# Supplementary material for: Antioxidant Lignans and Neolignans from Acorus tatarinowii
Source: PubMed Central journal article supplement (PMC4785495; doi:10.1038/srep22909), 2016-03-10
Supplement: srep22909-s1.pdf [file srep22909-s1.pdf]

# *Antioxidant Lignans and Neolignans from Acorus tatarinowii*

Yuanyuan Lu,<sup>1,2</sup> Yongbo Xue,<sup>1</sup> Shenjie Chen,<sup>1</sup> Hucheng Zhu,<sup>1</sup> Jinwen Zhang,<sup>2</sup>  
Xiao-Nian Li,<sup>3</sup> Jianping Wang,<sup>1</sup> JunJun Liu,<sup>1</sup> Changxing Qi,<sup>1</sup> Guang Du<sup>2,\*</sup> & Yonghui  
Zhang<sup>1,\*</sup>

<sup>1</sup>Hubei Key Laboratory of Natural Medicinal Chemistry and Resource Evaluation, School of Pharmacy, Tongji Medical College, Huazhong University of Science and Technology, Wuhan 430030, Hubei Province, People's Republic of China

<sup>2</sup>Tongji Hospital Affiliated to Tongji Medical College, Huazhong University of Science and Technology, Wuhan 430030, Hubei Province, People's Republic of China

<sup>3</sup>State Key Laboratory of Phytochemistry and Plant Resources in West China, Kunming Institute of Botany, Chinese Academy of Sciences, Kunming 650204, People's Republic of China

## **\* Corresponding Authors**

\* Tel./fax: +86-027-83692892

Emails: zhangyh@mails.tjmu.edu.cn (Y.Z.);

tjyxb@sina.com (G.D.)

|                                                                                                                |     |
|----------------------------------------------------------------------------------------------------------------|-----|
| <b>Figure S1.</b> (+)-HR-ESI-MS spectrum of <b>1 (1a/1b)</b> .....                                             | 1   |
| <b>Figure S2.</b> IR spectrum of <b>1 (1a/1b)</b> .....                                                        | 1   |
| <b>Figure S3.</b> UV spectrum of <b>1 (1a/1b)</b> .....                                                        | 2   |
| <b>Figure S4.</b> <sup>1</sup> H NMR spectrum of <b>1 (1a/1b)</b> in CDCl <sub>3</sub> .....                   | 2   |
| <b>Figure S5.</b> <sup>13</sup> C NMR spectrum of <b>1(1a/1b)</b> in CDCl <sub>3</sub> .....                   | 3   |
| <b>Figure S6.</b> HSQC spectrum of <b>1 (1a/1b)</b> in CDCl <sub>3</sub> .....                                 | 3   |
| <b>Figure S7.</b> HMBC spectrum of <b>1 (1a/1b)</b> in CDCl <sub>3</sub> .....                                 | 4   |
| <b>Figure S8.</b> <sup>1</sup> H- <sup>1</sup> H COSY spectrum of <b>1 (1a/1b)</b> in CDCl <sub>3</sub> .....  | 4   |
| <b>Figure S9.</b> NOESY spectrum of <b>1 (1a/1b)</b> in CDCl <sub>3</sub> .....                                | 5   |
| <b>Figure S10.</b> (+)-HR-ESI-MS spectrum of <b>2 (2a/2b)</b> .....                                            | 5   |
| <b>Figure S11.</b> IR spectrum of <b>2 (2a/2b)</b> .....                                                       | 6   |
| <b>Figure S12.</b> UV spectrum of <b>2 (2a/2b)</b> .....                                                       | 6   |
| <b>Figure S13.</b> <sup>1</sup> H NMR spectrum of <b>2 (2a/2b)</b> in CDCl <sub>3</sub> .....                  | 7   |
| <b>Figure S14.</b> <sup>13</sup> C NMR spectrum of <b>2 (2a/2b)</b> in CDCl <sub>3</sub> .....                 | 7   |
| <b>Figure S15.</b> HSQC spectrum of <b>2 (2a/2b)</b> in CDCl <sub>3</sub> .....                                | 8   |
| <b>Figure S16.</b> HMBC spectrum of <b>2 (2a/2b)</b> in CDCl <sub>3</sub> .....                                | 8   |
| <b>Figure S17.</b> <sup>1</sup> H- <sup>1</sup> H COSY spectrum of <b>2 (2a/2b)</b> in CDCl <sub>3</sub> ..... | 9   |
| <b>Figure S18.</b> NOESY spectrum of <b>2 (2a/2b)</b> in CDCl <sub>3</sub> .....                               | 9   |
| <b>Figure S19.</b> (+)-HR-ESI-MS spectrum of <b>3 (3a/3b)</b> .....                                            | 10  |
| <b>Figure S20.</b> IR spectrum of <b>3 (3a/3b)</b> .....                                                       | 10  |
| <b>Figure S21.</b> UV spectrum of <b>3 (3a/3b)</b> .....                                                       | 11  |
| <b>Figure S22.</b> <sup>1</sup> H NMR spectrum of <b>3 (3a/3b)</b> in CD <sub>3</sub> OD.....                  | 11  |
| <b>Figure S23.</b> <sup>13</sup> C NMR spectrum of <b>3 (3a/3b)</b> in CD <sub>3</sub> OD.....                 | 12  |
| <b>Figure S24.</b> HSQC spectrum of <b>3 (3a/3b)</b> in CD <sub>3</sub> OD.....                                | 112 |
| <b>Figure S25.</b> HMBC spectrum of <b>3 (3a/3b)</b> in CD <sub>3</sub> OD.....                                | 13  |
| <b>Figure S26.</b> <sup>1</sup> H- <sup>1</sup> H COSY spectrum of <b>3 (3a/3b)</b> in CD <sub>3</sub> OD..... | 13  |
| <b>Figure S27.</b> NOESY spectrum of <b>3 (3a/3b)</b> in CD <sub>3</sub> OD.....                               | 14  |
| <b>Figure S28.</b> (+)-HR-ESI-MS spectrum of <b>4</b> .....                                                    | 14  |
| <b>Figure S29.</b> IR spectrum of <b>4</b> .....                                                               | 15  |
| <b>Figure S30.</b> UV spectrum of <b>4</b> .....                                                               | 15  |

|                                                                                                          |    |
|----------------------------------------------------------------------------------------------------------|----|
| <b>Figure S31.</b> $^1\text{H}$ NMR spectrum of <b>4</b> in $\text{CDCl}_3$ .....                        | 16 |
| <b>Figure S32.</b> $^{13}\text{C}$ NMR spectrum of <b>4</b> in $\text{CDCl}_3$ .....                     | 16 |
| <b>Figure S33.</b> HSQC spectrum of <b>4</b> in $\text{CDCl}_3$ .....                                    | 17 |
| <b>Figure S34.</b> HMBC spectrum of <b>4</b> in $\text{CDCl}_3$ .....                                    | 17 |
| <b>Figure S35.</b> $^1\text{H}$ - $^1\text{H}$ COSY spectrum of <b>4</b> in $\text{CDCl}_3$ .....        | 18 |
| <b>Figure S37.</b> ECD spectrum of <b>4</b> in MeOH.....                                                 | 18 |
| <b>Figure S38.</b> (+)-HR-ESI-MS spectrum of <b>5</b> .....                                              | 19 |
| <b>Figure S39.</b> IR spectrum of <b>5</b> .....                                                         | 19 |
| <b>Figure S40.</b> UV spectrum of <b>5</b> .....                                                         | 20 |
| <b>Figure S41.</b> $^1\text{H}$ NMR spectrum of <b>5</b> in $\text{CD}_3\text{OD}$ .....                 | 21 |
| <b>Figure S42.</b> $^{13}\text{C}$ NMR spectrum of <b>5</b> in $\text{CD}_3\text{OD}$ .....              | 21 |
| <b>Figure S43.</b> HSQC spectrum of <b>5</b> in $\text{CD}_3\text{OD}$ .....                             | 22 |
| <b>Figure S44.</b> HMBC spectrum of <b>5</b> in $\text{CD}_3\text{OD}$ .....                             | 22 |
| <b>Figure S45.</b> $^1\text{H}$ - $^1\text{H}$ COSY spectrum of <b>5</b> in $\text{CD}_3\text{OD}$ ..... | 22 |
| <b>Figure S46.</b> NOSEY spectrum of <b>5</b> in $\text{CD}_3\text{OD}$ .....                            | 23 |
| <b>Figure S47.</b> ECD spectrum of <b>5</b> in MeOH.....                                                 | 23 |
| <b>Figure S48.</b> (+)-HR-ESI-MS spectrum of <b>6</b> .....                                              | 24 |
| <b>Figure S49.</b> IR spectrum of <b>6</b> ( <b>6a/6b</b> ).....                                         | 24 |
| <b>Figure S50.</b> UV spectrum of <b>6</b> .....                                                         | 25 |
| <b>Figure S51.</b> $^1\text{H}$ NMR spectrum of <b>6</b> in $\text{CD}_3\text{OD}$ .....                 | 25 |
| <b>Figure S52.</b> $^{13}\text{C}$ NMR spectrum of <b>6</b> in $\text{CD}_3\text{OD}$ .....              | 26 |
| <b>Figure S53.</b> HSQC spectrum of <b>6</b> in $\text{CD}_3\text{OD}$ .....                             | 26 |
| <b>Figure S54.</b> HMBC spectrum of <b>6</b> in $\text{CD}_3\text{OD}$ .....                             | 27 |
| <b>Figure S55.</b> $^1\text{H}$ - $^1\text{H}$ COSY spectrum of <b>6</b> in $\text{CD}_3\text{OD}$ ..... | 27 |
| <b>Figure S56.</b> NOESY spectrum of <b>6</b> in $\text{CD}_3\text{OD}$ .....                            | 28 |
| <b>Figure S57.</b> ECD spectrum of <b>6</b> in MeOH.....                                                 | 28 |
| <b>Figure S58.</b> (+)-HR-ESI-MS spectrum of <b>7</b> .....                                              | 29 |
| <b>Figure S59.</b> IR spectrum of <b>7</b> .....                                                         | 29 |
| <b>Figure S60.</b> UV spectrum of <b>7</b> .....                                                         | 30 |
| <b>Figure S61.</b> $^1\text{H}$ NMR spectrum of <b>7</b> in $\text{CD}_3\text{OD}$ .....                 | 31 |

|                                                                                                                                                                                                       |    |
|-------------------------------------------------------------------------------------------------------------------------------------------------------------------------------------------------------|----|
| <b>Figure S62.</b> $^{13}\text{C}$ NMR spectrum of <b>7</b> in $\text{CD}_3\text{OD}$ .....                                                                                                           | 31 |
| <b>Figure S63.</b> HSQC spectrum of <b>7</b> in $\text{CD}_3\text{OD}$ .....                                                                                                                          | 32 |
| <b>Figure S64.</b> HMBC spectrum of <b>7</b> in $\text{CD}_3\text{OD}$ .....                                                                                                                          | 32 |
| <b>Figure S65.</b> $^1\text{H}$ - $^1\text{H}$ COSY spectrum of <b>7</b> in $\text{CD}_3\text{OD}$ .....                                                                                              | 32 |
| <b>Figure S66.</b> NOESY spectrum of <b>7</b> in $\text{CD}_3\text{OD}$ .....                                                                                                                         | 33 |
| <b>Figure S67.</b> ECD spectrum of <b>7</b> in MeOH.....                                                                                                                                              | 33 |
| <b>Figure S68.</b> (+)-HR-ESI-MS spectrum of <b>8</b> .....                                                                                                                                           | 34 |
| <b>Figure S69.</b> IR spectrum of <b>8</b> .....                                                                                                                                                      | 34 |
| <b>Figure S70.</b> UV spectrum of <b>8</b> .....                                                                                                                                                      | 35 |
| <b>Figure S71.</b> $^1\text{H}$ NMR spectrum of <b>8</b> in $\text{CD}_3\text{OD}$ .....                                                                                                              | 35 |
| <b>Figure S72.</b> $^{13}\text{C}$ NMR spectrum of <b>8</b> in $\text{CD}_3\text{OD}$ .....                                                                                                           | 36 |
| <b>Figure S73.</b> HSQC spectrum of <b>8</b> in $\text{CD}_3\text{OD}$ .....                                                                                                                          | 36 |
| <b>Figure S74.</b> HMBC spectrum of <b>8</b> in $\text{CD}_3\text{OD}$ .....                                                                                                                          | 37 |
| <b>Figure S75.</b> $^1\text{H}$ - $^1\text{H}$ COSY spectrum of <b>8</b> in $\text{CD}_3\text{OD}$ .....                                                                                              | 37 |
| <b>Figure S76.</b> NOESY spectrum of <b>8</b> in $\text{CD}_3\text{OD}$ .....                                                                                                                         | 38 |
| <b>Figure S77.</b> ECD spectrum of <b>8</b> in MeOH.....                                                                                                                                              | 38 |
| <b>Figure S78.</b> (+)-HR-ESI-MS spectrum of <i>S</i> -MTPA- <b>7</b> ester .....                                                                                                                     | 39 |
| <b>Figure S79.</b> (+)-HR-ESI-MS spectrum of <i>R</i> -MTPA- <b>7</b> ester.....                                                                                                                      | 39 |
| <b>Figure S80.</b> $^1\text{H}$ NMR spectrum of <i>R/S</i> -MTPA- <b>7</b> ester in $\text{CD}_3\text{OD}$ .....                                                                                      | 40 |
| <b>Figure S81.</b> ECD spectra calculation .....                                                                                                                                                      | 40 |
| <b>Figure S82.</b> Five lowest energy conformers of the isomer <i>7S,7'R,8S,8'S</i> and five lowest energy conformers of the <i>7R,7'S,8R,8'R</i> isomer of compound <b>1</b> .....                   | 41 |
| <b>Table S1.</b> Relative free energies ( $\Delta\text{G}$ ) and equilibrium populations (P) of the conformers of the ( <i>7S,7'R,8S,8'S</i> )- <b>1</b> and ( <i>7R,7'S,8R,8'R</i> )- <b>1</b> ..... | 42 |

**Figure S1.** (+)-HR-ESI-MS spectrum of **1 (1a/1b)**

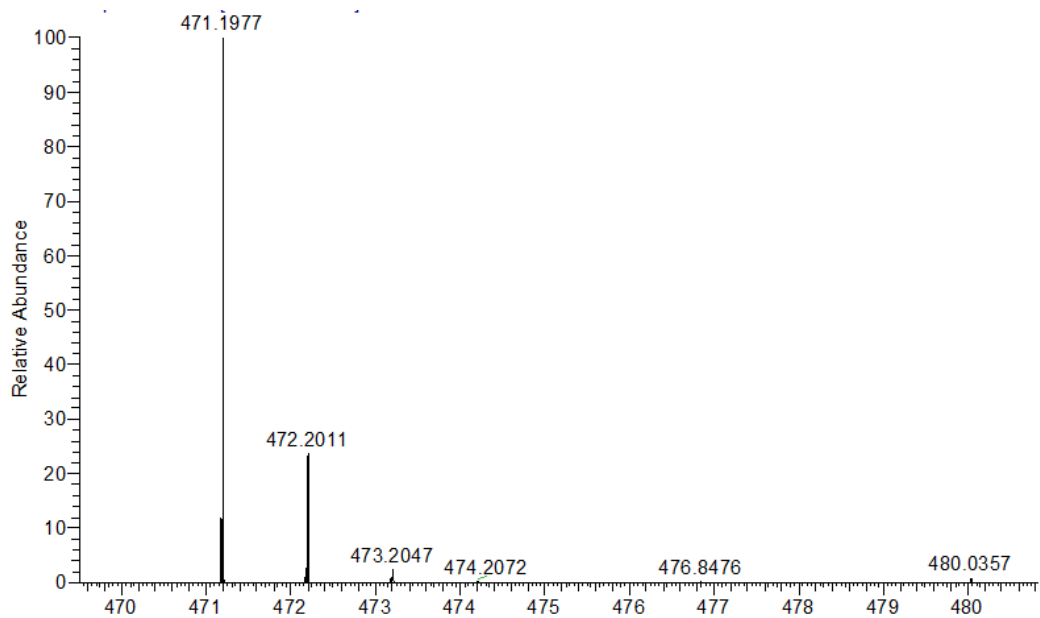

**Figure S2.** IR spectrum of **1 (1a/1b)**

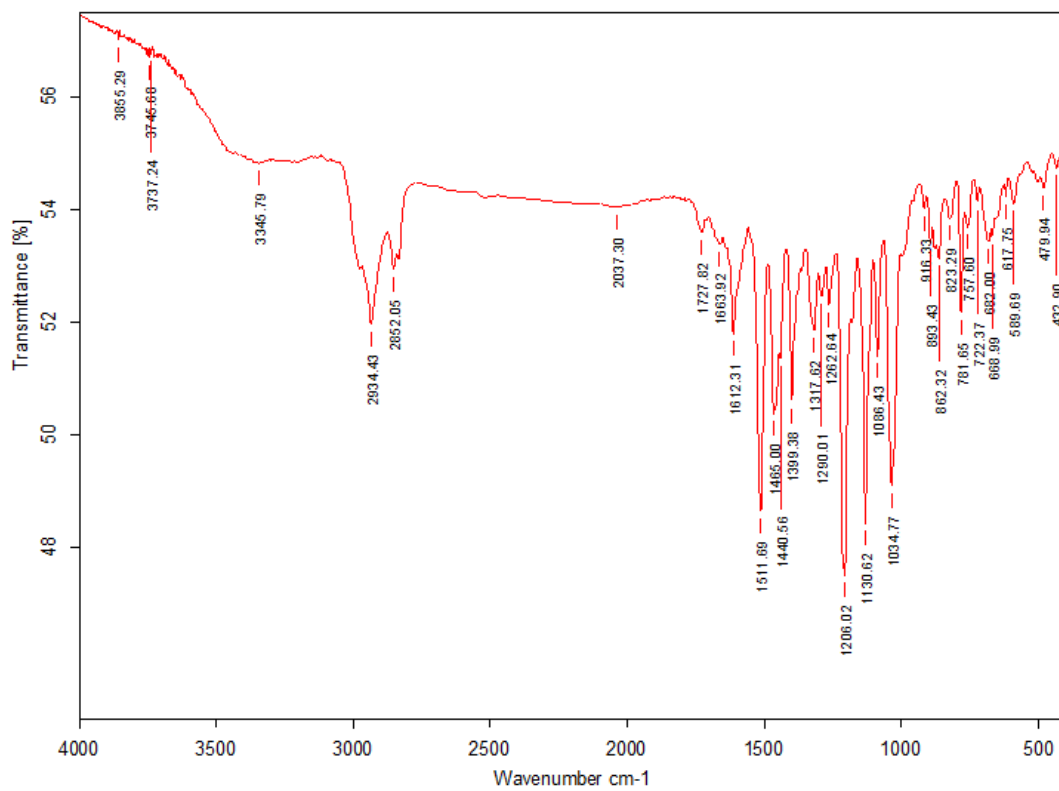

Figure S3. UV spectrum of 1 (1a/1b)

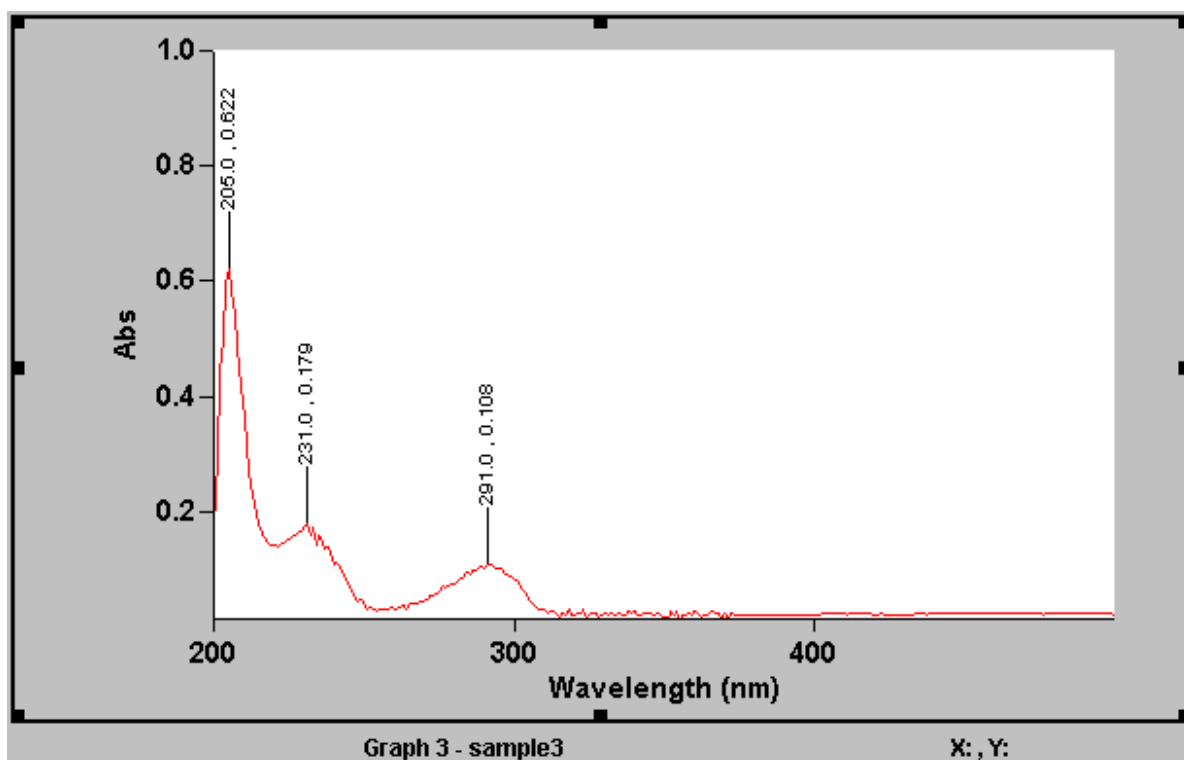

Figure S4.  $^1\text{H}$  NMR spectrum of 1 (1a/1b) in  $\text{CDCl}_3$

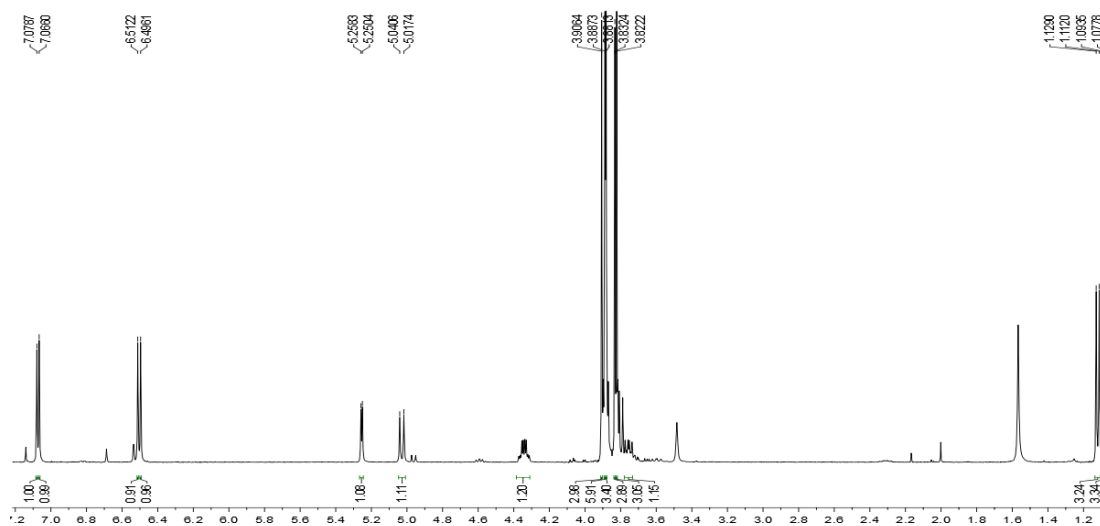

Figure S5.  $^{13}\text{C}$  NMR spectrum of **1**(**1a/1b**) in  $\text{CDCl}_3$

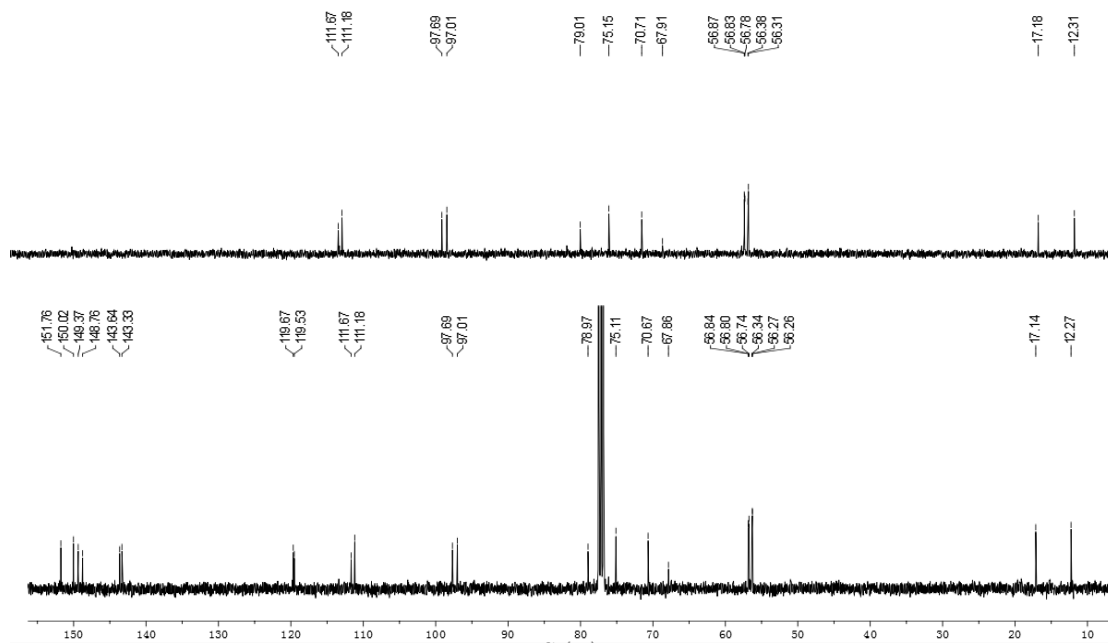

Figure S6. HSQC spectrum of **1** (**1a/1b**) in  $\text{CDCl}_3$

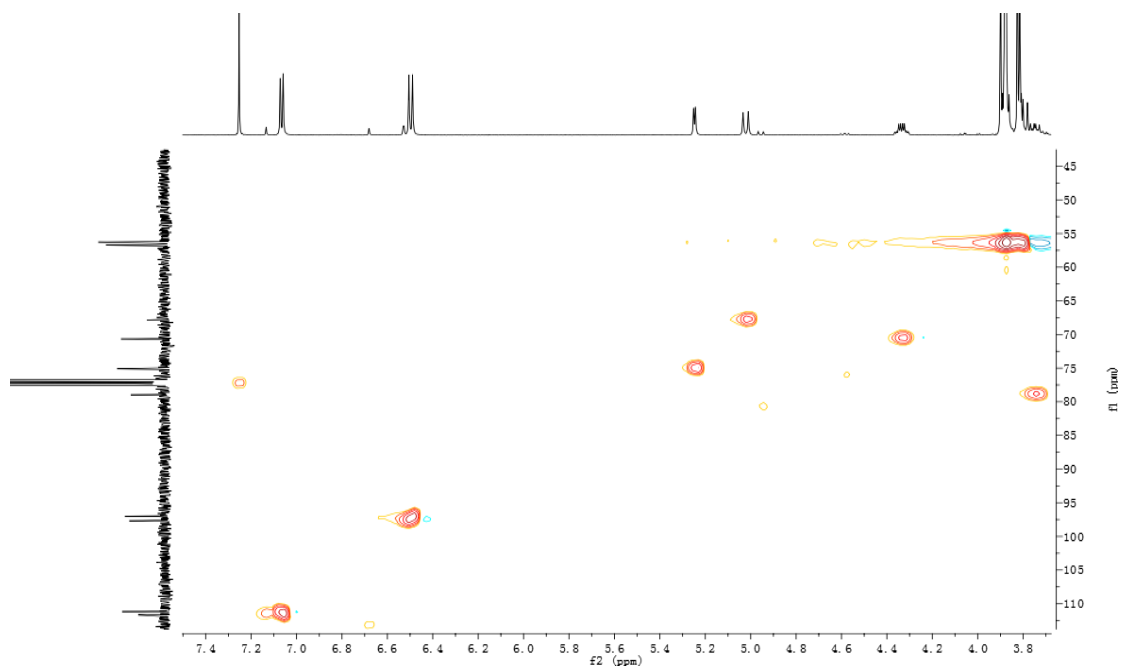

Figure S7. HMBC spectrum of **1** (**1a/1b**) in CDCl<sub>3</sub>

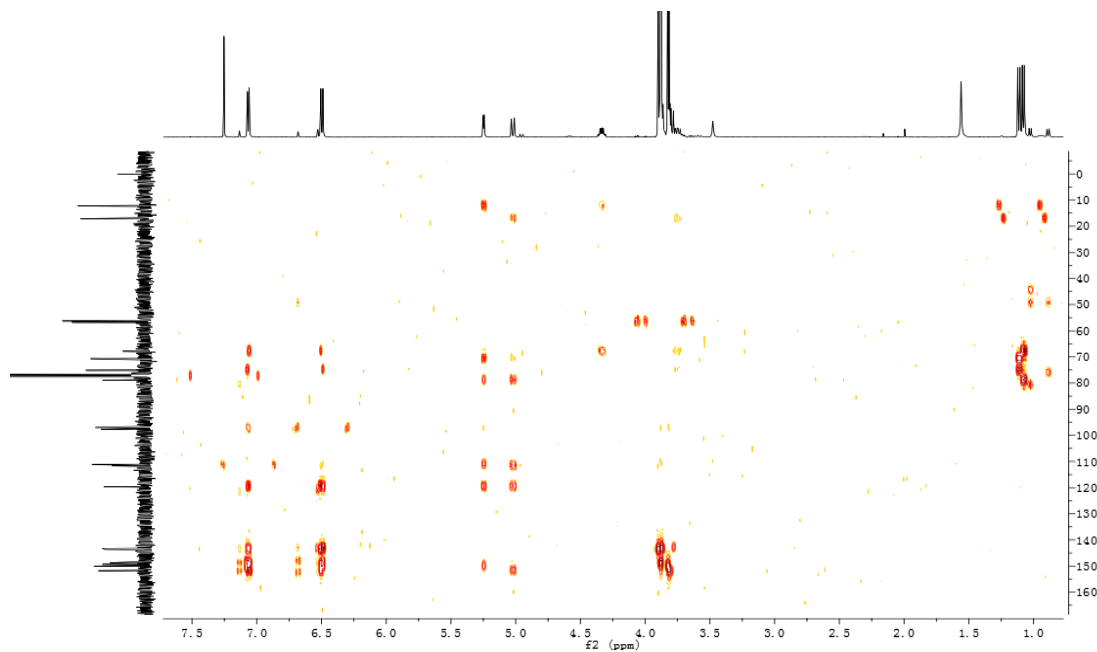

Figure S8. <sup>1</sup>H-<sup>1</sup>H COSY spectrum of **1** (**1a/1b**) in CDCl<sub>3</sub>

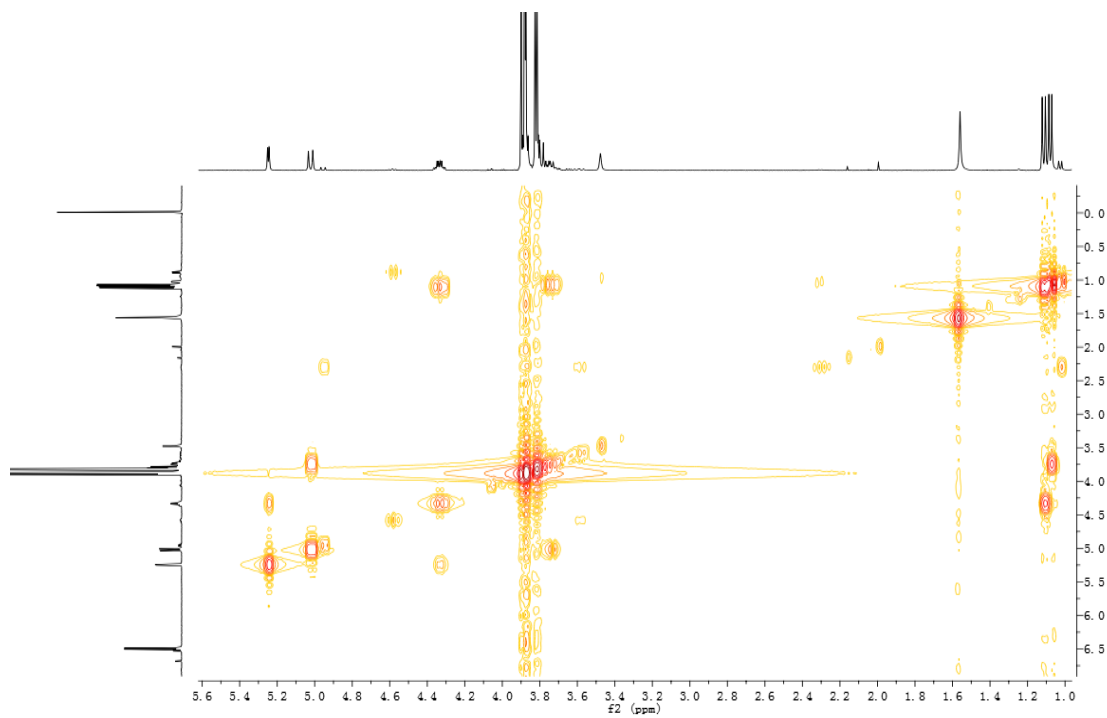



**Figure S9.** NOESY spectrum of **1** (**1a/1b**) in CDCl<sub>3</sub>

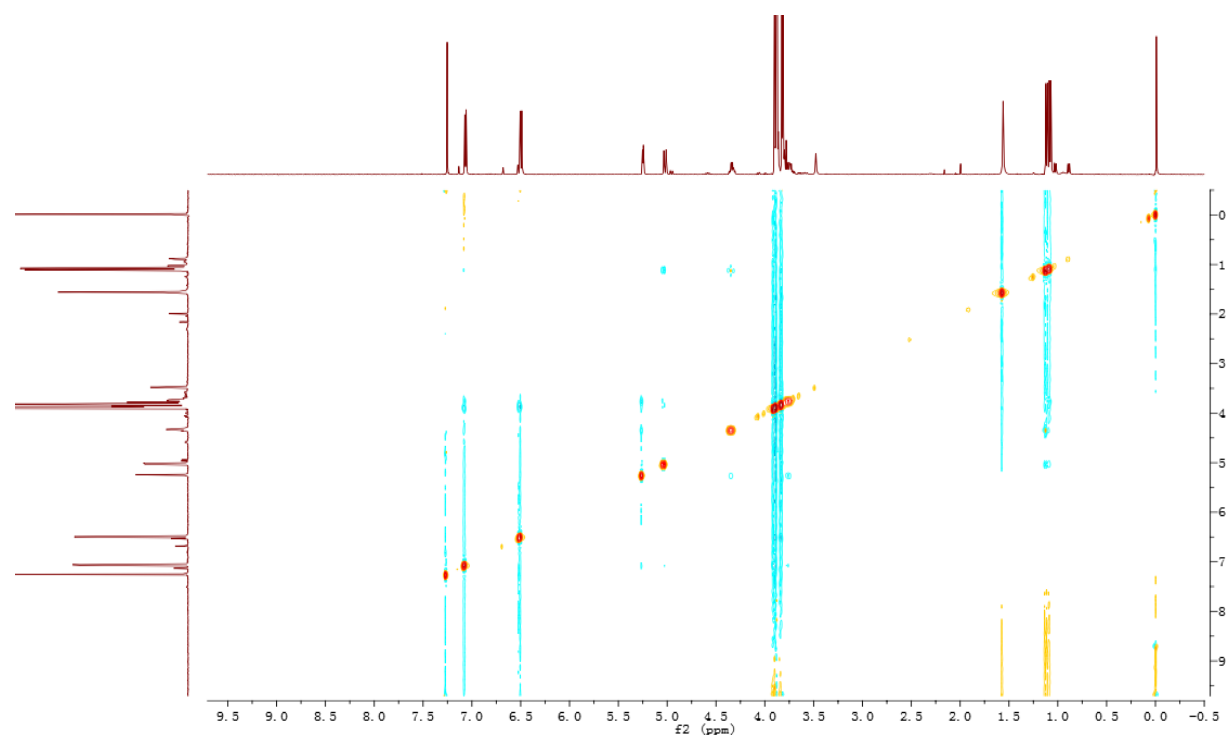

**Figure S10.** (+)-HR-ESI-MS spectrum of **2** (**2a/2b**)

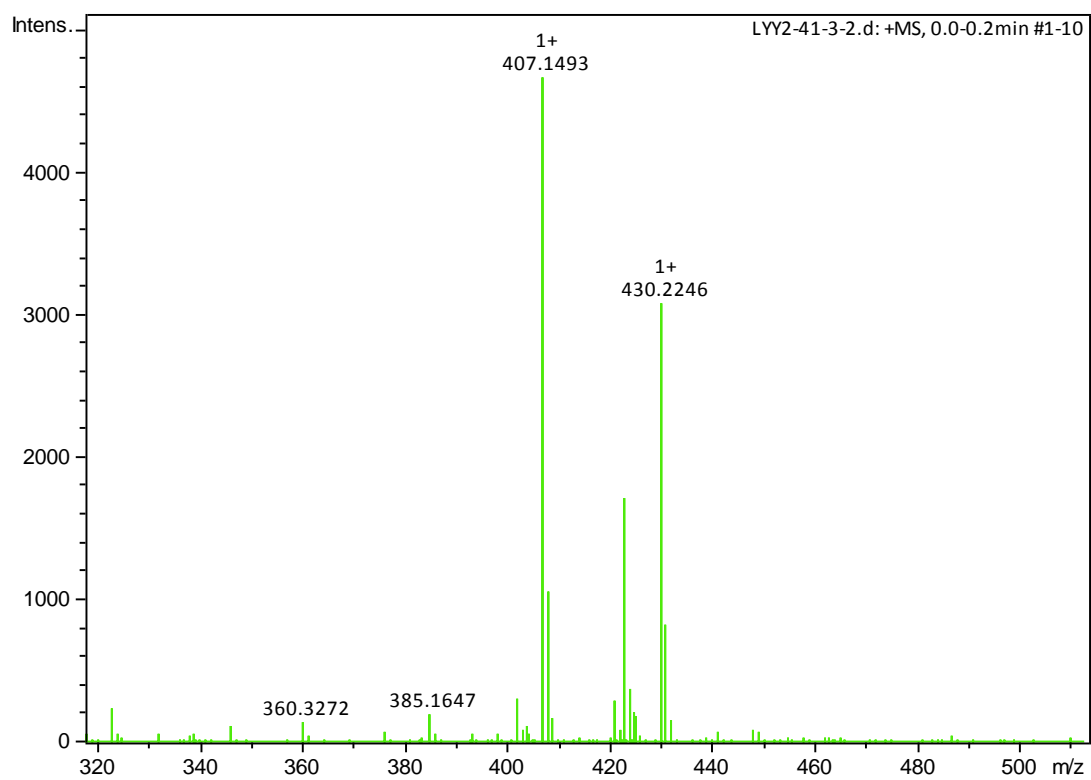

**Figure S11.** IR spectrum of **2 (2a/2b)**

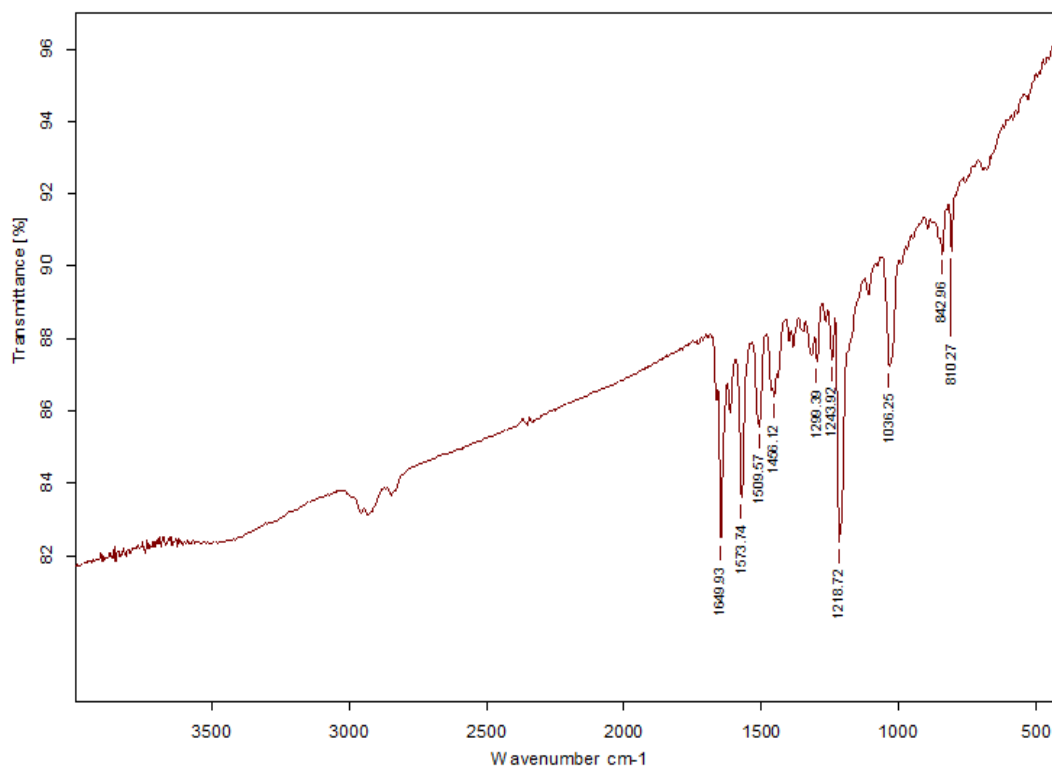

**Figure S12.** UV spectrum of **2 (2a/2b)**

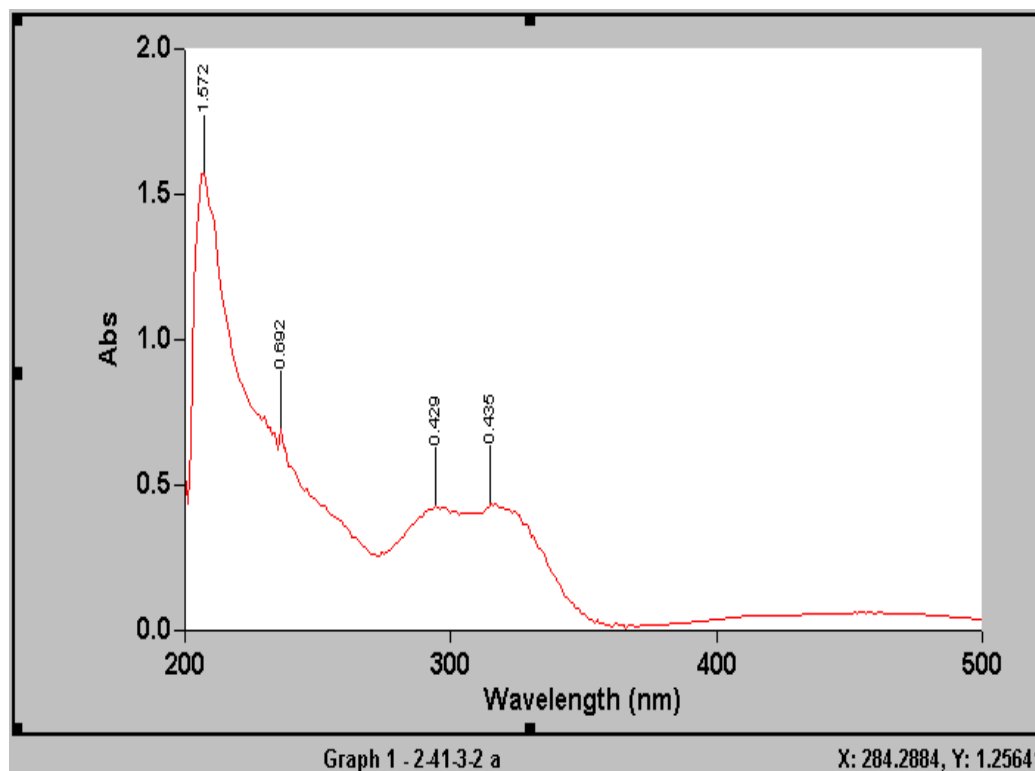

**Figure S13.**  $^1\text{H}$  NMR spectrum of **2** (**2a/2b**) in  $\text{CDCl}_3$

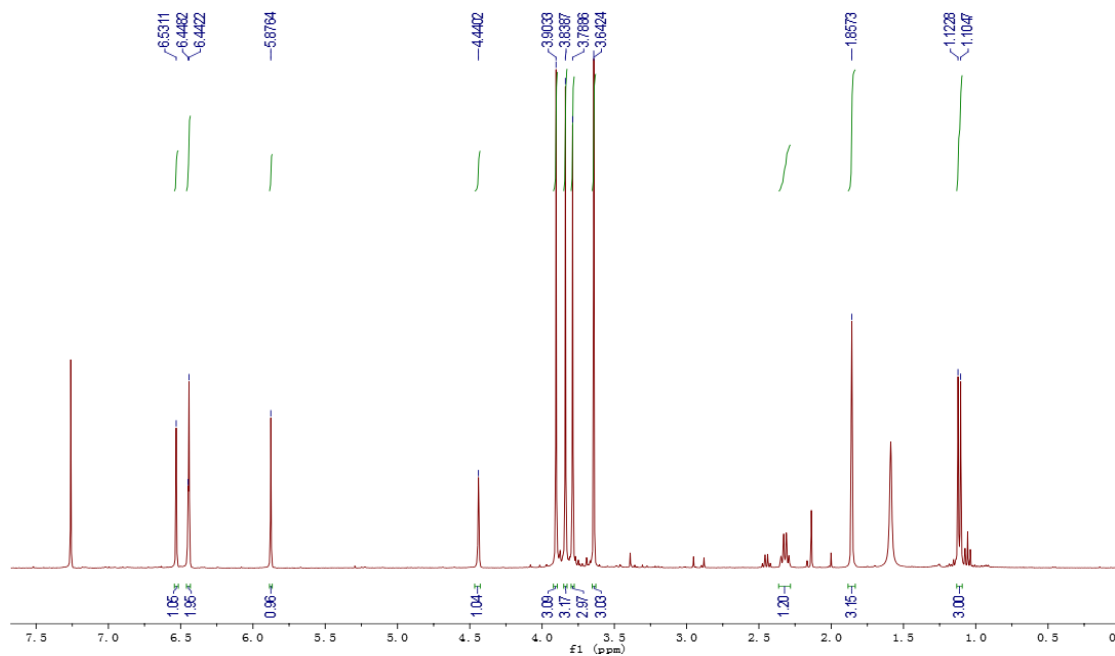

**Figure S14.**  $^{13}\text{C}$  NMR spectrum of **2** (**2a/2b**) in  $\text{CDCl}_3$

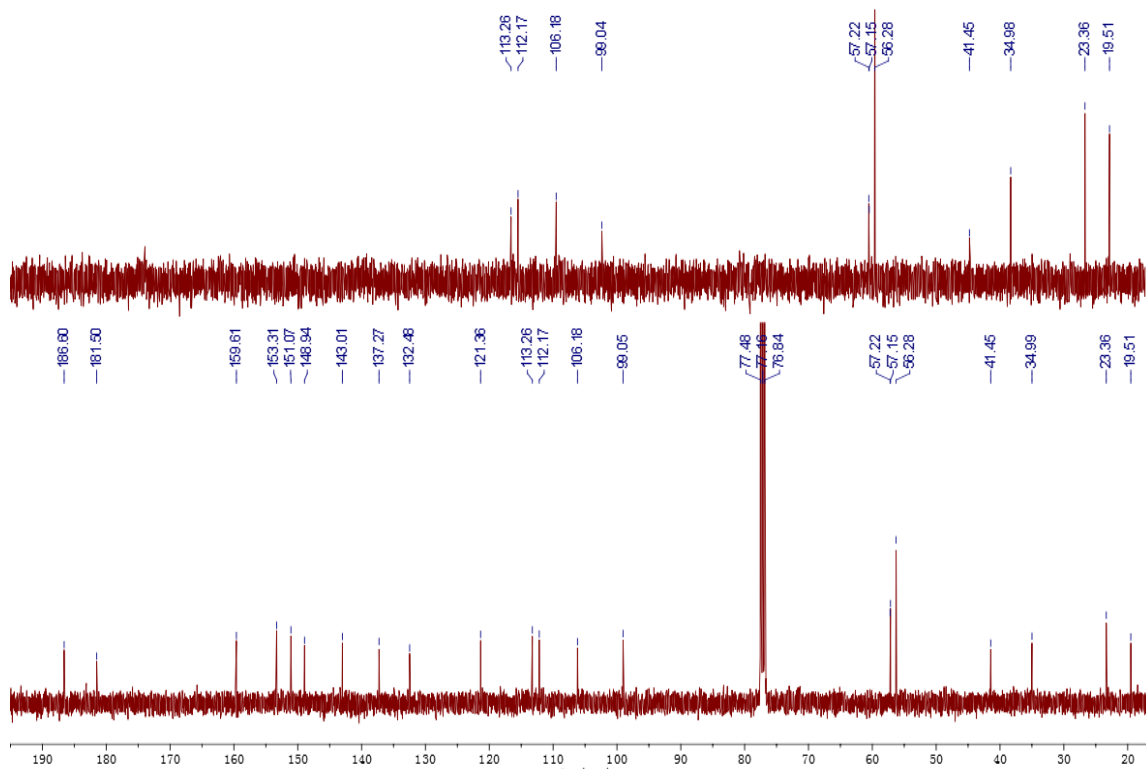

**Figure S15.** HSQC spectrum of **2 (2a/2b)** in  $\text{CDCl}_3$

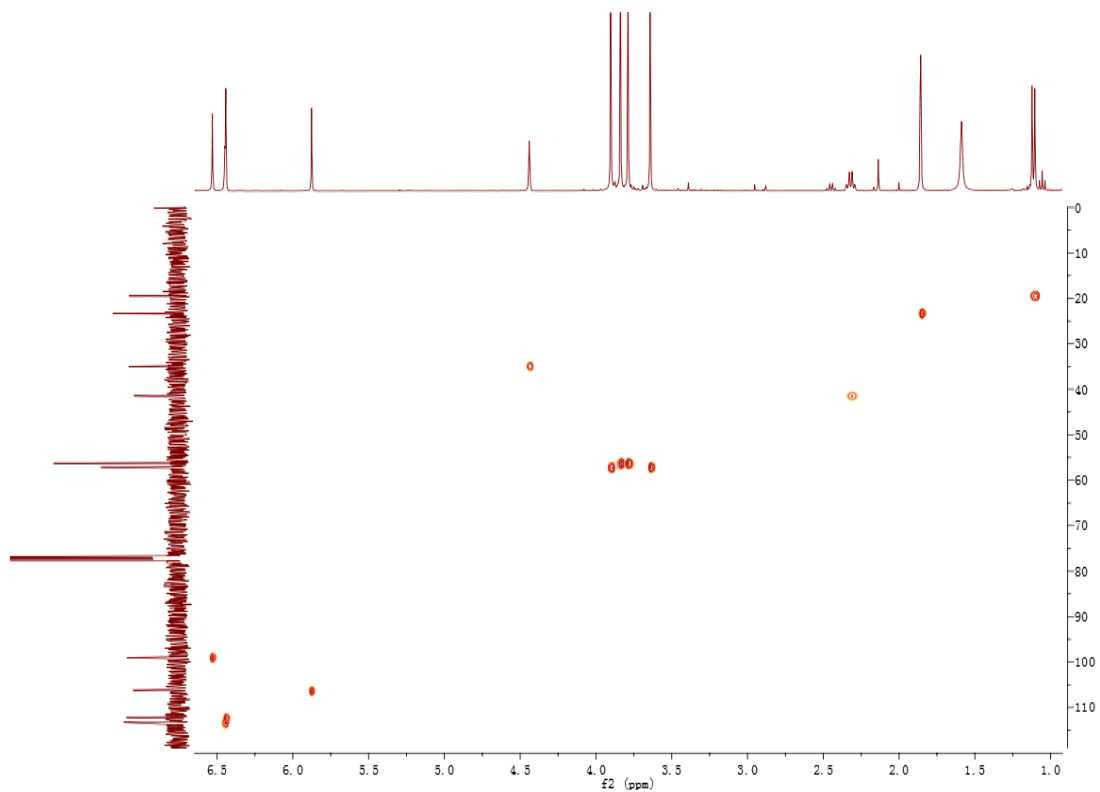

**Figure S16.** HMBC spectrum of **2 (2a/2b)** in  $\text{CDCl}_3$

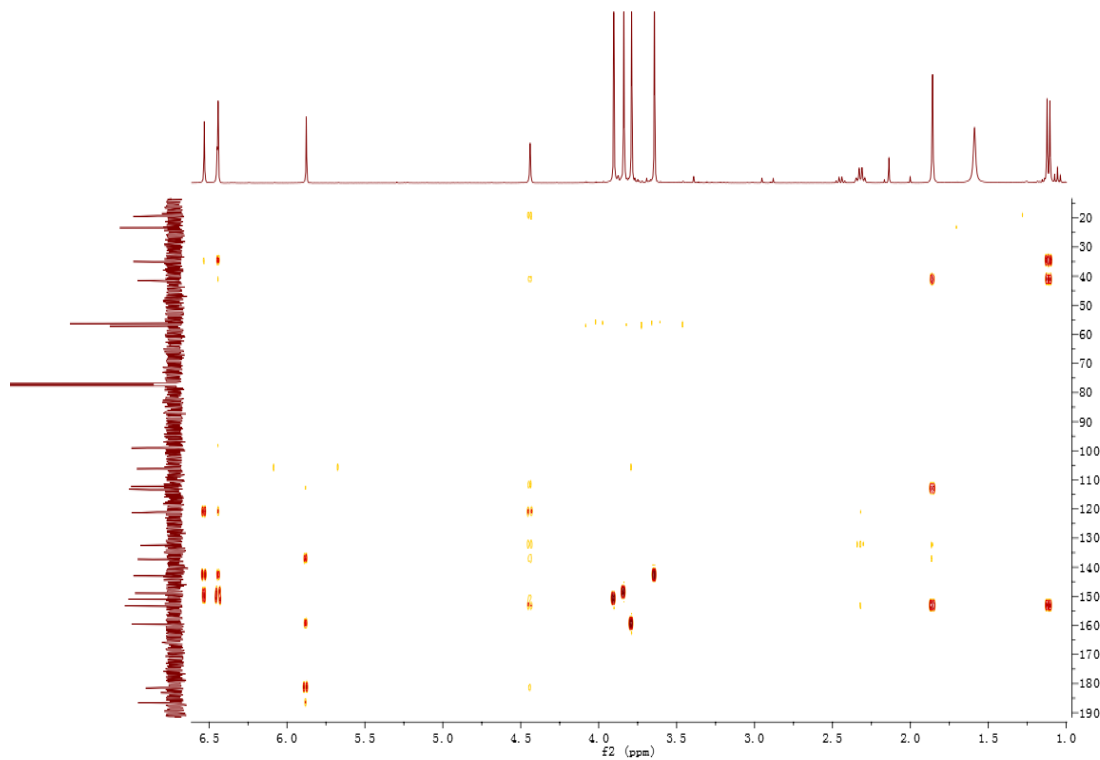

**Figure S17.**  $^1\text{H}$ - $^1\text{H}$  COSY spectrum of **2** (**2a/2b**) in  $\text{CDCl}_3$

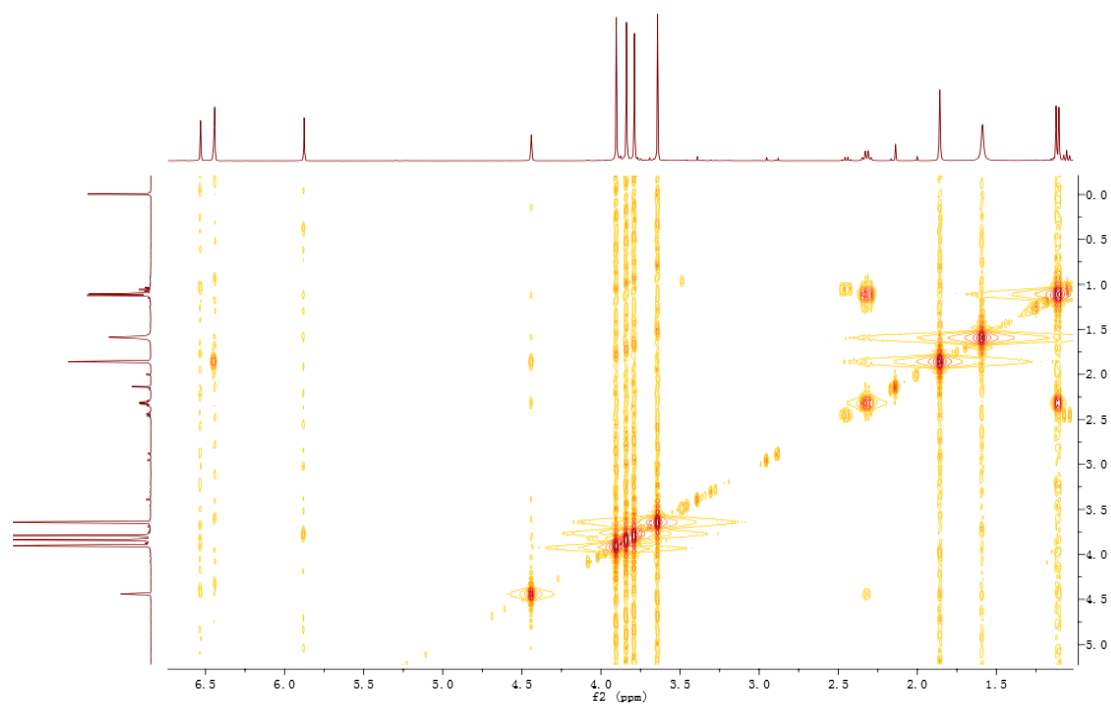

**Figure S18.** NOESY spectrum of **2** (**2a/2b**) in  $\text{CDCl}_3$

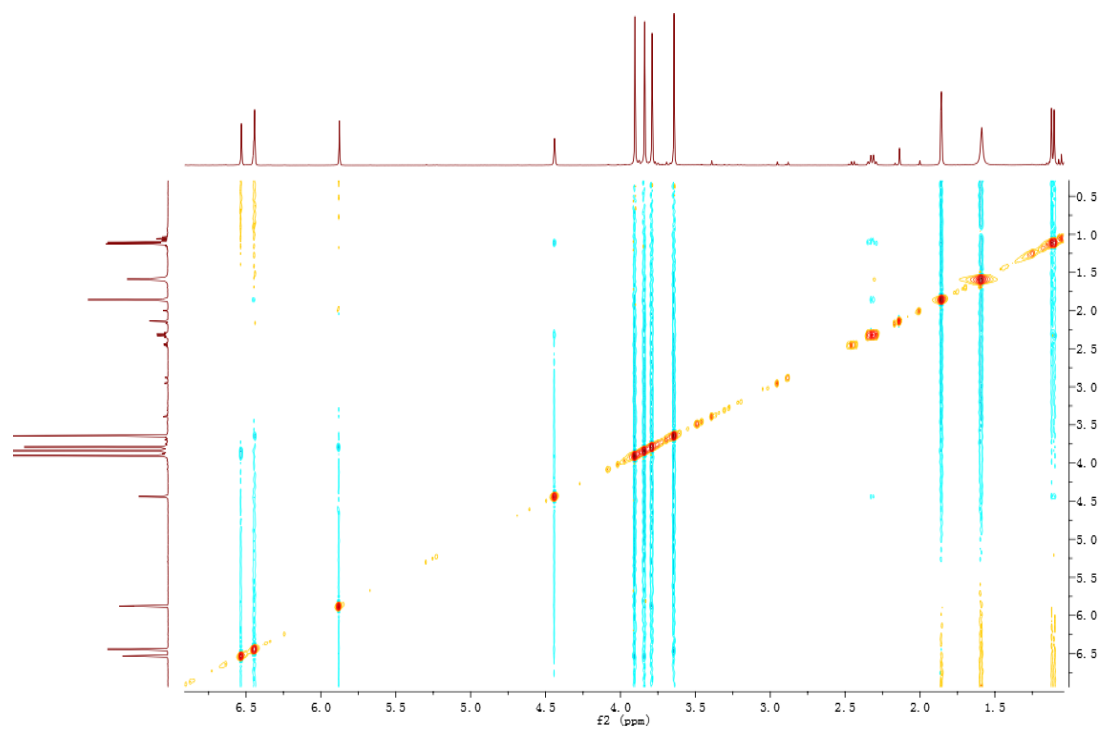

**Figure S19.** (+)-HR-ESI-MS spectrum of **3 (3a/3b)**

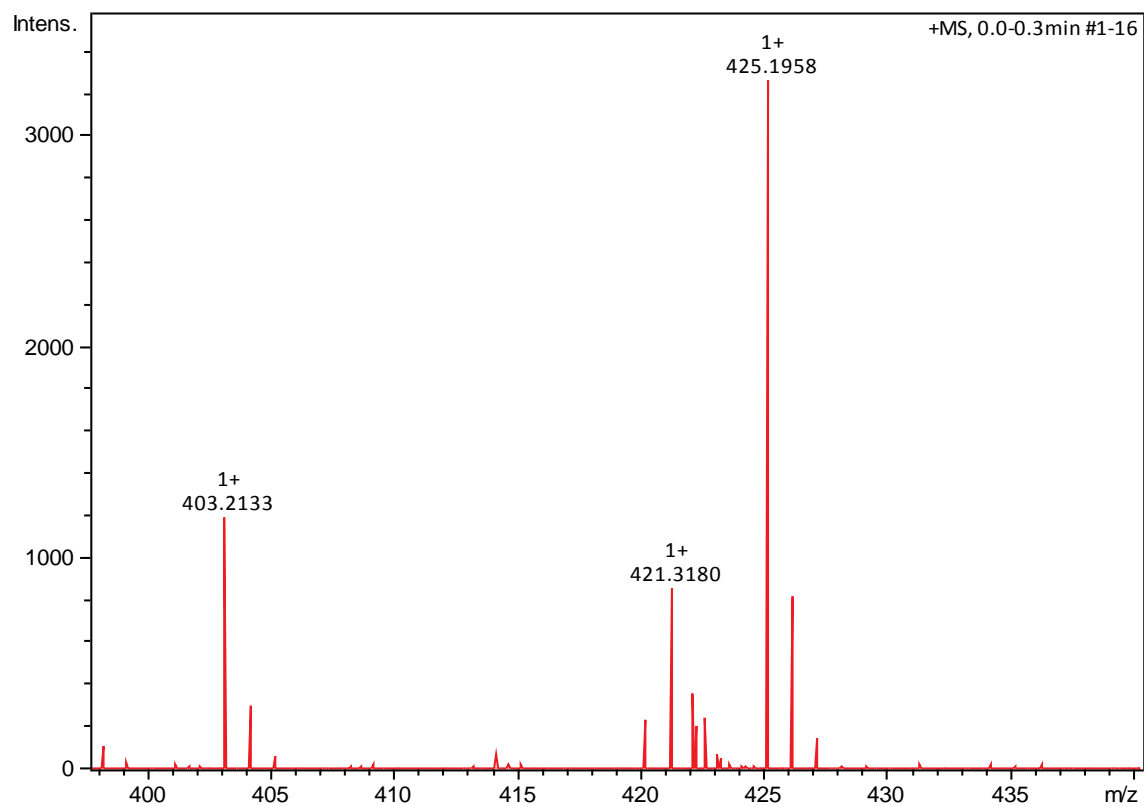

**Figure S20.** IR spectrum of **3 (3a/3b)**

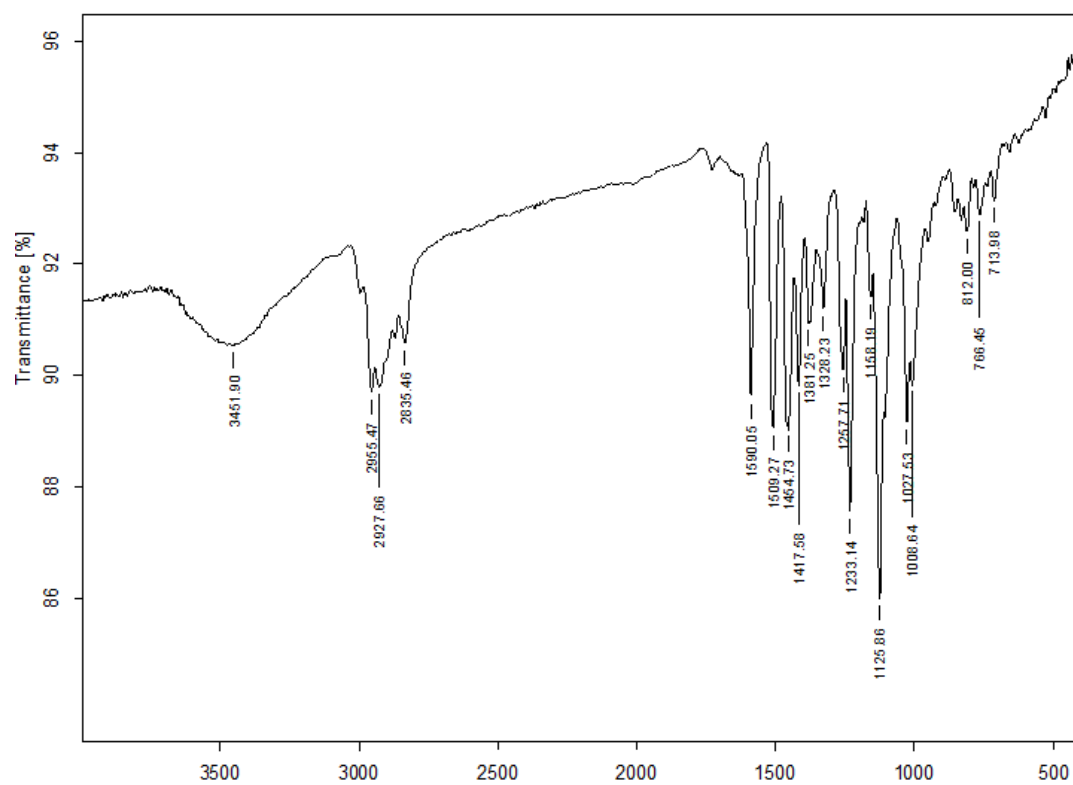

Figure S21. UV spectrum of **3** (**3a/3b**)

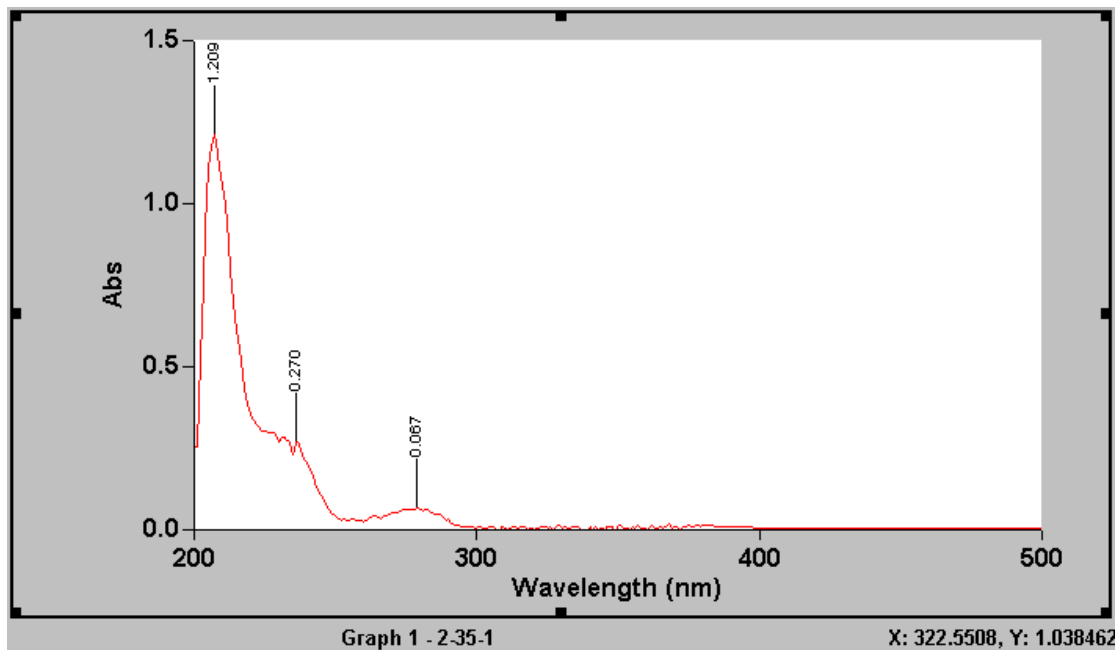

Figure S22.  $^1\text{H}$  NMR spectrum of **3** (**3a/3b**) in  $\text{CD}_3\text{OD}$

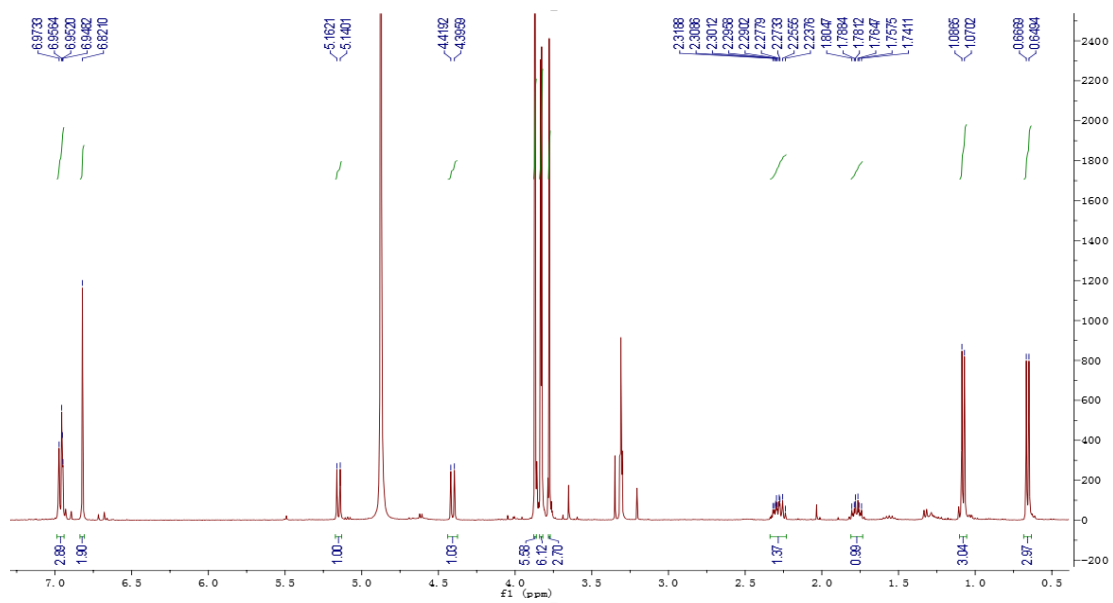

Figure S23.  $^{13}\text{C}$  NMR spectrum of **3** (**3a/3b**) in  $\text{CD}_3\text{OD}$

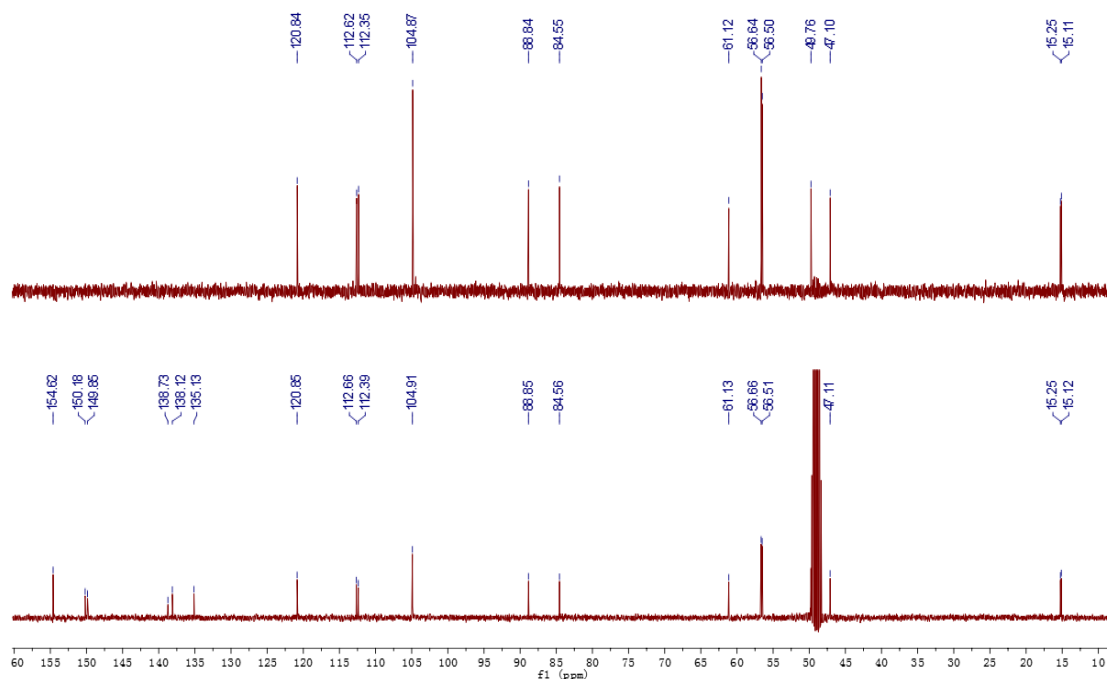

Figure S24. HSQC spectrum of **3** (**3a/3b**) in  $\text{CD}_3\text{OD}$

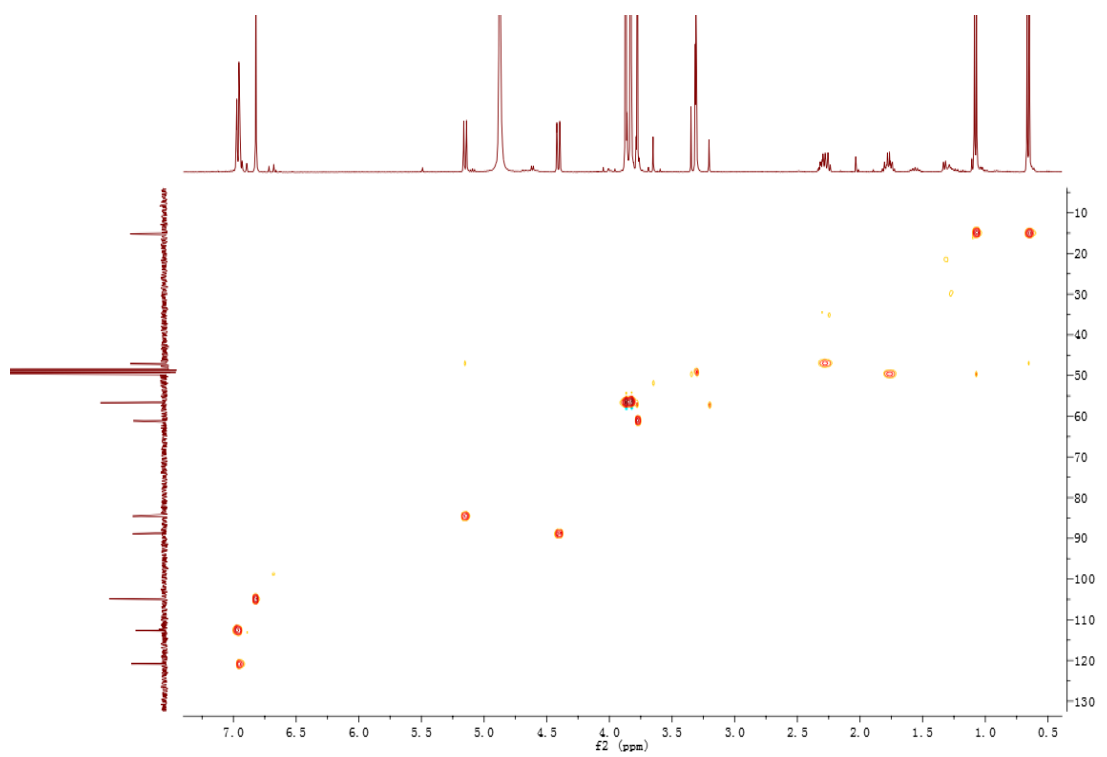



**Figure S25.** HMBC spectrum of **3 (3a/3b)** in CD<sub>3</sub>OD

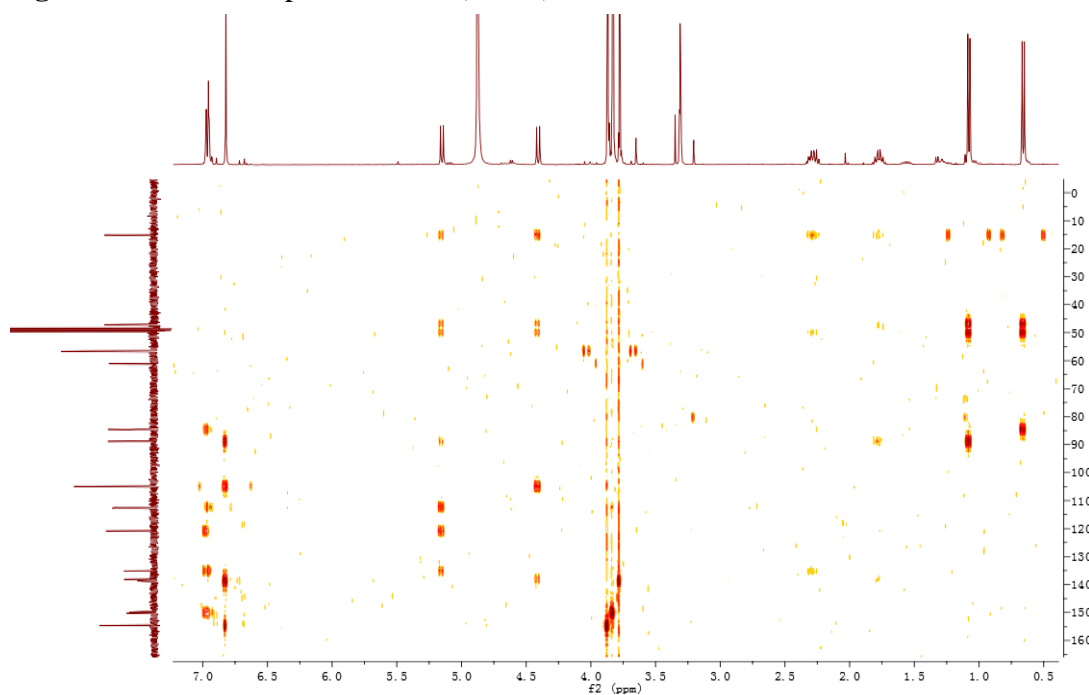

**Figure S26.** <sup>1</sup>H-<sup>1</sup>H COSY spectrum of **3 (3a/3b)** in CD<sub>3</sub>OD

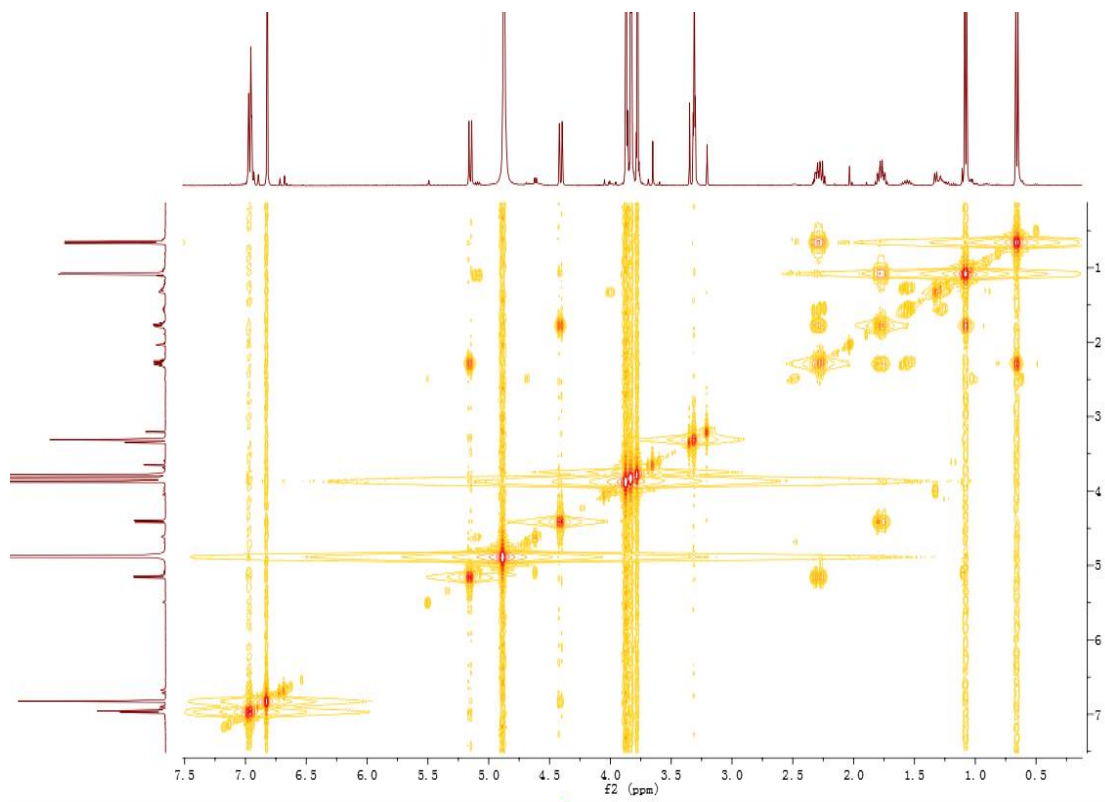

**Figure S27.** NOESY spectrum of **3** (**3a/3b**) in CD<sub>3</sub>OD

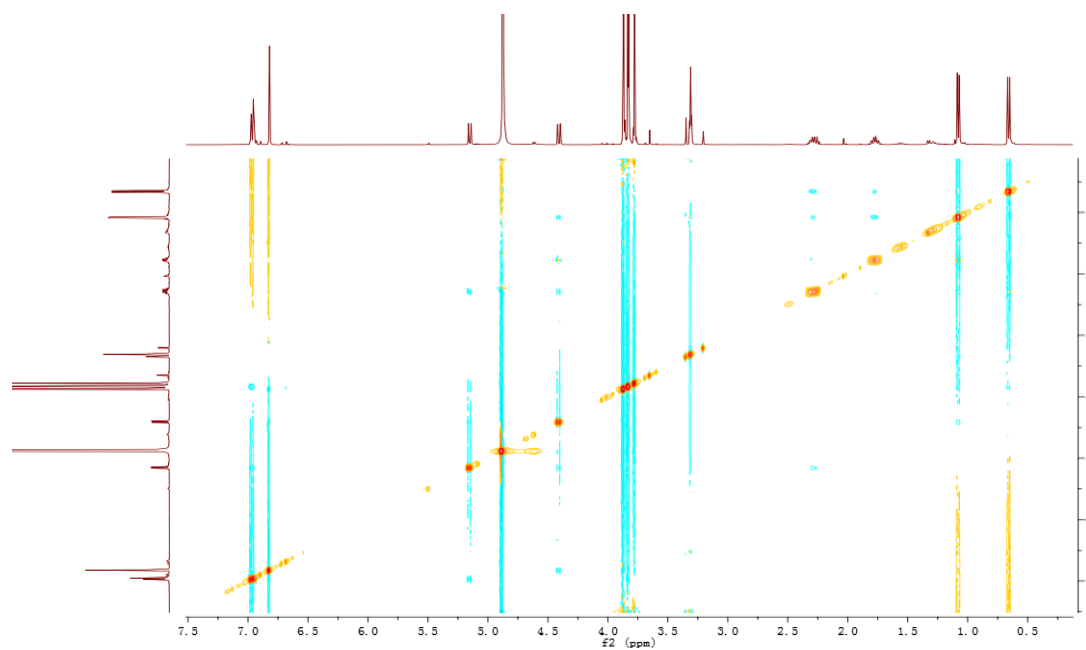

**Figure S28.** (+)-HR-ESI-MS spectrum of **4**

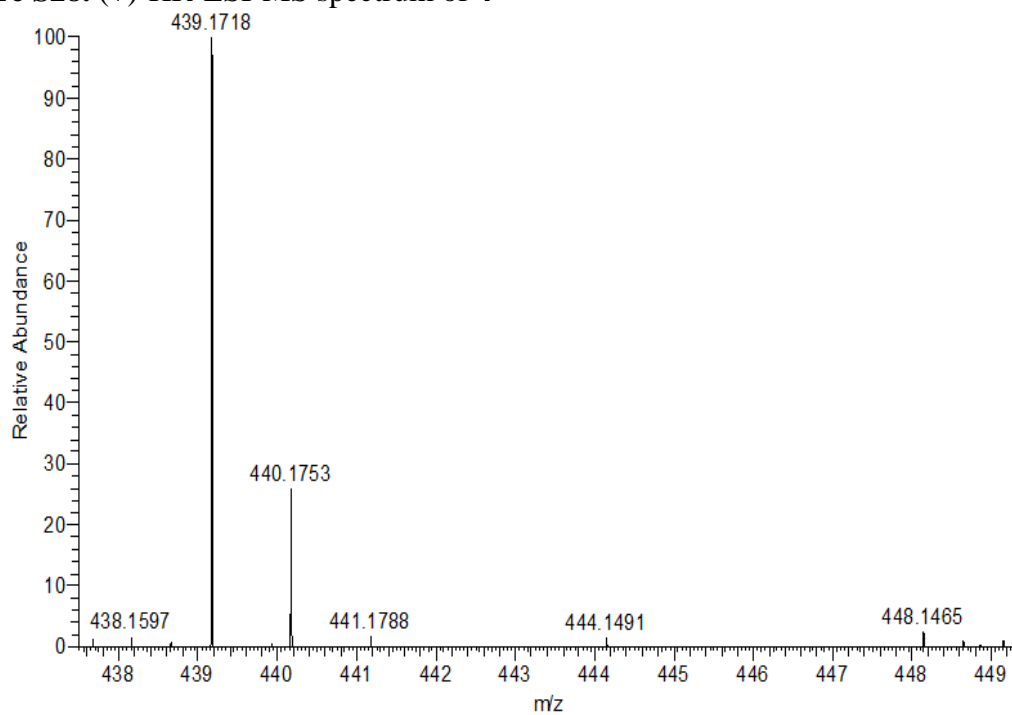

Figure S29. IR spectrum of 4

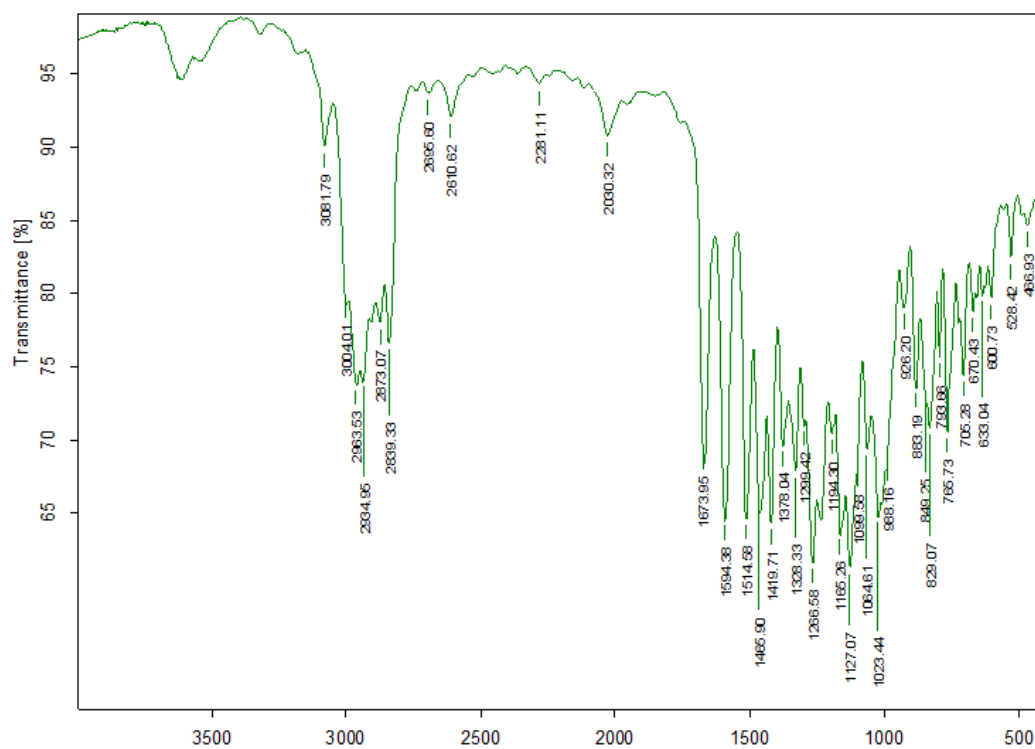

Figure S30. UV spectrum of 4

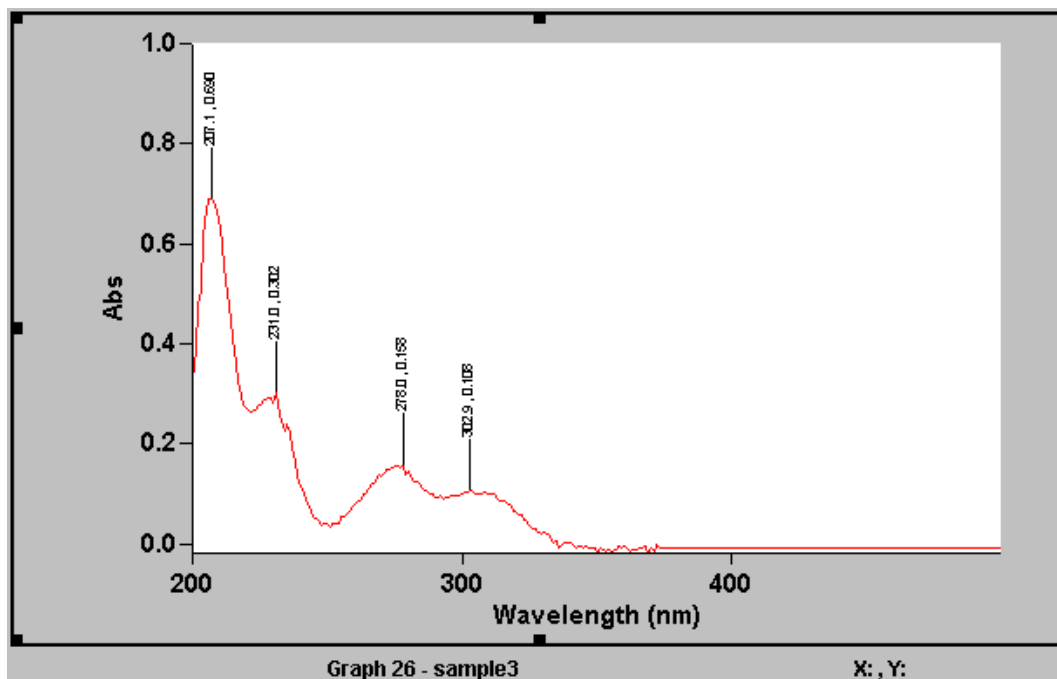

Figure S31.  $^1\text{H}$  NMR spectrum of **4** in  $\text{CDCl}_3$

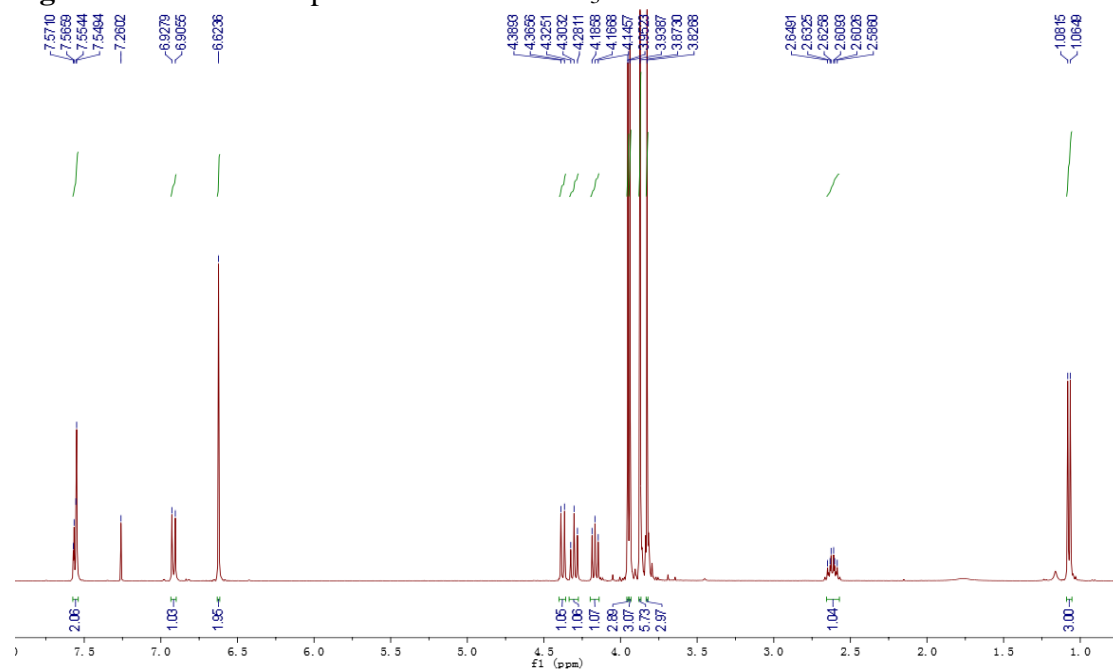

Figure S32.  $^{13}\text{C}$  NMR spectrum of **4** in  $\text{CDCl}_3$

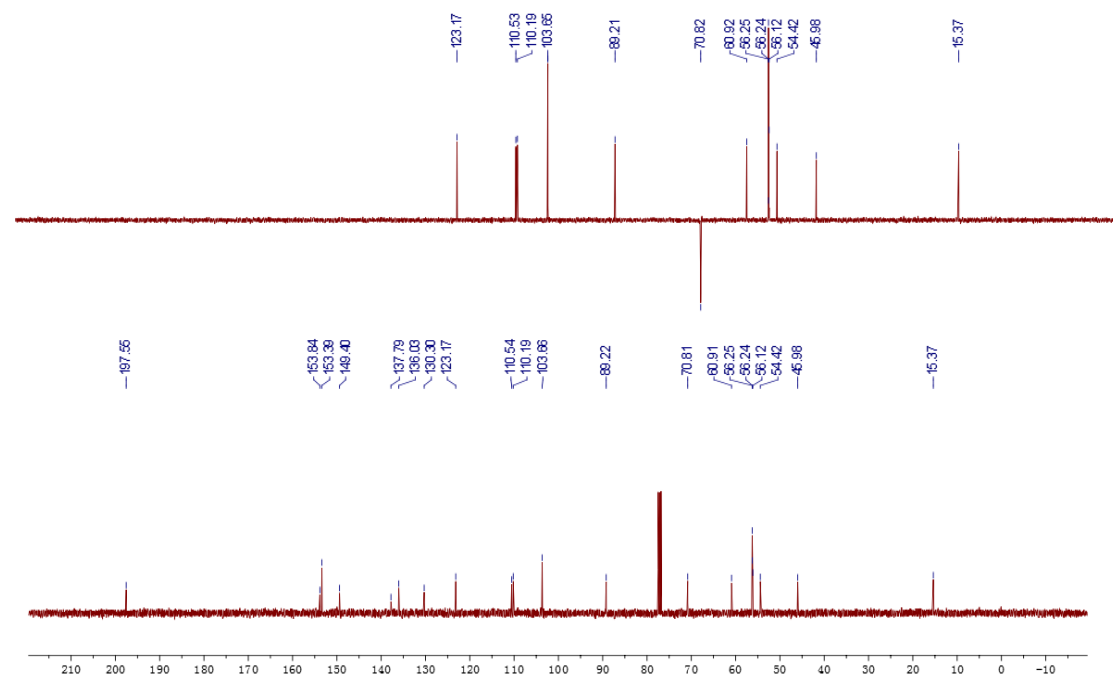

Figure S33. HSQC spectrum of **4** in CDCl<sub>3</sub>

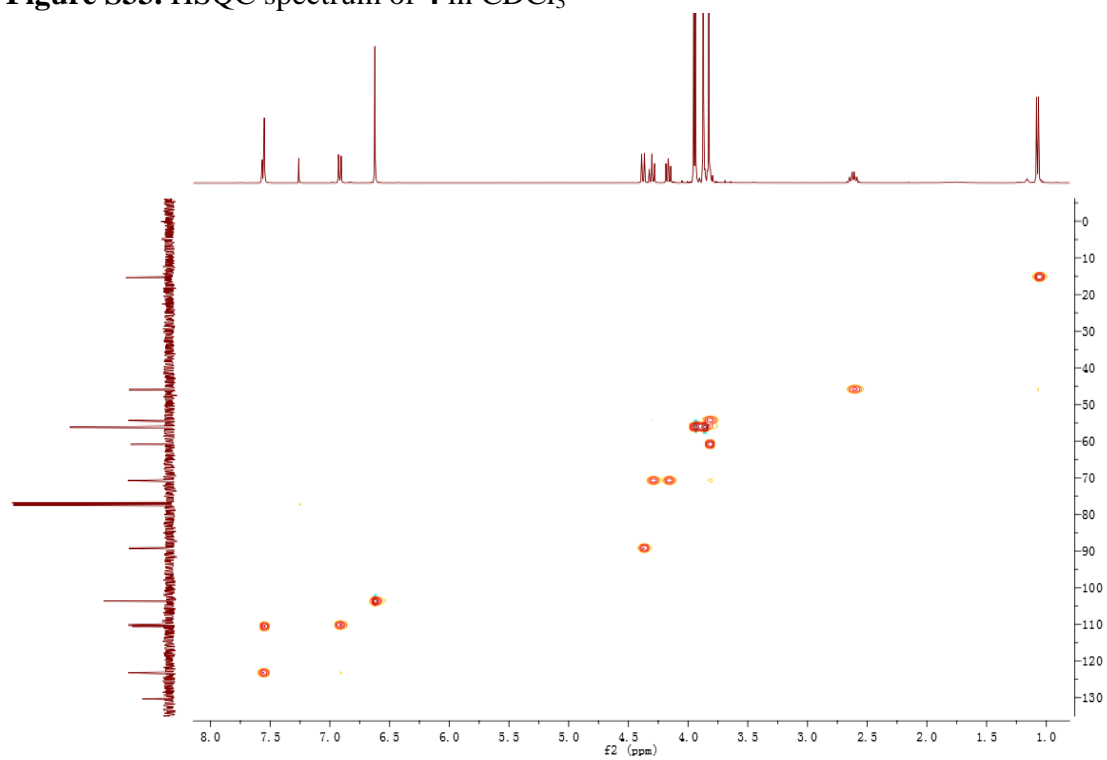

Figure S34. HMBC spectrum of **4** in CDCl<sub>3</sub>

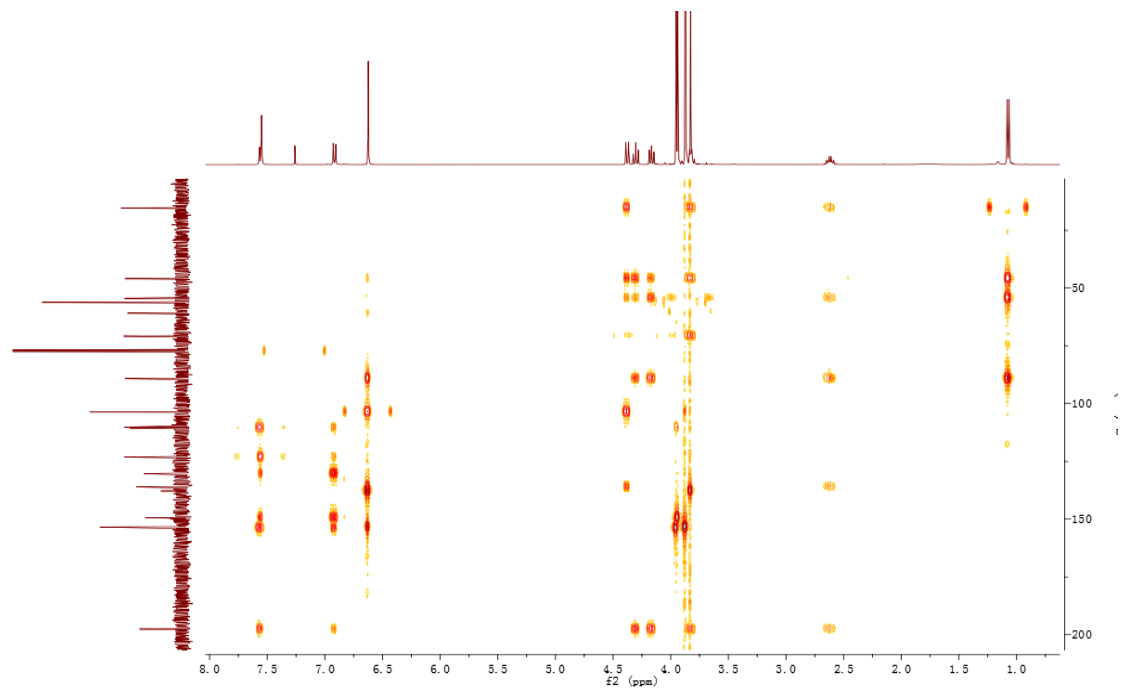

**Figure S35.**  $^1\text{H}$ - $^1\text{H}$  COSY spectrum of **4** in  $\text{CDCl}_3$

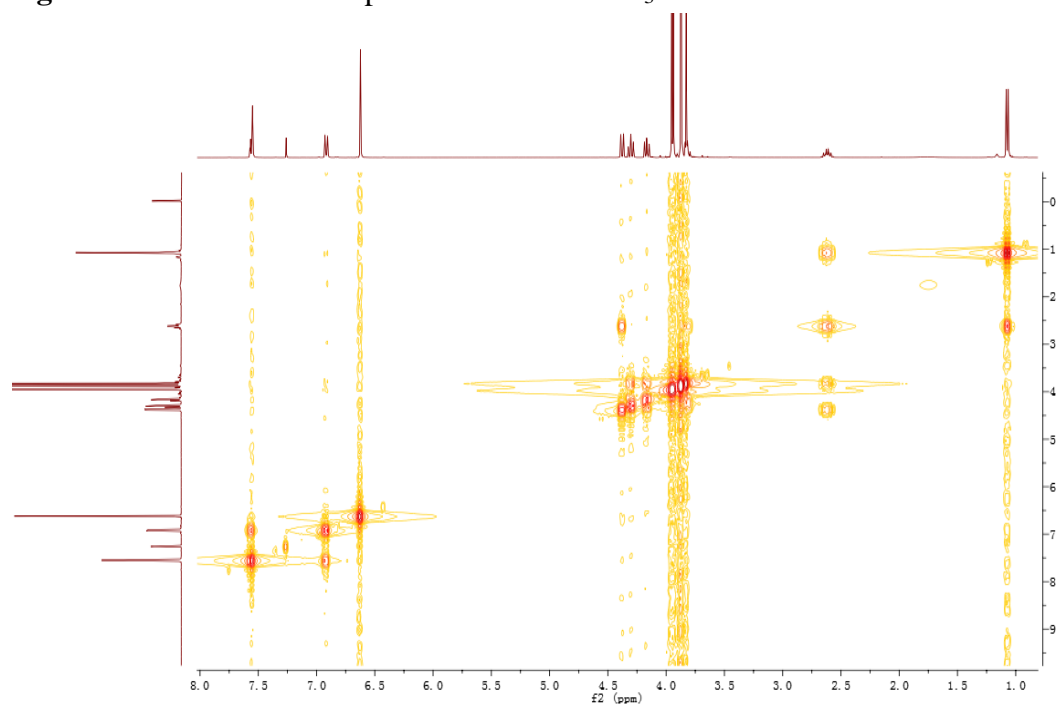

**Figure S36.** NOESY spectrum of **4** in  $\text{CDCl}_3$

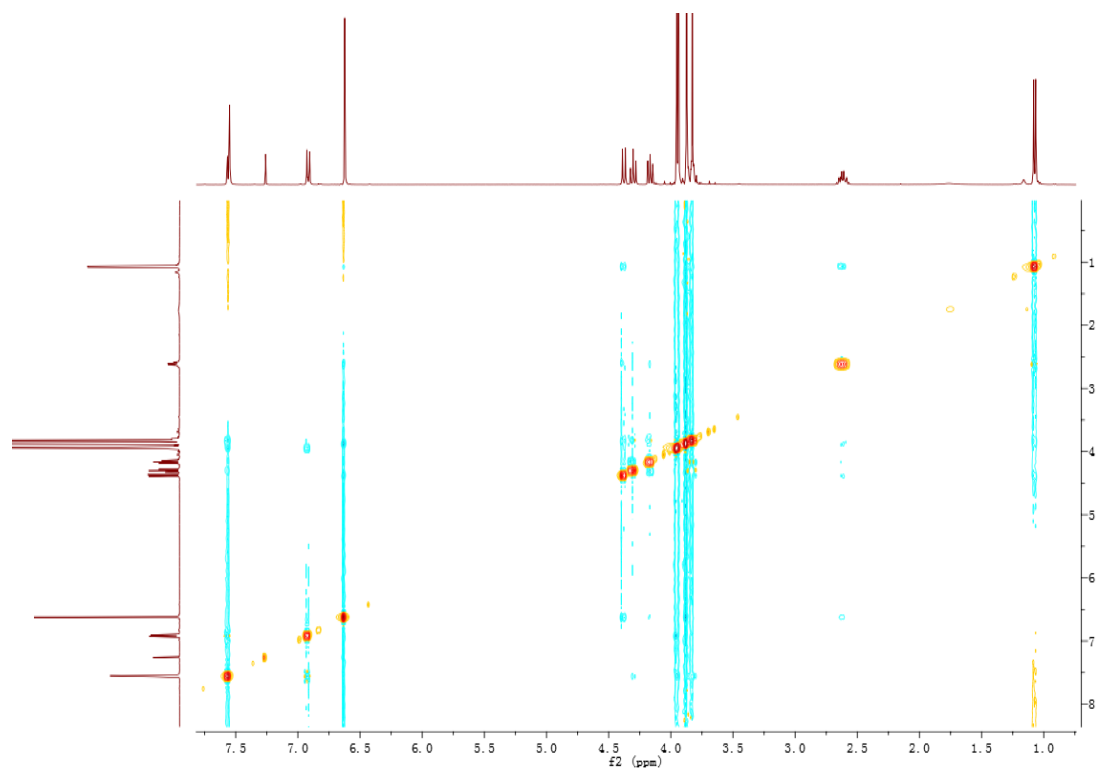

Figure S37. ECD spectrum of **4** in MeOH

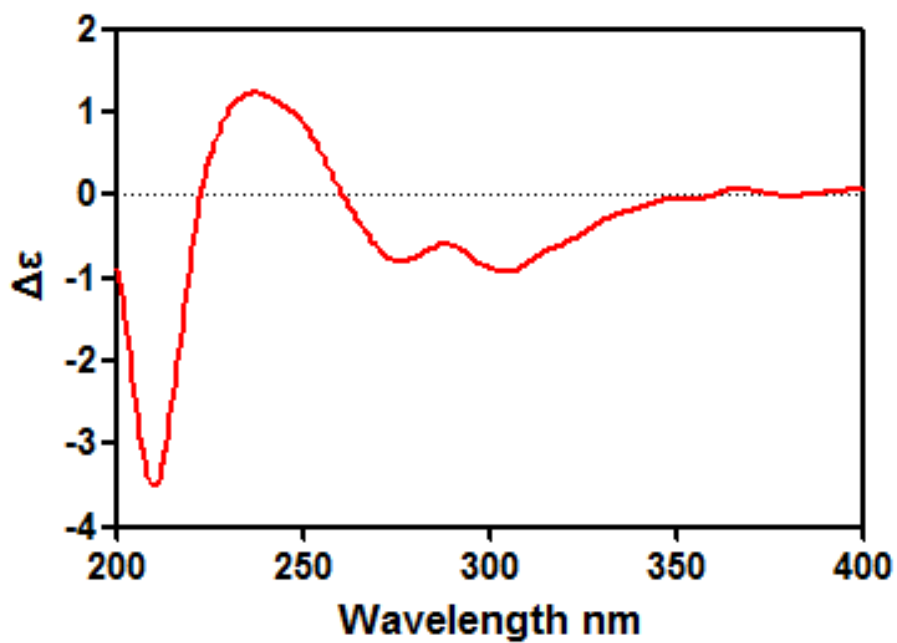

Figure S38. (+)-HR-ESI-MS spectrum of **5**

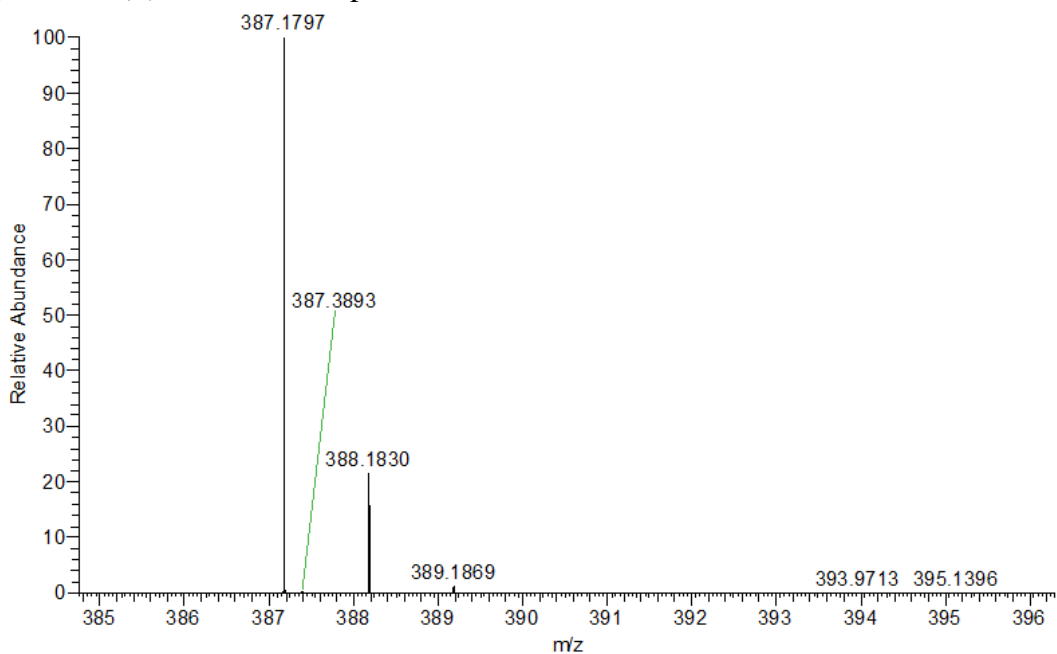

Figure S39. IR spectrum of 5

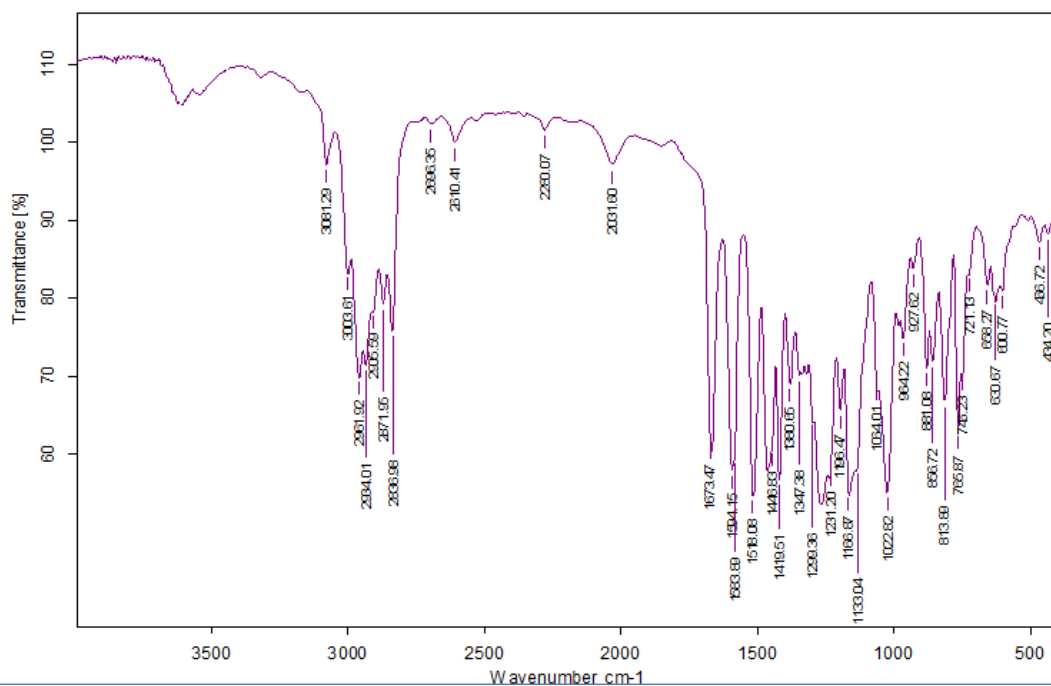

Figure S40. UV spectrum of 5

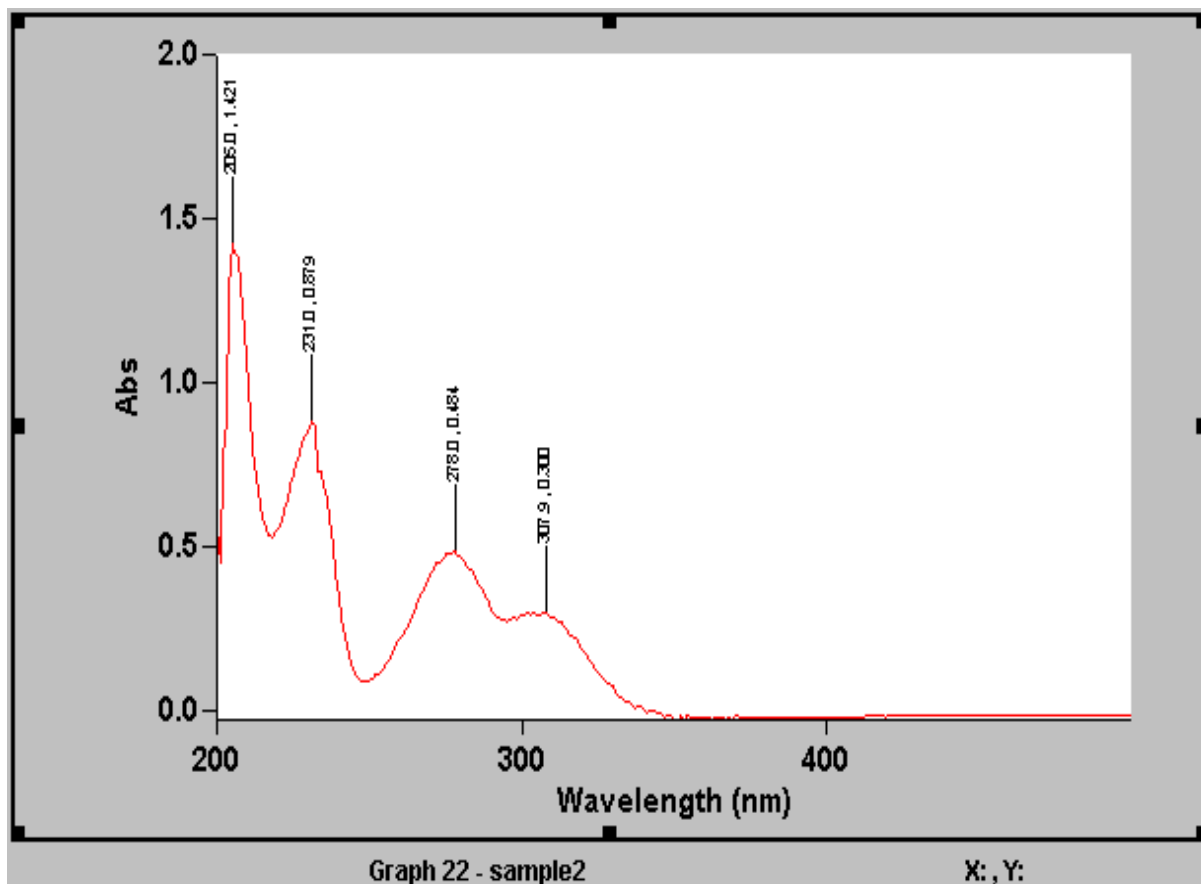



**Figure S41.**  $^1\text{H}$  NMR spectrum of **5** in  $\text{CD}_3\text{OD}$

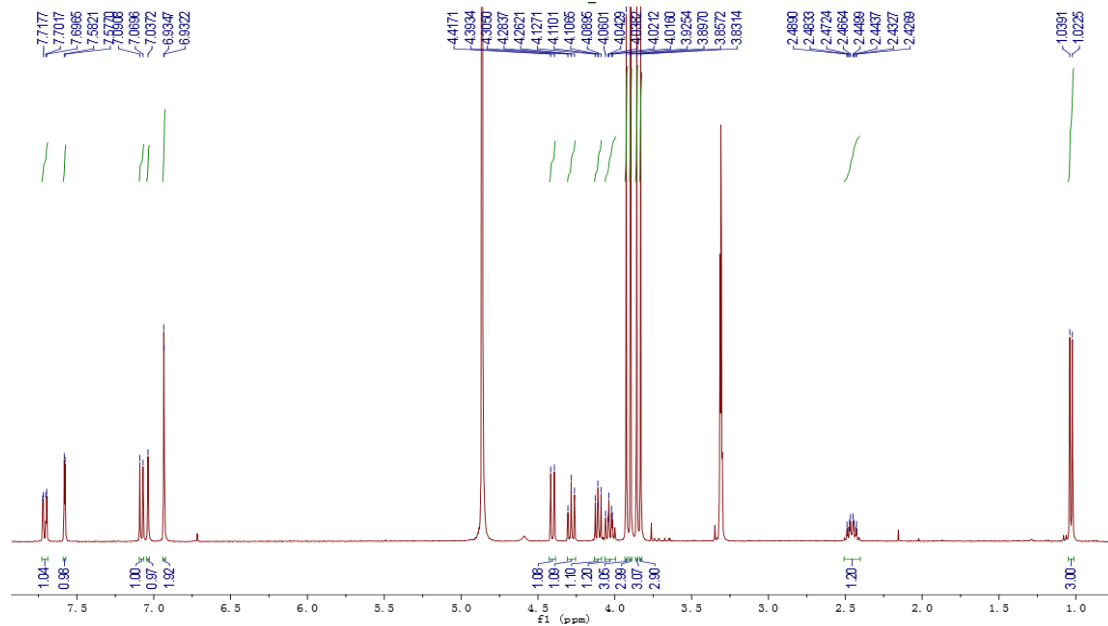

**Figure S42.**  $^{13}\text{C}$  NMR spectrum of **5** in  $\text{CD}_3\text{OD}$

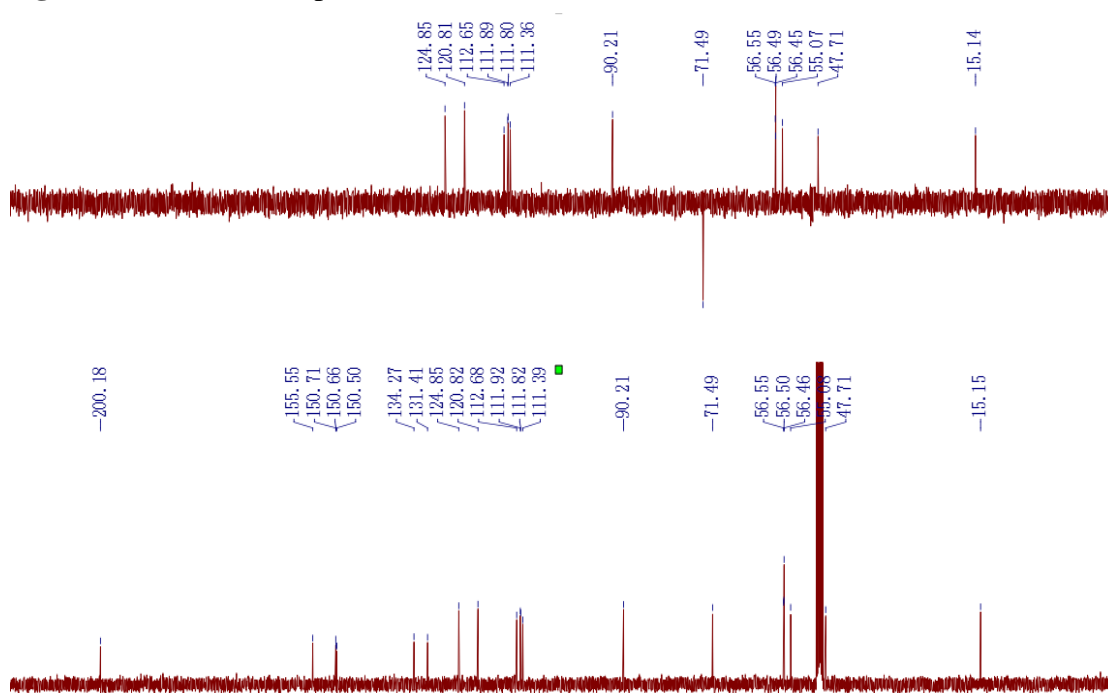

**Figure S43.** HSQC spectrum of **5** in CD<sub>3</sub>OD

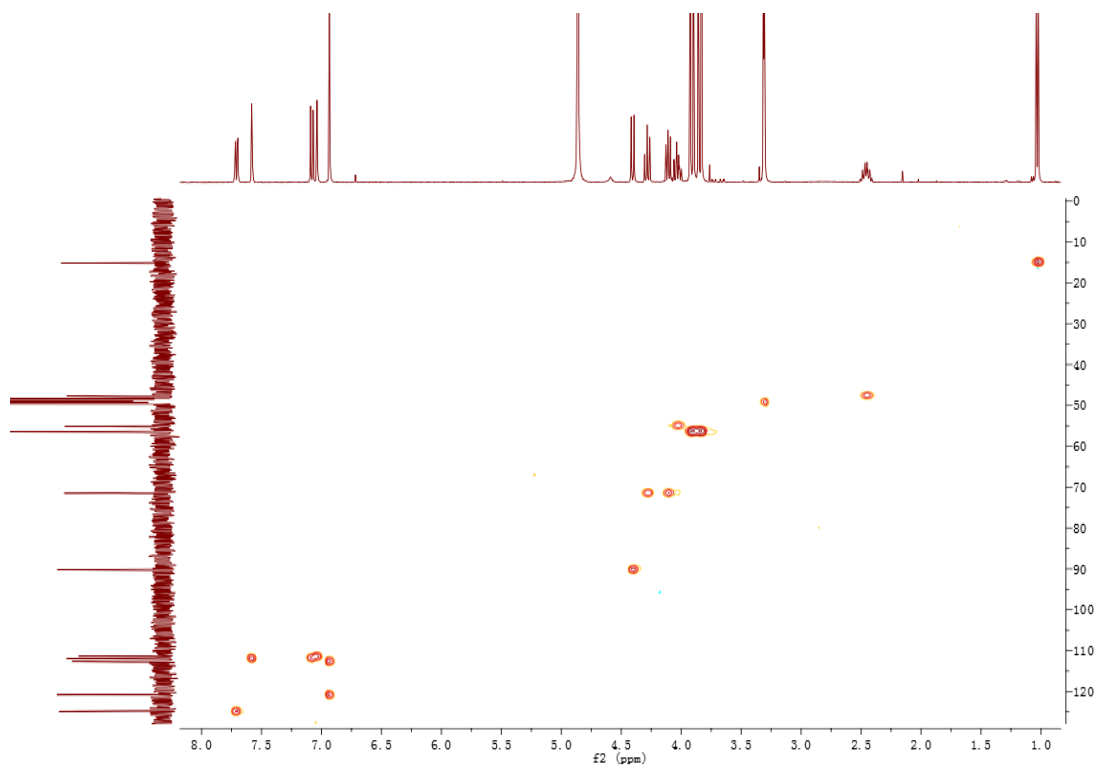

**Figure S44.** HMBC spectrum of **5** in CD<sub>3</sub>OD

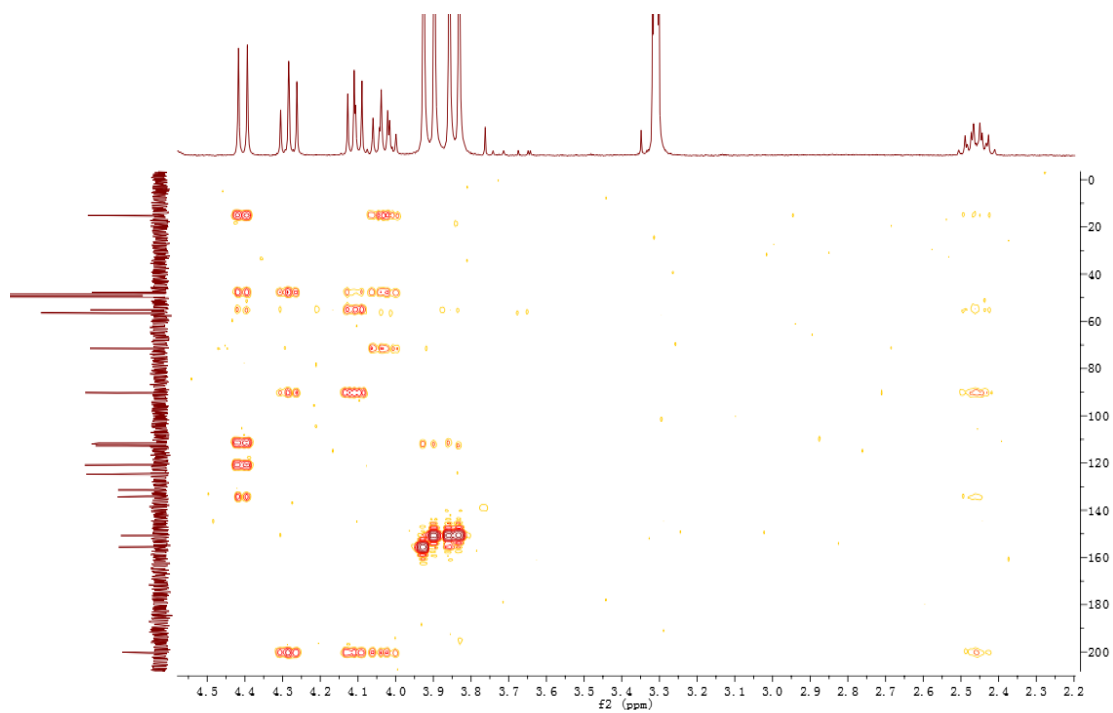

**Figure S45.**  $^1\text{H}$ - $^1\text{H}$  COSY spectrum of **5** in  $\text{CD}_3\text{OD}$

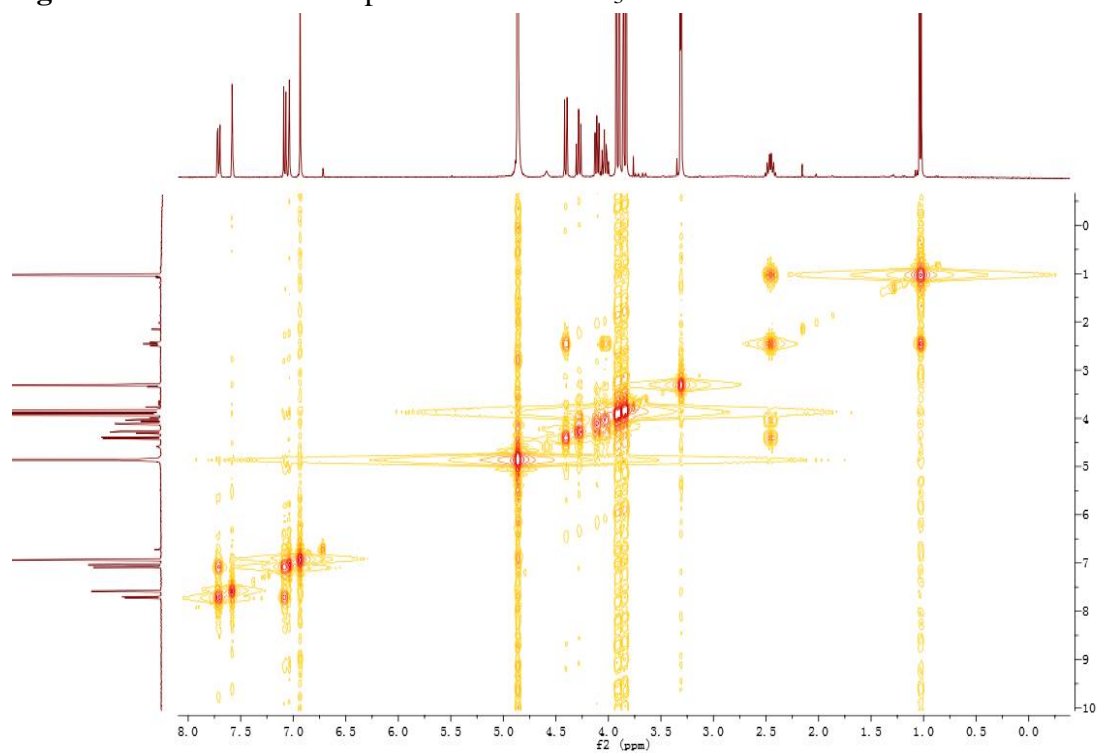

**Figure S46.** NOESY spectrum of **5** in  $\text{CD}_3\text{OD}$

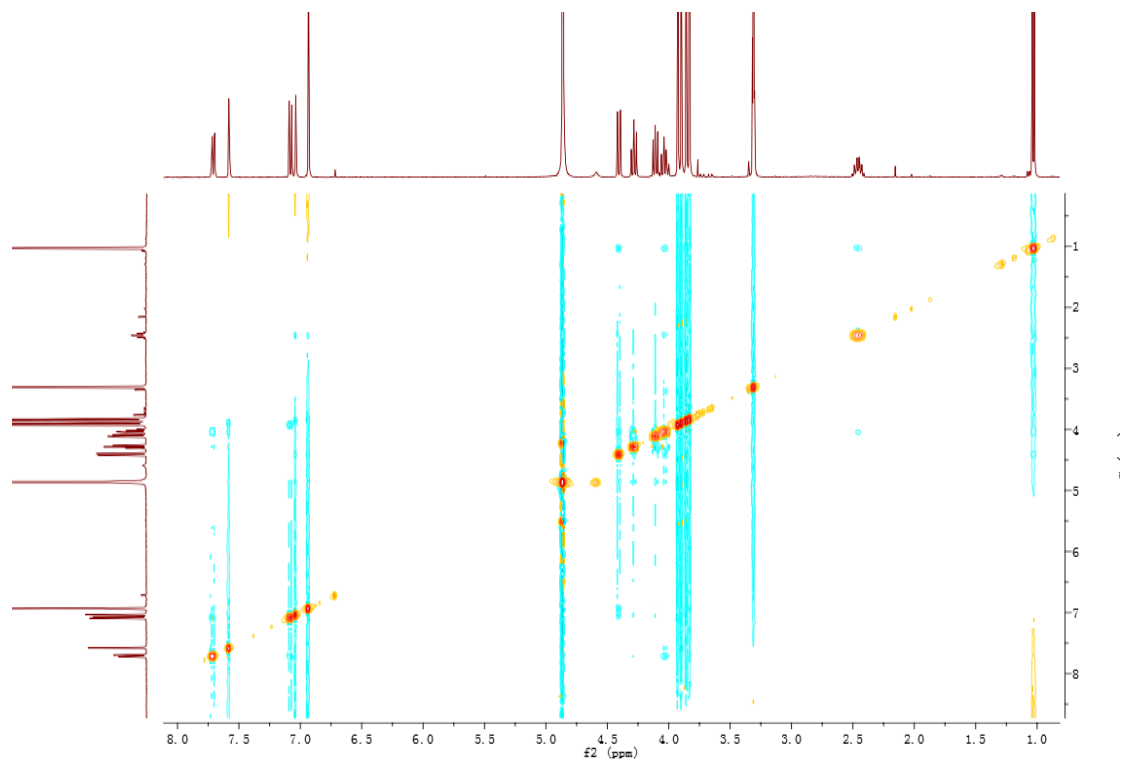

Figure S47. ECD spectrum of **5** in MeOH

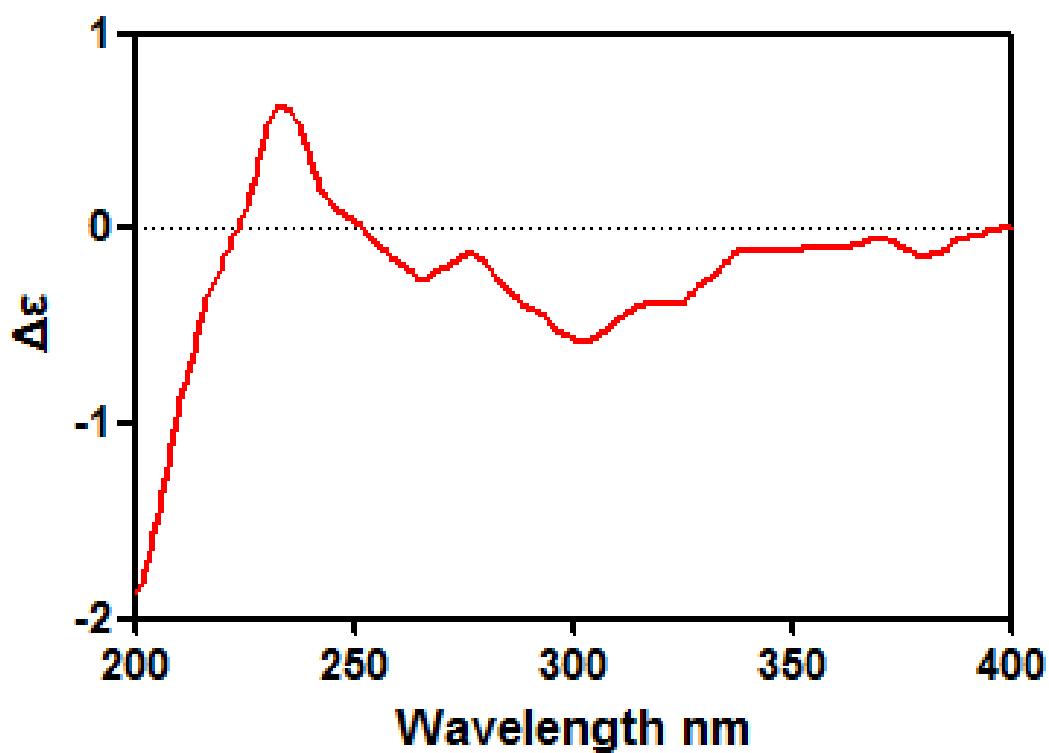

Figure S48. (+)-HR-ESI-MS spectrum of **6**

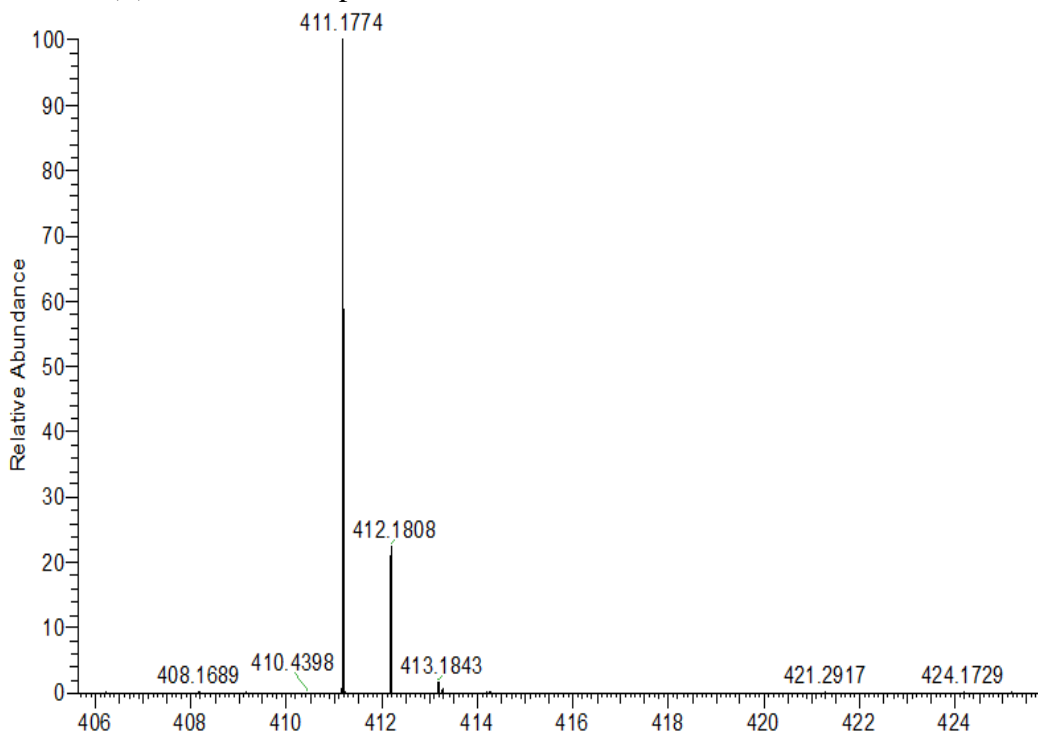

**Figure S49.** IR spectrum of **6** (**6a/6b**)

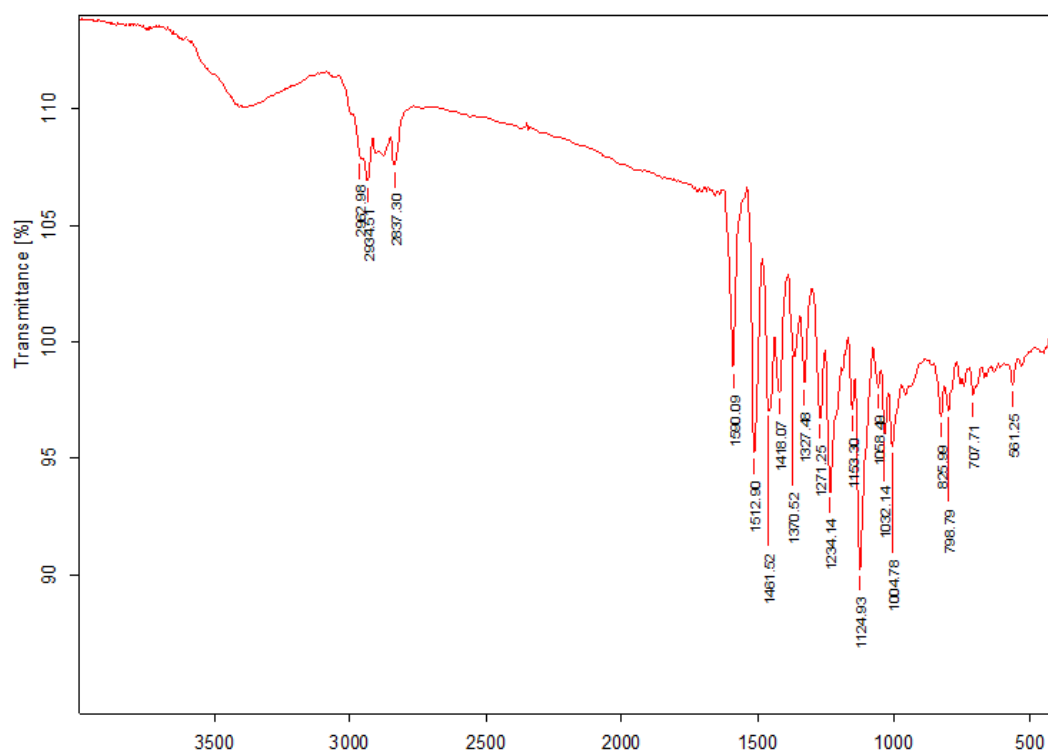

**Figure S50.** UV spectrum of **6**

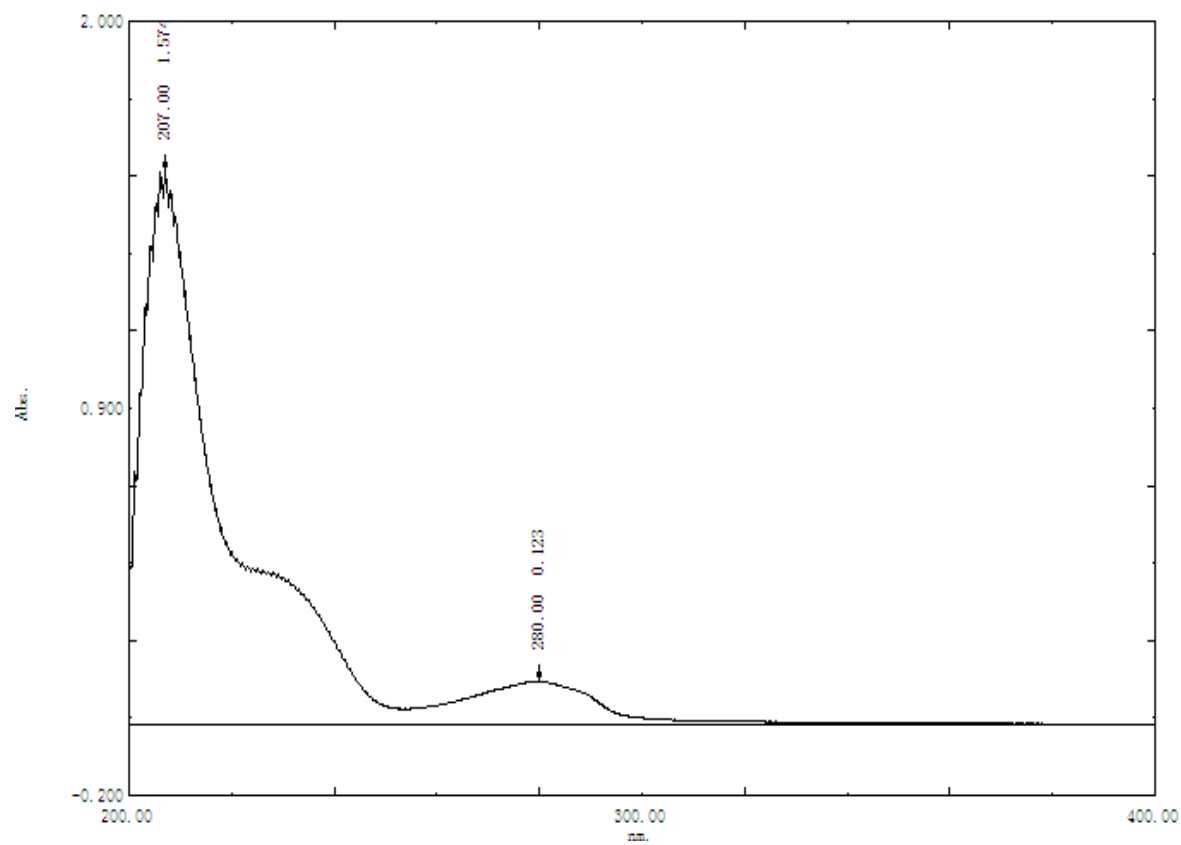

**Figure S51.**  $^1\text{H}$  NMR spectrum of **6** in  $\text{CD}_3\text{OD}$

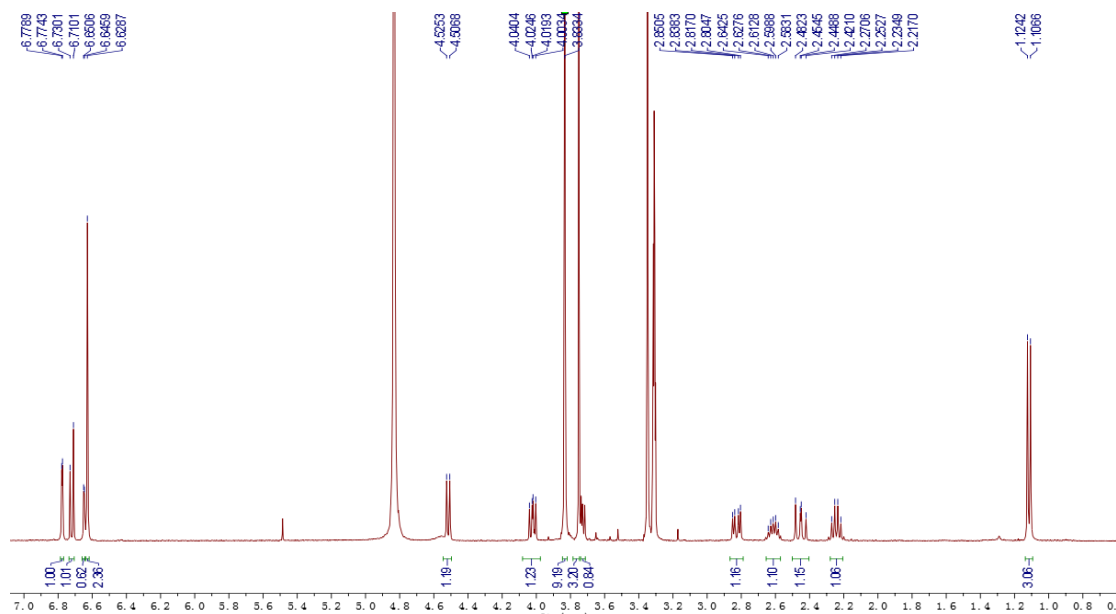

**Figure S52.**  $^{13}\text{C}$  NMR spectrum of **6** in  $\text{CD}_3\text{OD}$

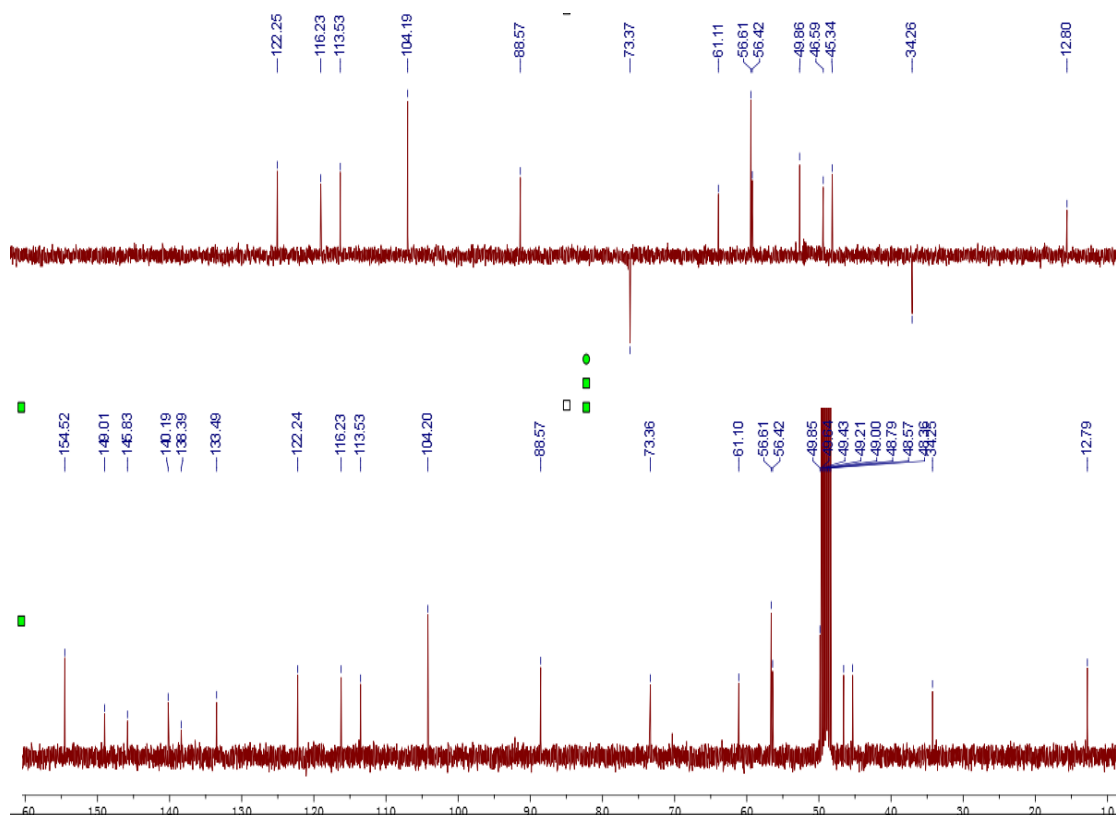

Figure S53. HSQC spectrum of **6** in CD<sub>3</sub>OD

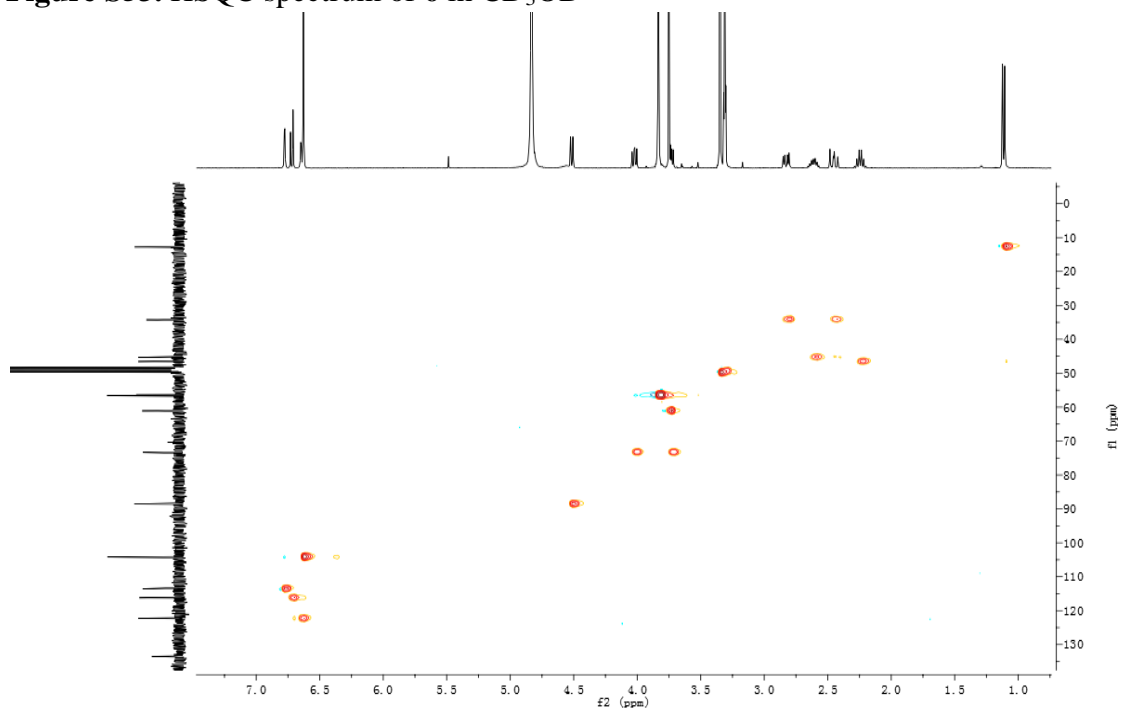

Figure S54. HMBC spectrum of **6** in CD<sub>3</sub>OD

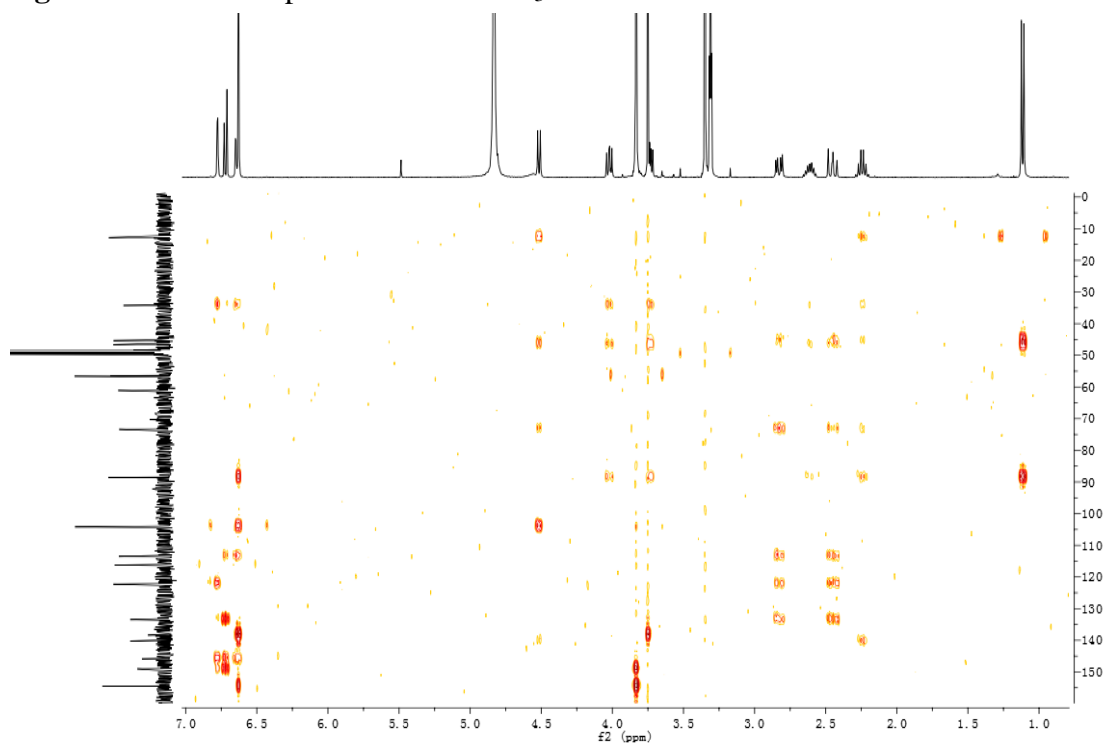

**Figure S55.**  $^1\text{H}$ - $^1\text{H}$  COSY spectrum of **6** in  $\text{CD}_3\text{OD}$

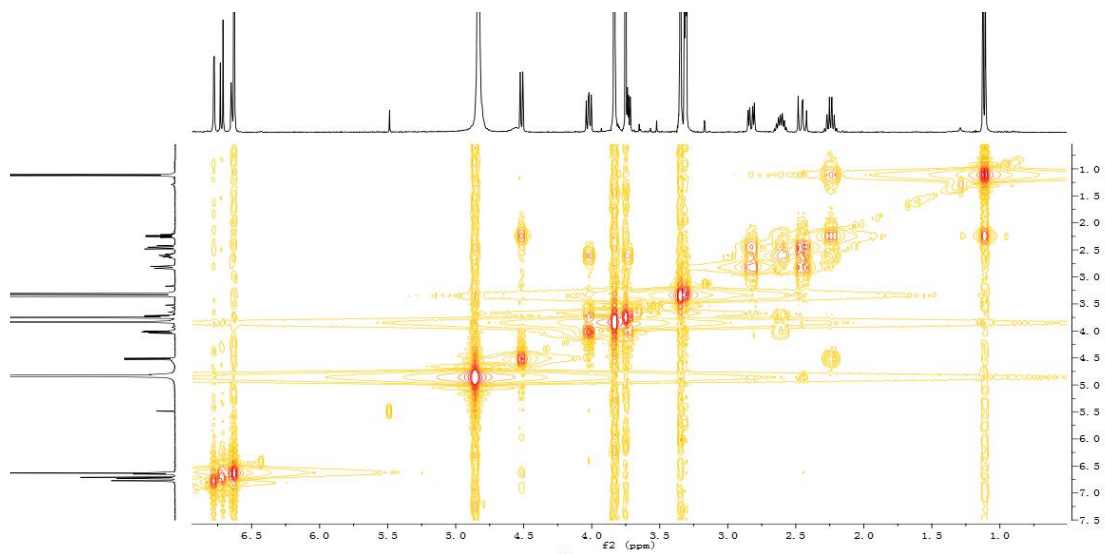

**Figure S56.** NOESY spectrum of **6** in  $\text{CD}_3\text{OD}$

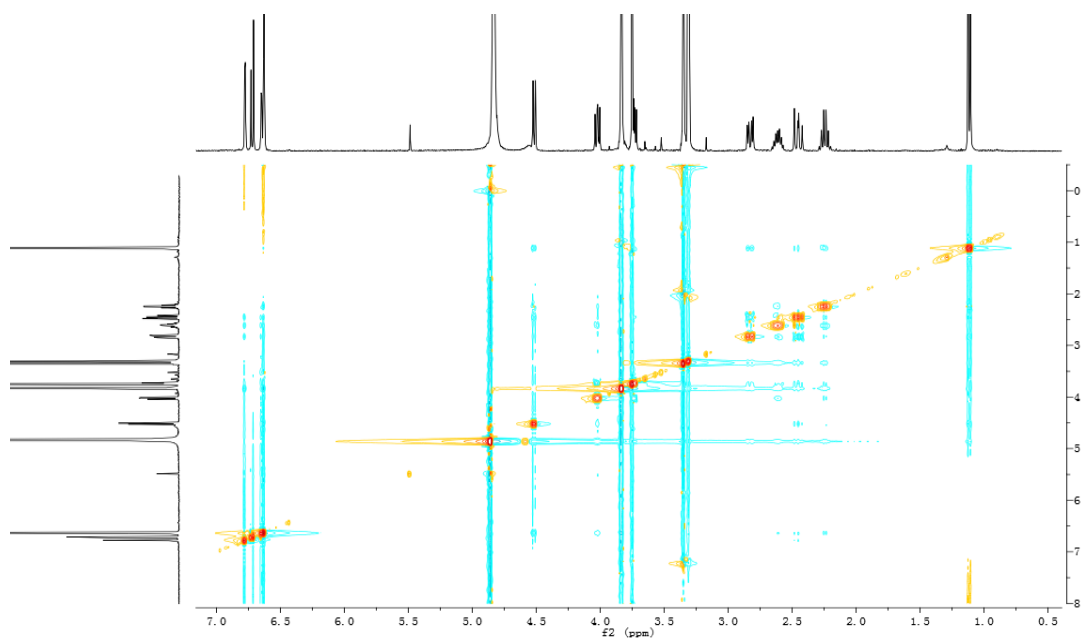



Figure S57. ECD spectrum of **6** in MeOH

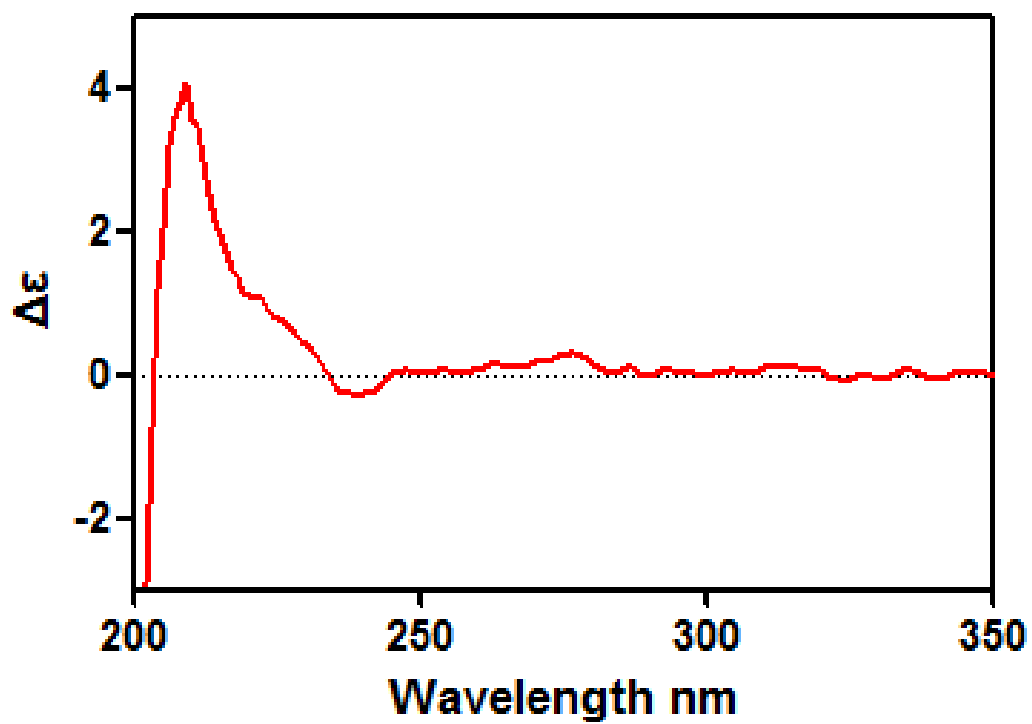

Figure S58. (+)-HR-ESI-MS spectrum of **7**

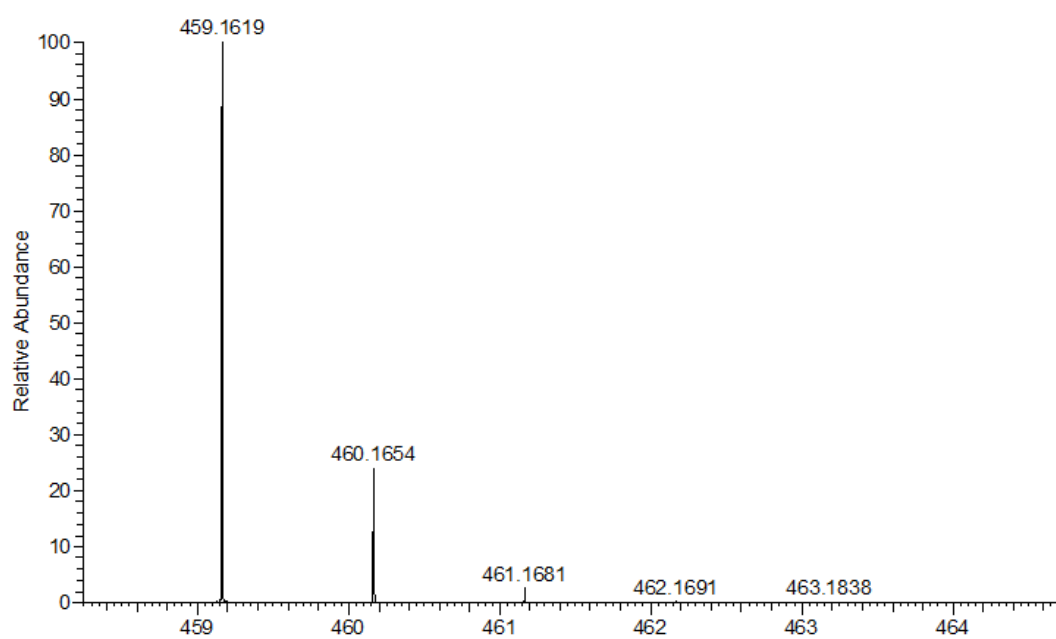

Figure S59. IR spectrum of 7

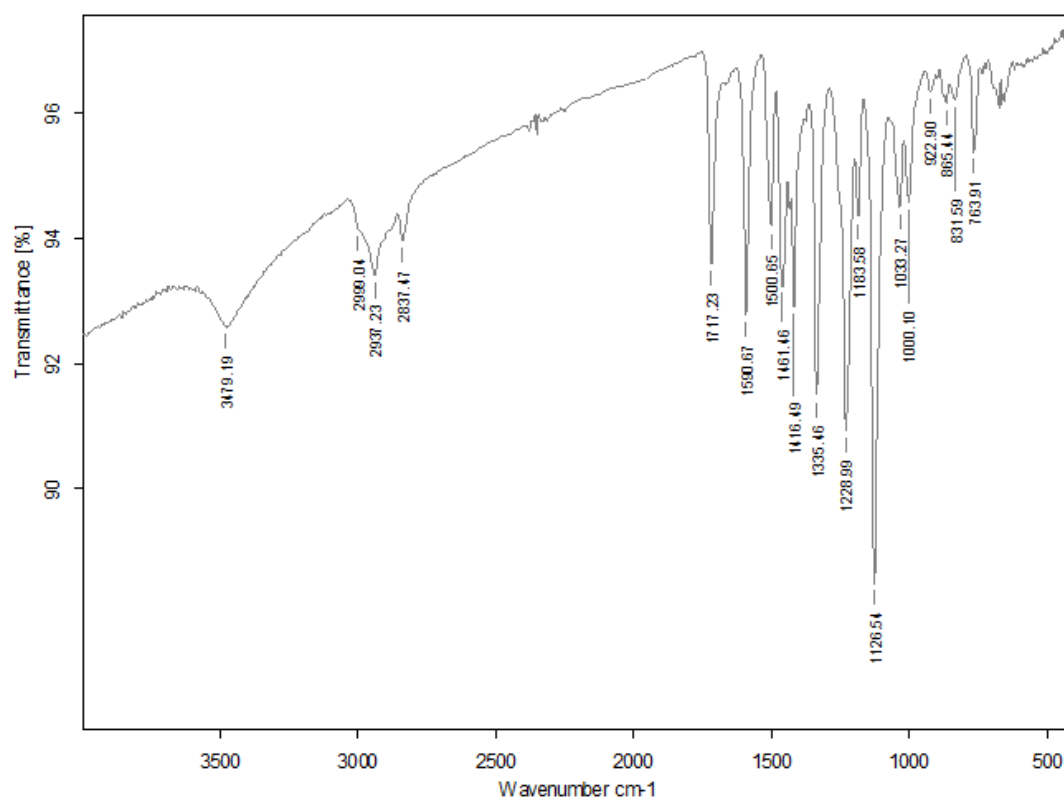

Figure S60. UV spectrum of 7

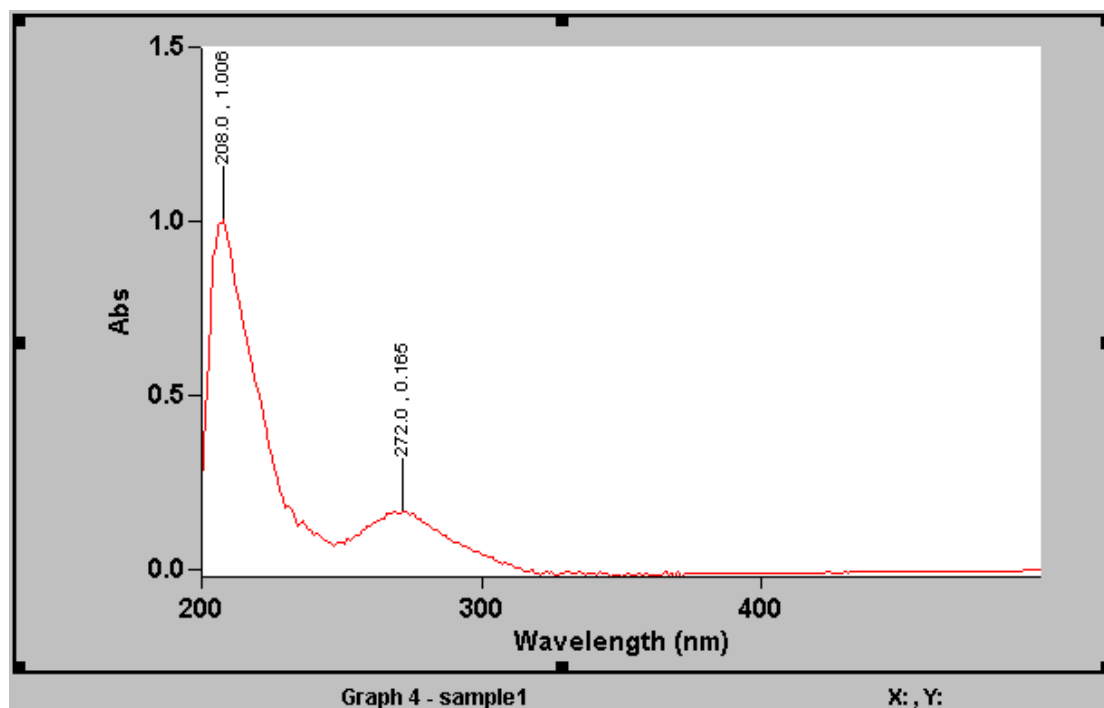

**Figure S61.**  $^1\text{H}$  NMR spectrum of **7** in  $\text{CD}_3\text{OD}$

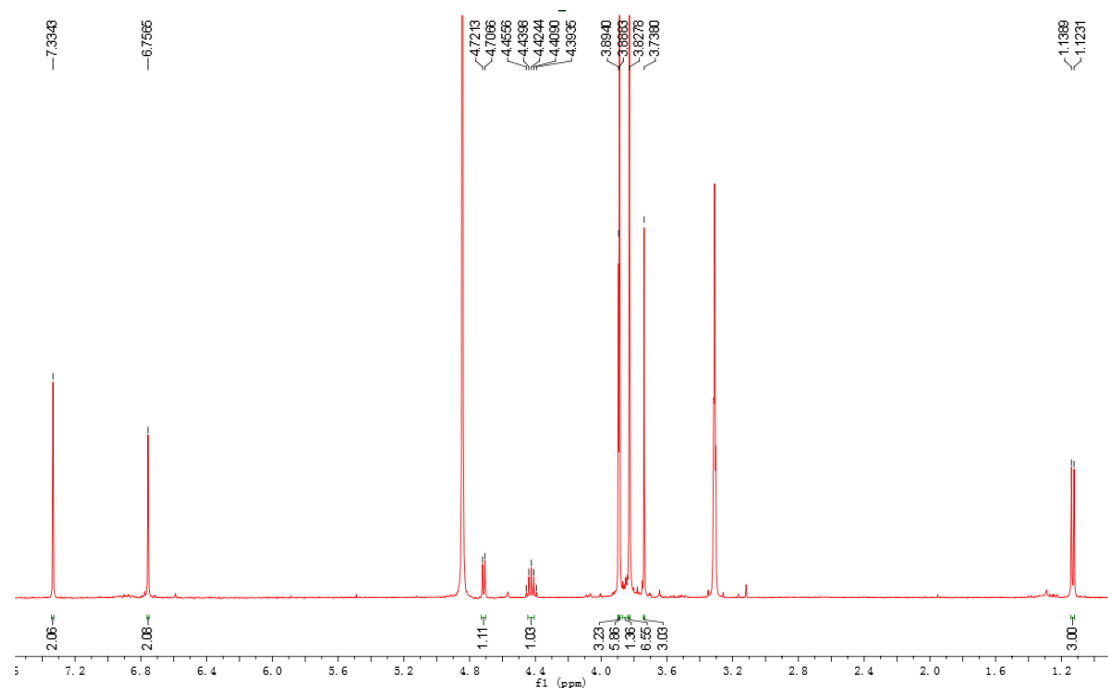

**Figure S62.**  $^{13}\text{C}$  NMR spectrum of **7** in  $\text{CD}_3\text{OD}$

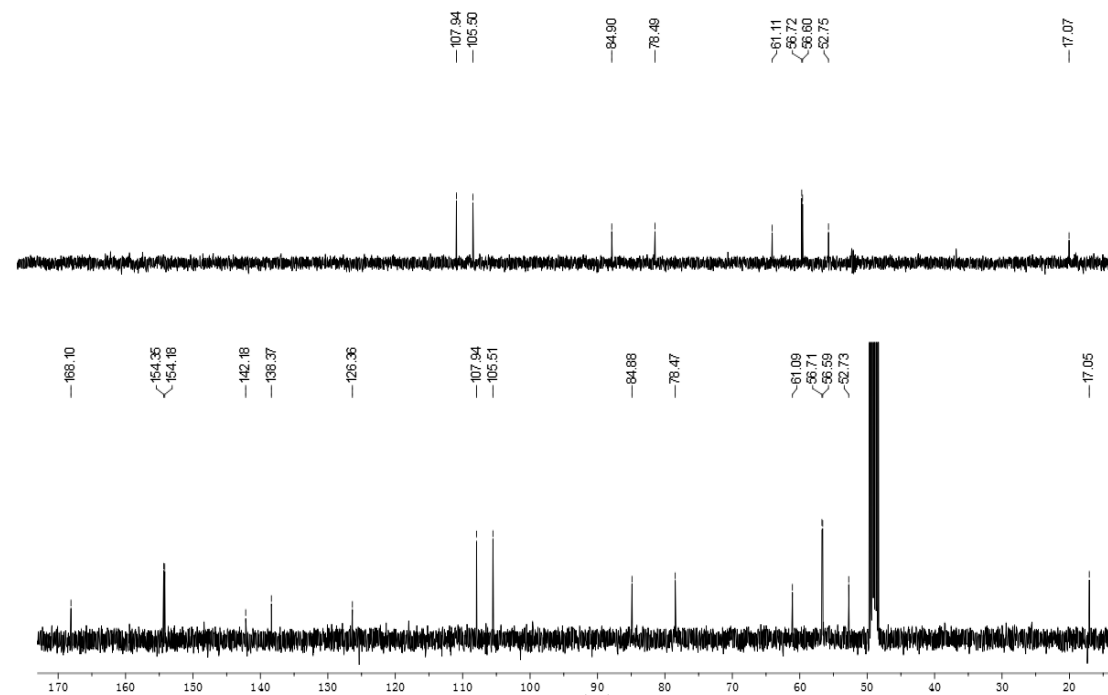

**Figure S63.** HSQC spectrum of **7** in CD<sub>3</sub>OD

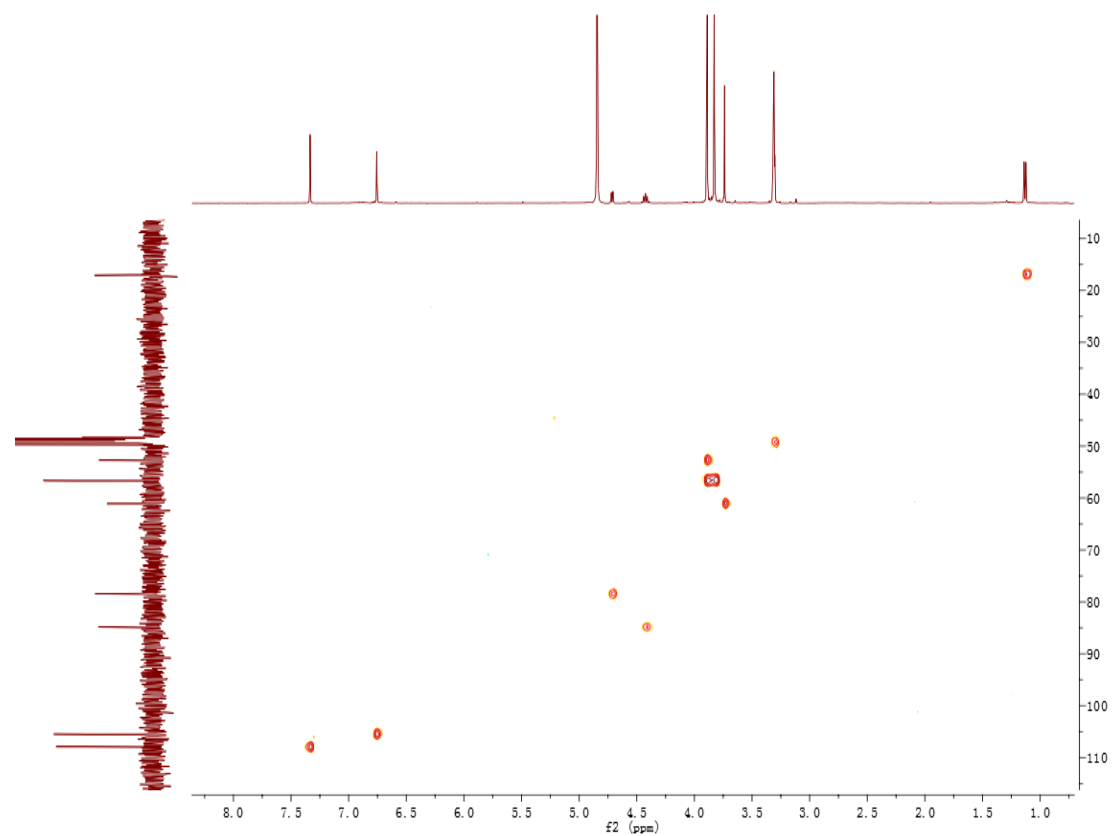

**Figure S64.** HMBC spectrum of **7** in CD<sub>3</sub>OD

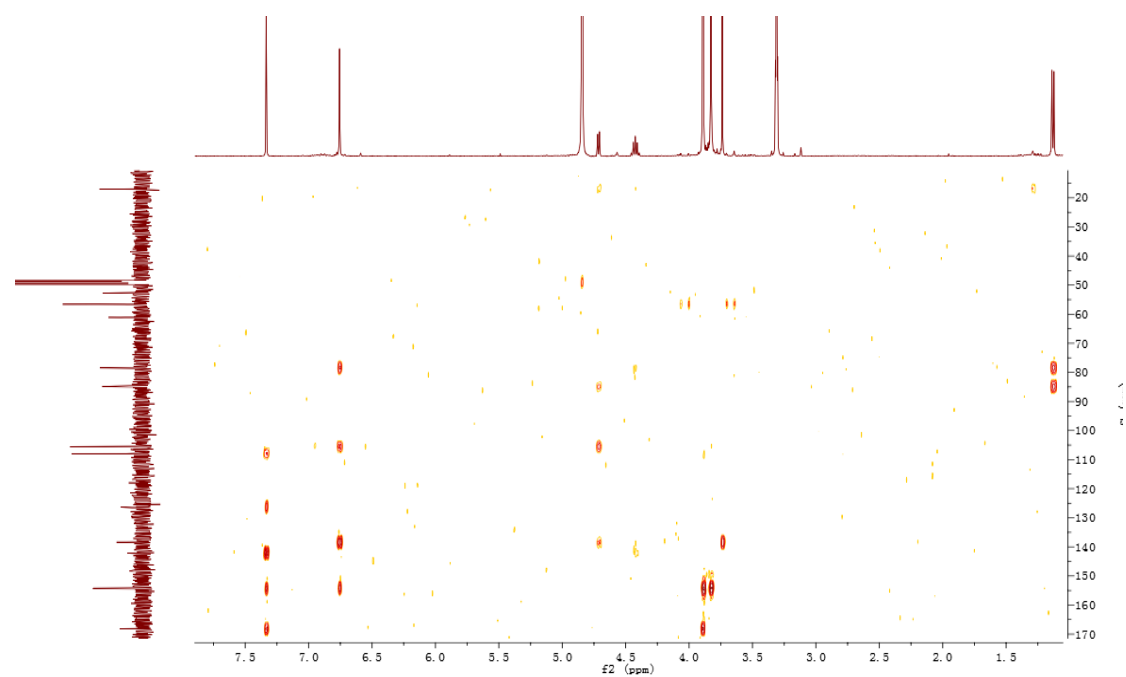

**Figure S65.**  $^1\text{H}$ - $^1\text{H}$  COSY spectrum of **7** in  $\text{CD}_3\text{OD}$

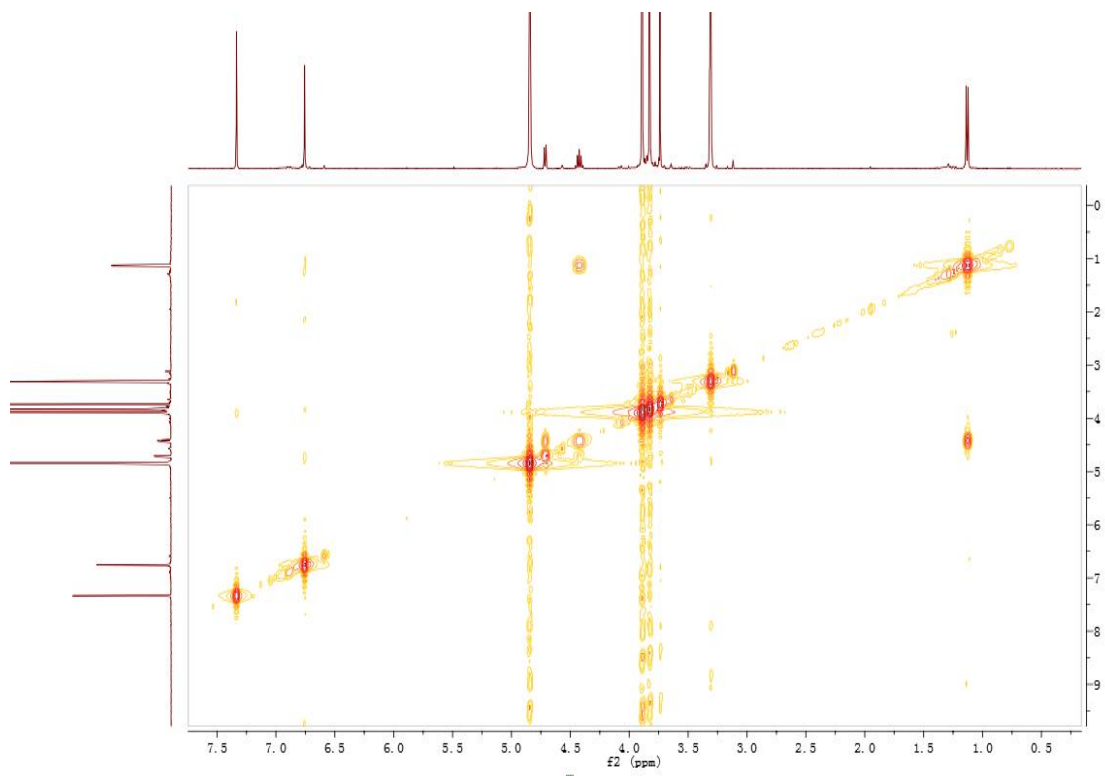

**Figure S66.** NOESY spectrum of **7** in  $\text{CD}_3\text{OD}$

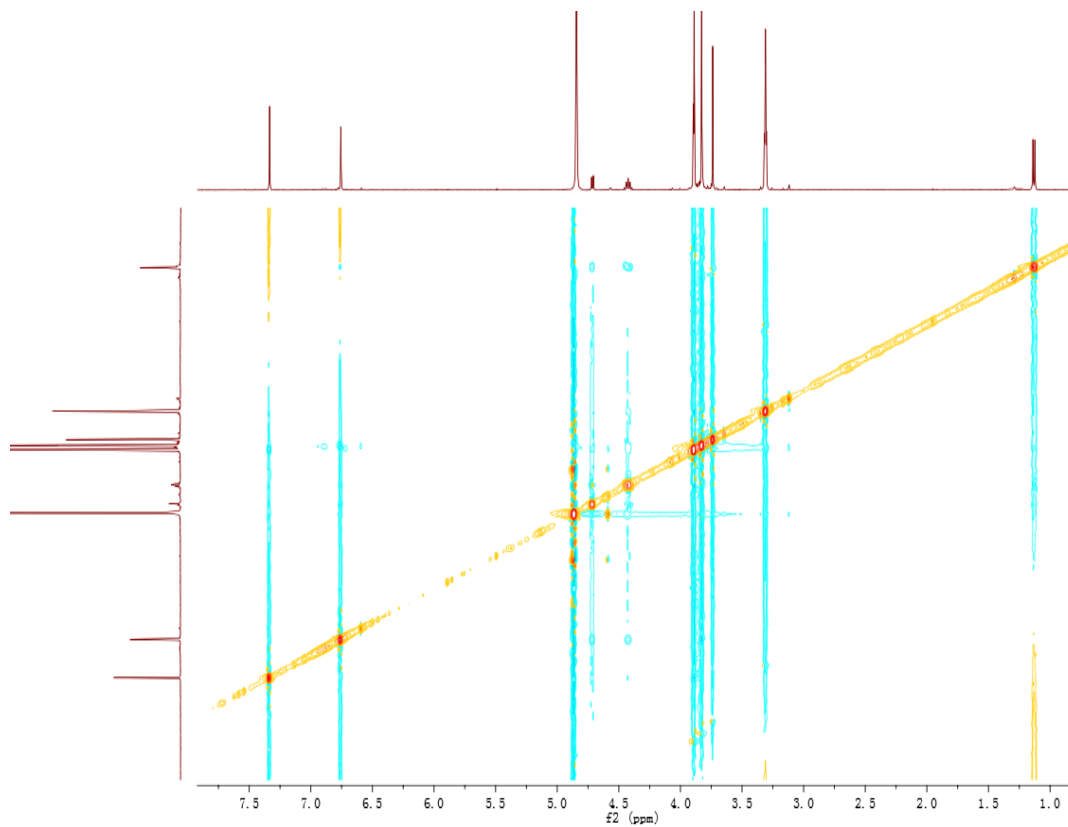

Figure S67. ECD spectrum of **7** in MeOH

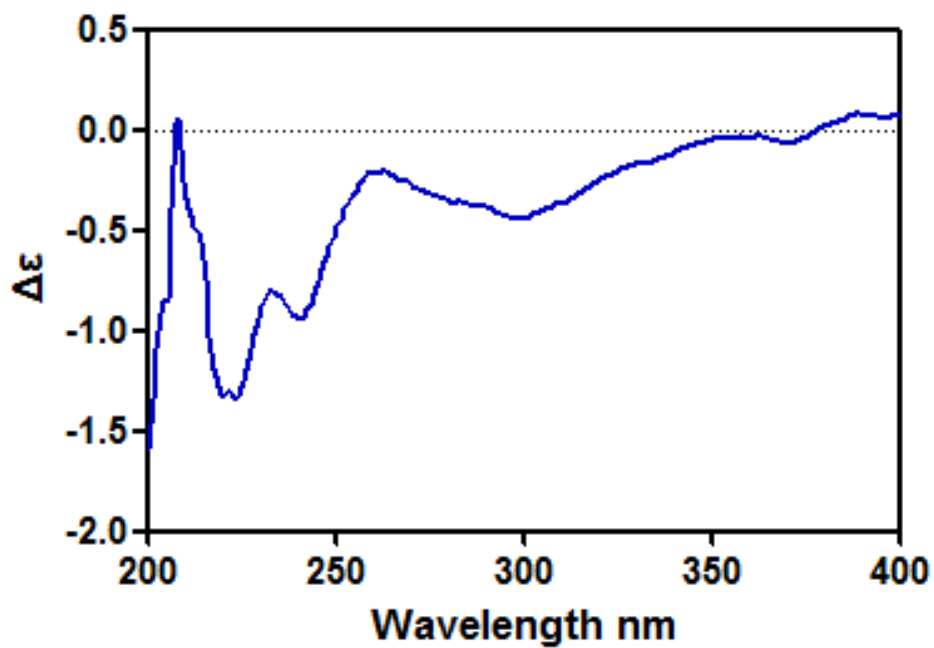

Figure S68. (+)-HR-ESI-MS spectrum of **8**

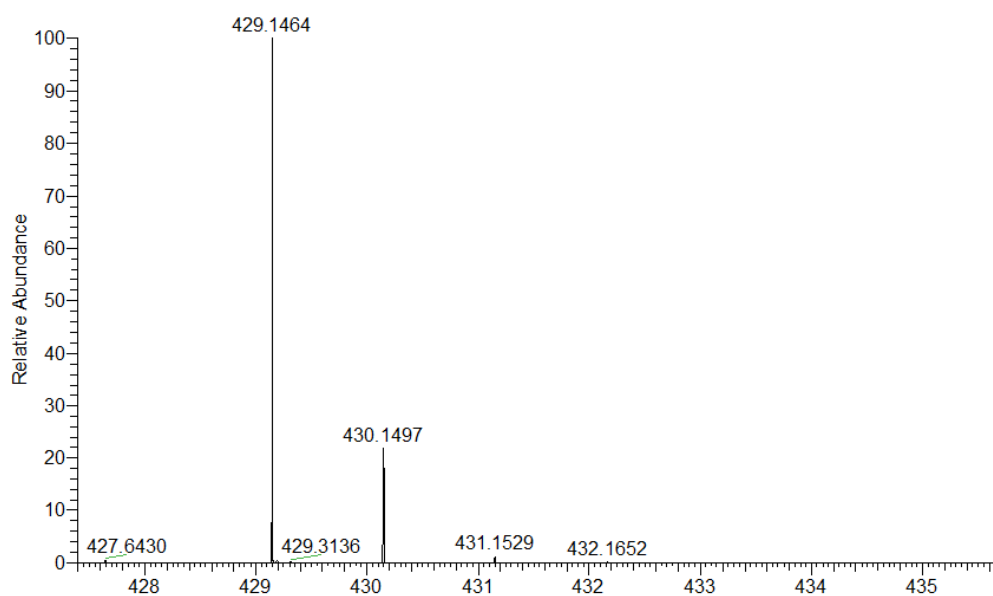

Figure S69. IR spectrum of 8

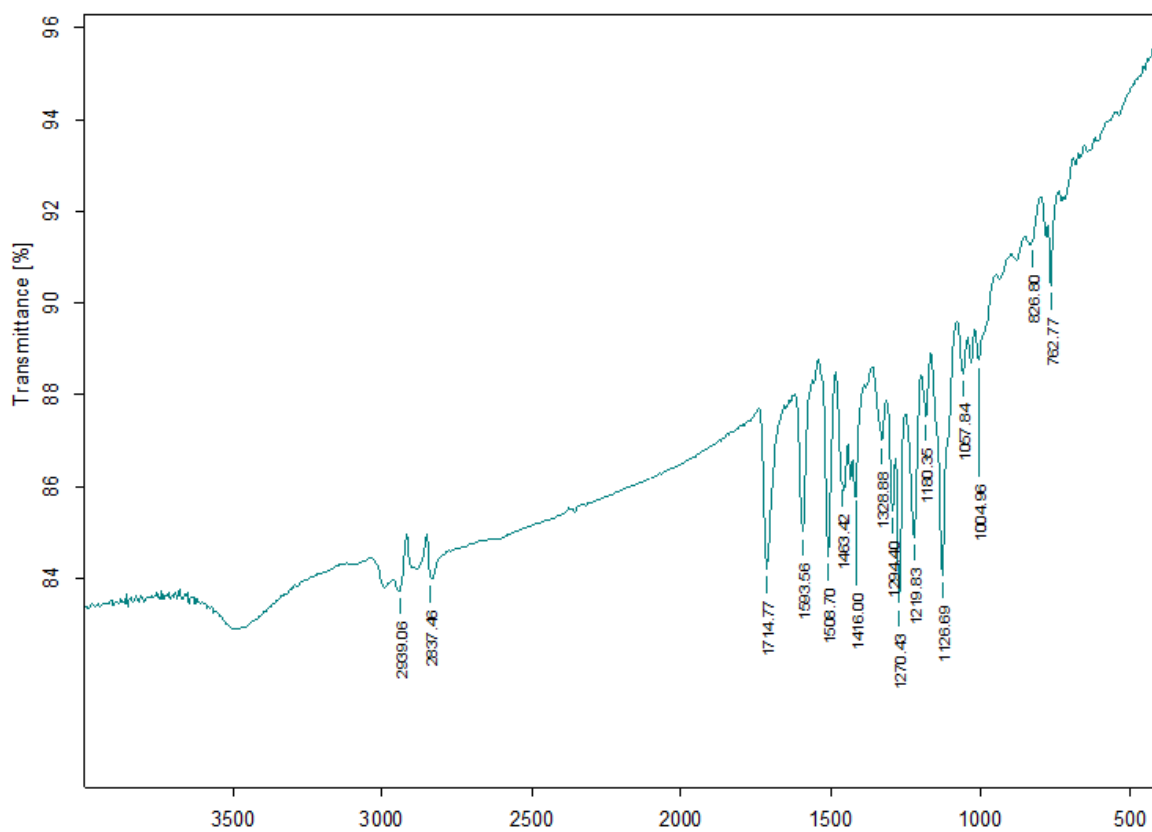

Figure S70. UV spectrum of 8

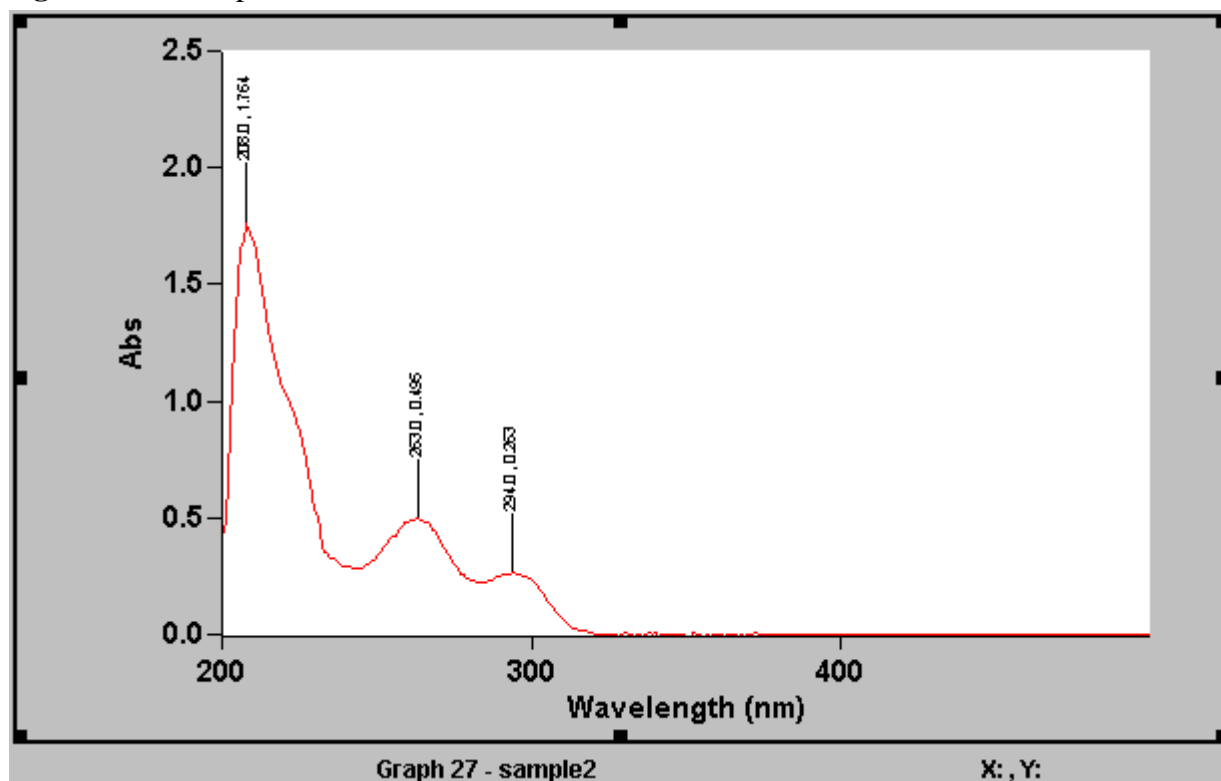

**Figure S71.**  $^1\text{H}$  NMR spectrum of **8** in  $\text{CD}_3\text{OD}$

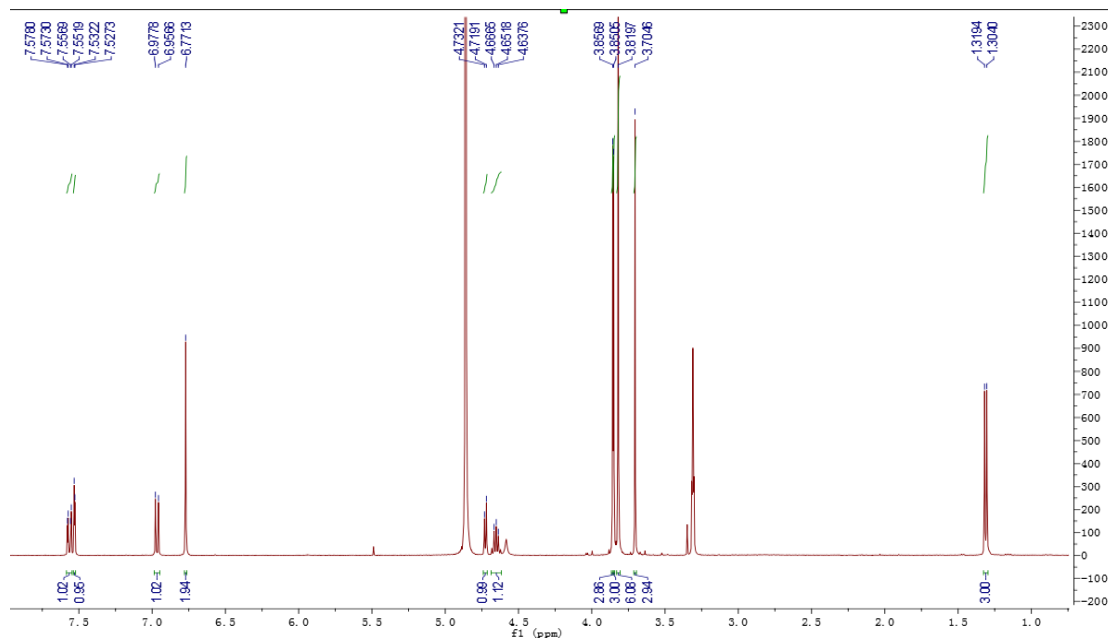

**Figure S72.**  $^{13}\text{C}$  NMR spectrum of **8** in  $\text{CD}_3\text{OD}$

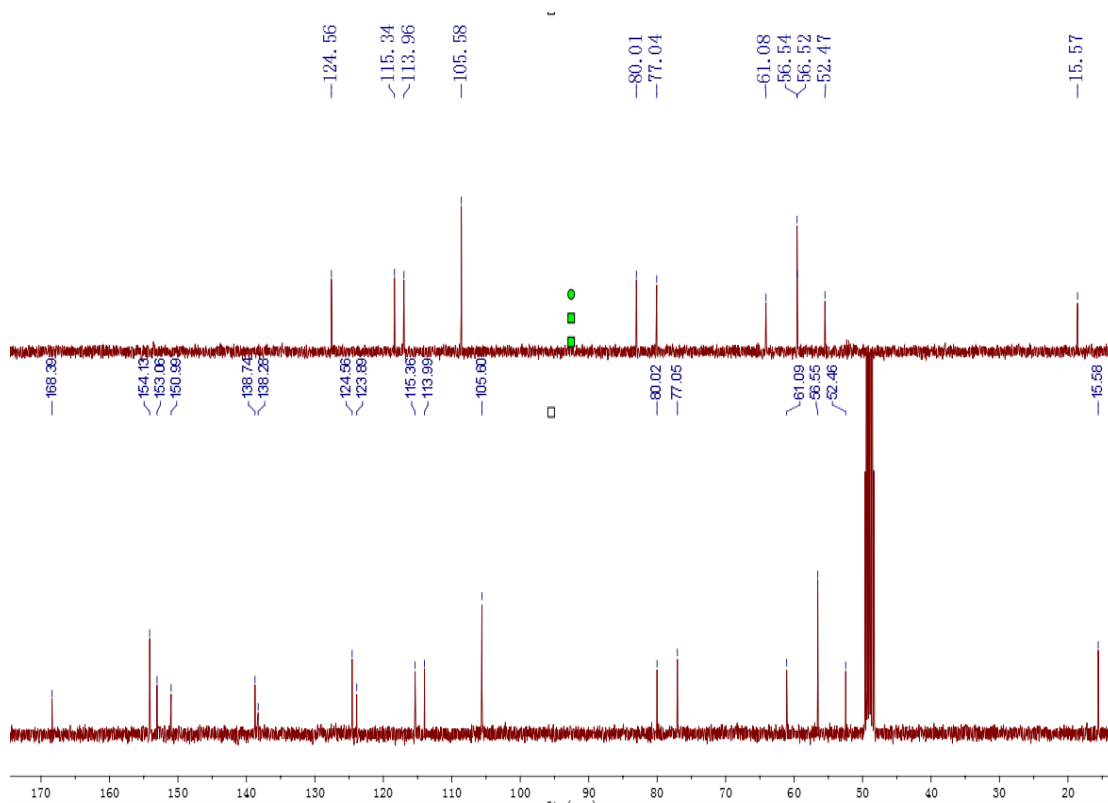



**Figure S73.** HSQC spectrum of **8** in CD<sub>3</sub>OD

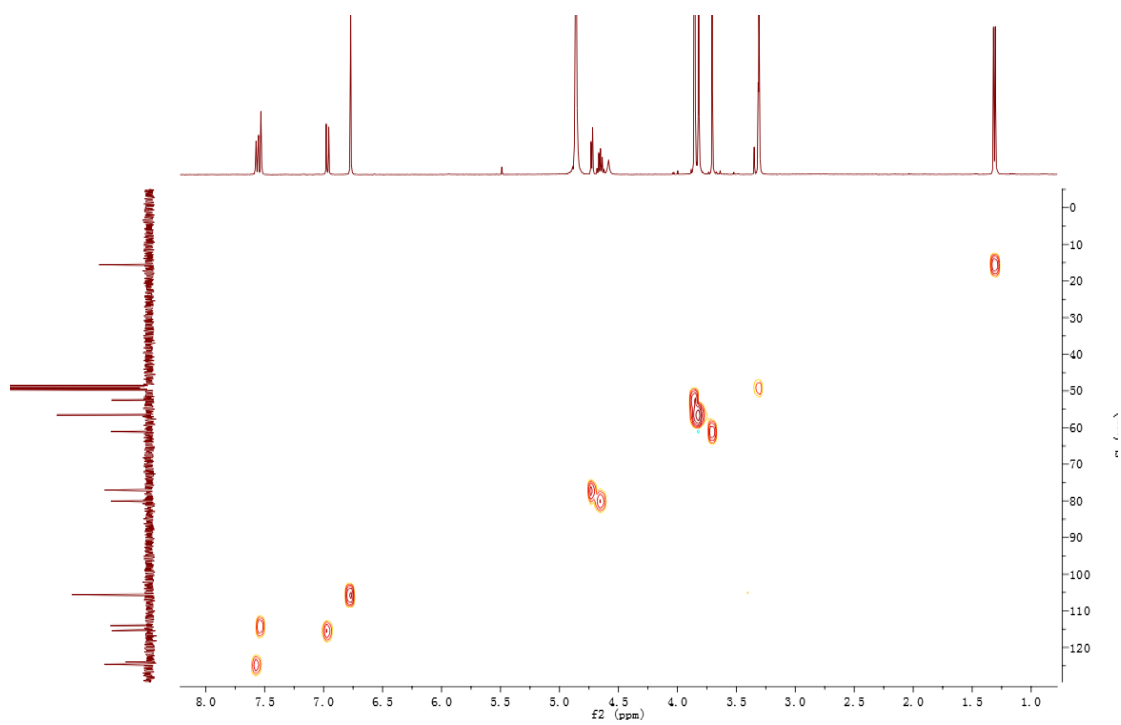

**Figure S74.** HMBC spectrum of **8** in CD<sub>3</sub>OD

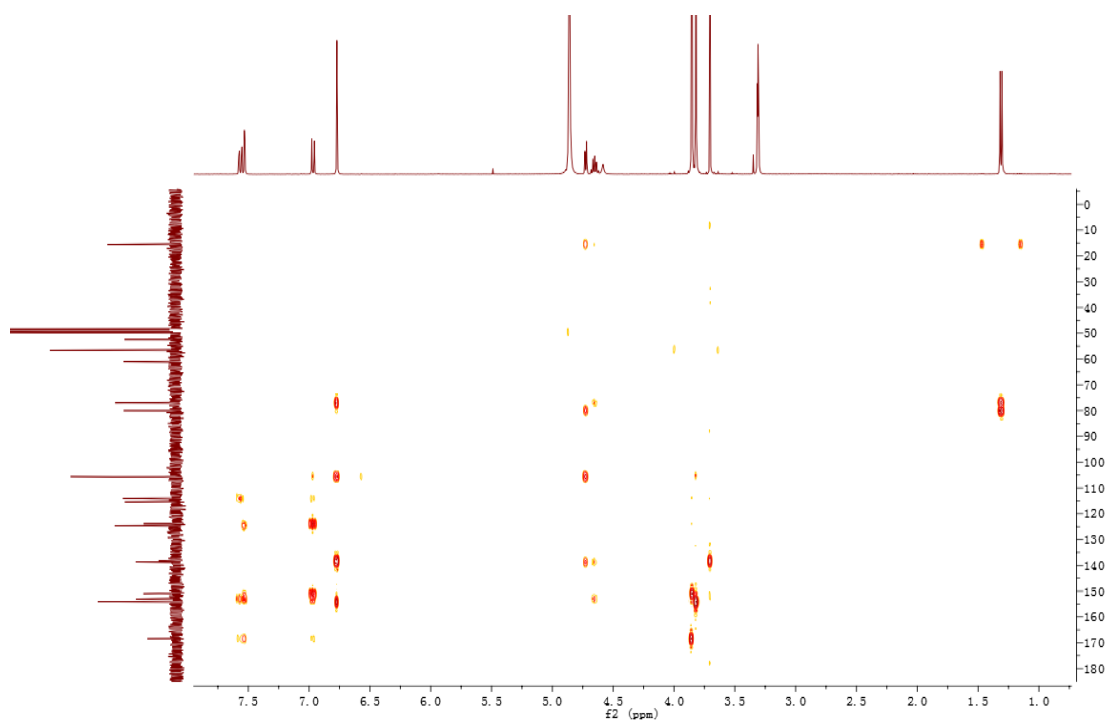

**Figure S75.**  $^1\text{H}$ - $^1\text{H}$  COSY spectrum of **8** in  $\text{CD}_3\text{OD}$

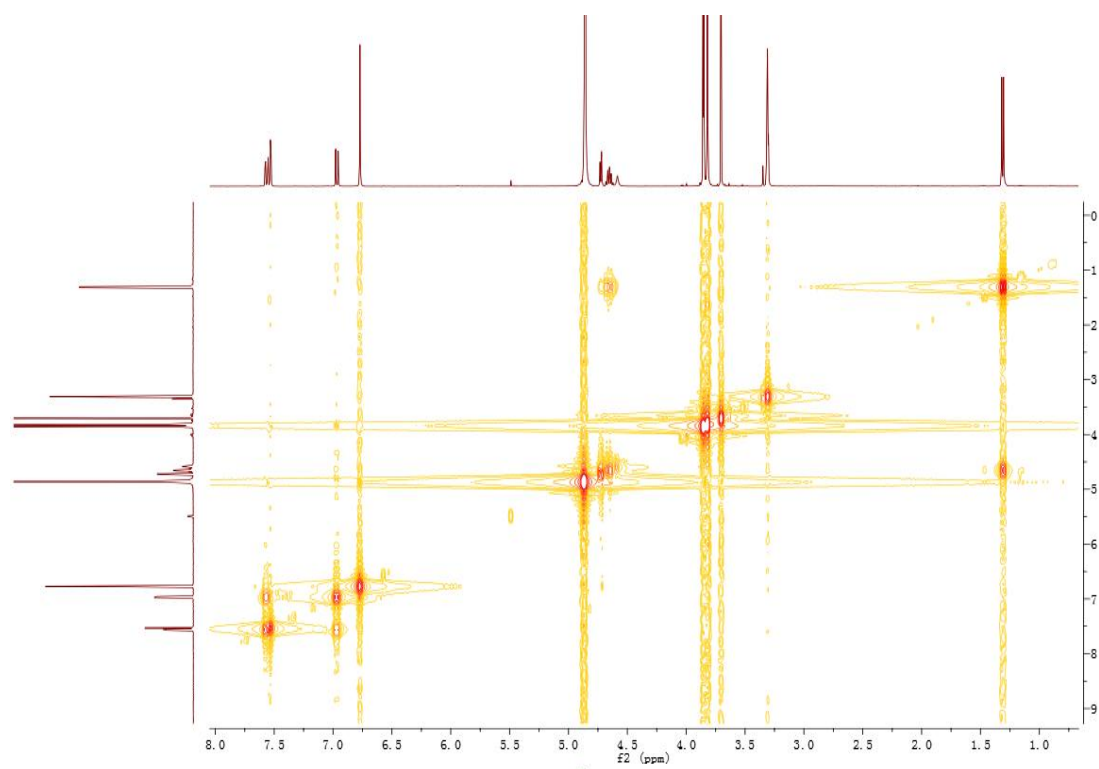

**Figure S76.** NOESY spectrum of **8** in  $\text{CD}_3\text{OD}$

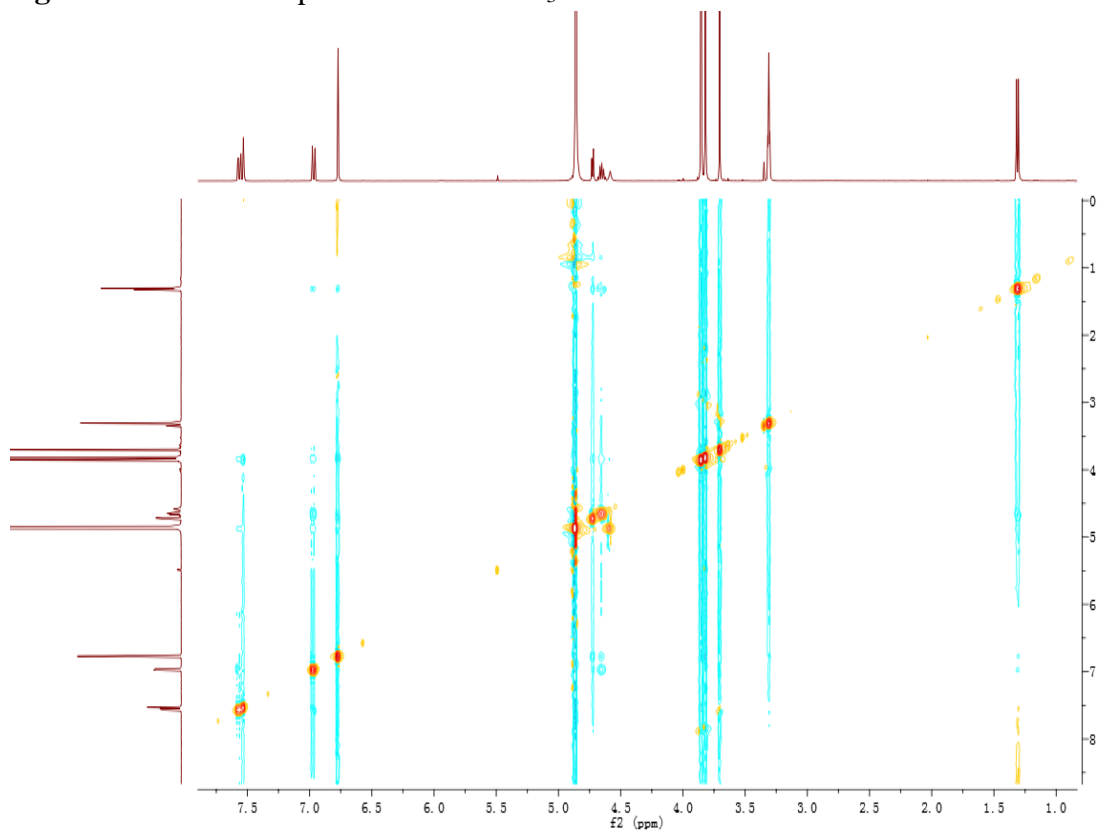

Figure S77. ECD spectrum of **8** in MeOH

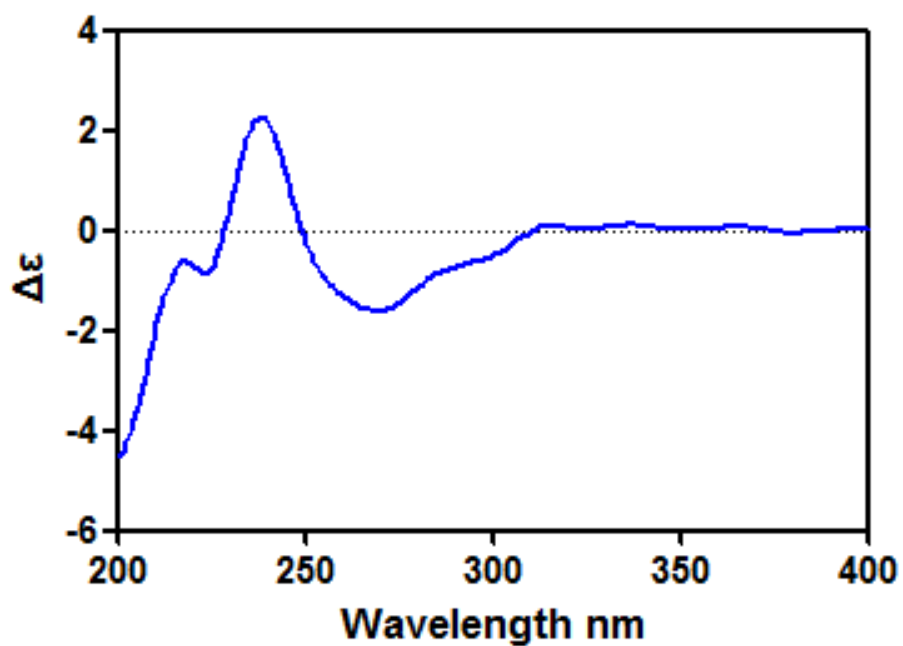

Figure S78. (+)-HR-ESI-MS spectrum of *S*-MTPA-**7** ester

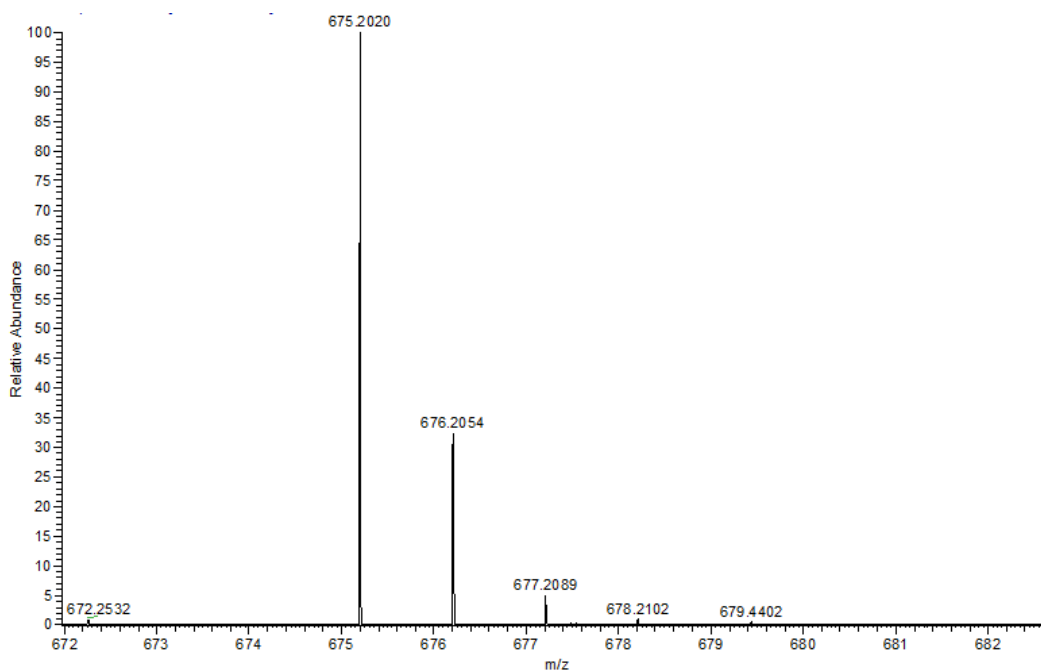

**Figure S79.** (+)-HR-ESI-MS spectrum of *R*-MTPA-7 ester

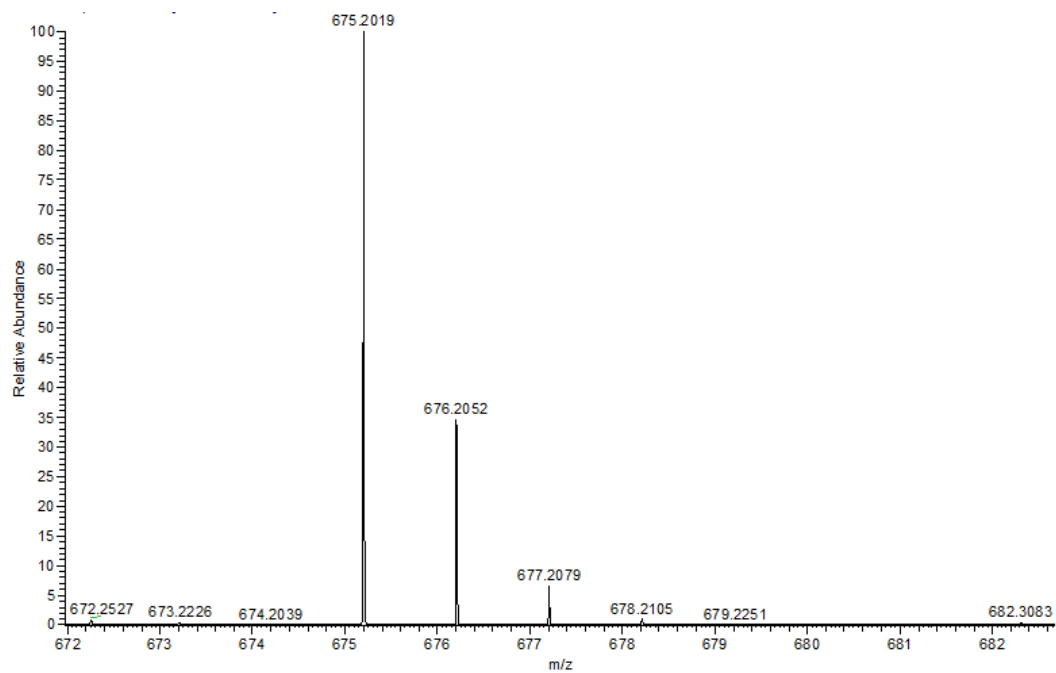

**Figure S80.**  $^1\text{H}$  NMR spectrum of *R/S*-MTPA-7 ester in  $\text{CD}_3\text{OD}$

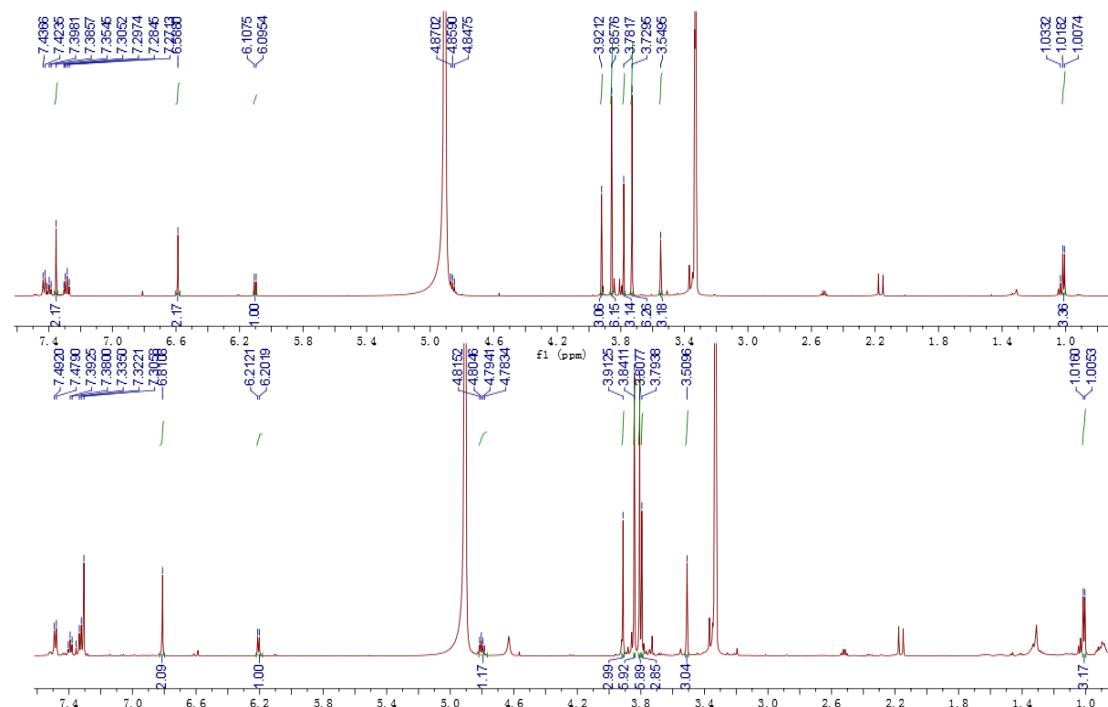

**Figure S81.** ECD spectra calculation

The conformational analyses were carried out for compounds **1a/1b** using BALLOON11 and confab12 programs. The theoretical calculation of ECD was performed using time-dependent density functional theory (TDDFT) at the B3LYP/6-31G (d, p) level in methanol with a PCM model. The calculated ECD curve was generated using SpecDis 1.51.

**Figure S82.** Five lowest energy conformers of the isomer *7S,7'R,8S,8'S* and five lowest energy conformers of the *7R,7'S,8R,8'R* isomer of compound **1**.

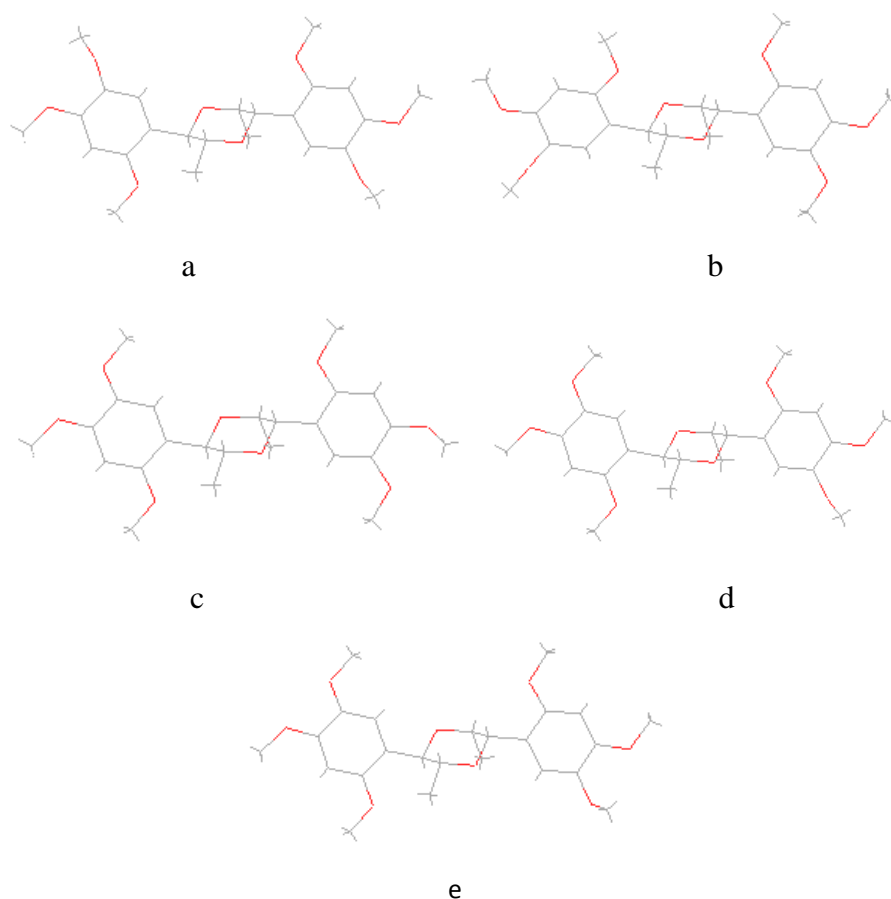

a-e: Five lowest energy conformers of the *7S, 7'R, 8S, 8'S* isomer.
